# Supplementary material for: The Correlation Between Novel Survival-related Alternative Splicing Signature and Prognostic Prediction and Immune Microenvironment in Clear Cell Renal Cell Carcinoma
Source: Research Square preprint supplement (doi:10.21203/rs.3.rs-1209772/v1), 2021-12-30
Supplement: Supplementary file 1 [file afcb1cde98a946a9ce8d2f1c.xlsx]

## Sheet: risk
	Supplementary Excel 2: The riskScore of each KIRC patients in different 8 types of prognostic risk models.
	Clinical Types			ALL								AA								AD									AP								AT									ES
	ID	futime	fustat	C4orf19|69001|AT	UACA|31438|AP	FAM120C|89237|AT	TRIM16L|39629|AP	SEC31A|100881|ES	riskScore	risk		GIT2|24375|AA	RPS24|12297|AA	TAF1D|18320|AA	MEIS3|50645|AA	WDR6|64803|AA	riskScore	risk		STRA13|44264|AD	NT5C|43362|AD	PIGG|68359|AD	GLUL|9148|AD	EIF3K|49686|AD	TIGD6|74053|AD	riskScore	risk		UACA|31438|AP	LIMA1|21691|AP	ARHGAP24|69814|AP	TAOK3|24697|AP	TRIM16|39362|AP	riskScore	risk		C4orf19|69001|AT	EPC2|55538|AT	INADL|3237|AT	FAM120C|89237|AT	BCCIP|13432|AT	ZNF814|52355|AT	riskScore	risk		SIPA1L1|28199|ES	GK|88735|ES	CLEC1A|20304|ES	SEC31A|100881|ES
	TCGA-3Z-A93Z	1.05479	0	0.8124	0.7456	0.5123	0.9646	0.7724	0.599657	low		0.7615	0.4938	0.1165	0.3362	0.0913	0.735432	low		0.0941	0.2624	0.8527	0.127	0.9546	0.7023	0.778088	low		0.7456	0.5873	0.0235	0.7665	0.8656	0.393145	low		0.8124	0.9055	0.0513	0.5123	0.2216	0.1492	0.878508	high		0.0503	0.1849	0.3557	0.7724
	TCGA-6D-AA2E	0.991781	0	0.82	0.5016	0.4433	0.5683	0.7195	1.66351	high		0.3798	0.4046	0.3789	0.2404	0.0772	0.997249	high		0.0796	0.215	0.9022	0.6393	0.9547	0.8208	1.04852	high		0.5016	0.5783	0.0239	0.5027	0.3452	1.5487	high		0.82	0.9414	0.0894	0.4433	0.2048	0.1531	0.860951	high		0.0721	0.0211	0.5578	0.7195
	TCGA-A3-3306	3.06849	0	0.9382	0.9372	0.4232	0.9488	0.7283	0.345102	low		0.404	0.6983	0.1852	0.5174	0.2248	0.752092	low		0.0407	0.2775	0.9816	0.2769	0.9495	0.5408	0.466412	low		0.9372	0.5433	0.0699	0.5412	0.9616	0.339657	low		0.9382	0.926	0.0644	0.4232	0.2487	0.3714	1.29851	high		0.0711	0.4353	0.3837	0.7283
	TCGA-A3-3307	3.93425	0	0.8348	0.83	0.4228	0.9335	0.7792	0.455241	low		0.1253	0.5215	0.2363	0.4107	0.2312	0.785303	low		0.1347	0.3395	0.9257	0.4946	0.9731	0.6238	0.835133	low		0.83	0.5584	0.0269	0.7273	0.794	0.386856	low		0.8348	0.9432	0.0487	0.4228	0.268	0.2527	0.865385	high		0.0246	0.1634	0.252	0.7792
	TCGA-A3-3308	0.0438356	0	0.7695	0.5009	0.3921	0.6918	0.6045	1.62468	high		0.2984	0.3754	0.3903	0.4776	0.2732	2.06225	high		0.178	0.2909	0.9334	0.7794	0.92	0.6455	1.32109	high		0.5009	0.251	0.0253	0.7029	0.3332	1.94374	high		0.7695	0.8665	0.0892	0.3921	0.2277	0.2787	1.50437	high		0.2626	0.1389	0.1441	0.6045
	TCGA-A3-3311	3.26301	1	0.8417	0.6691	0.3526	0.8561	0.8067	0.588988	low		0.1688	0.4779	0.3343	0.3335	0.2603	1.06791	high		0.1098	0.3614	0.9779	0.4975	0.8443	0.6943	1.44758	high		0.6691	0.6428	0.0739	0.7392	0.778	0.540039	low		0.8417	0.905	0.101	0.3526	0.281	0.2454	0.903775	high		0.0177	0.2044	0.3526	0.8067
	TCGA-A3-3313	2.0137	1	0.8928	0.7547	0.5176	0.6802	0.8368	0.75135	low		0.1979	0.7359	0.4681	0.1104	0.391	0.934344	high		0.139	0.2713	0.8623	0.8187	0.9615	0.7644	1.46835	high		0.7547	0.3586	0.0301	0.3649	0.7907	0.834733	high		0.8928	0.9736	0.0893	0.5176	0.3381	0.2789	0.789819	low		0.1351	0.0564	0.9142	0.8368
	TCGA-A3-3316	4.09041	0	0.5876	0.7282	0.1379	0.7379	0.4718	1.07391	high		0.2651	0.2415	0.2273	0.5296	0.337	2.04291	high		0.171	0.3697	1	0.8525	0.8973	0.7683	1.70519	high		0.7282	0.242	0.0847	0.5886	0.685	1.02866	high		0.5876	0.9307	0.0769	0.1379	0.2117	0.2562	1.19752	high		0.0857	0.4926	0.2906	0.4718
	TCGA-A3-3317	4.08493	0	0.7685	0.6617	0.1376	0.766	0.7804	0.574044	low		0.2858	0.6646	0.4041	0.2617	0.4149	1.26088	high		0.2548	0.3915	0.9743	0.5151	0.86	0.7233	1.89027	high		0.6617	0.1737	0.0478	0.6575	0.7104	1.08767	high		0.7685	0.9281	0.1033	0.1376	0.1657	0.2393	1.06753	high		0.1061	0.3231	0.5476	0.7804
	TCGA-A3-3319	3.09589	0	0.8179	0.3934	0.3704	0.8454	0.7561	1.12771	high		0.4382	0.545	0.4348	0.2785	0.4742	2.20237	high		0.1429	0.3136	0.7825	0.8833	0.816	0.7572	4.15636	high		0.3934	0.7723	0.1506	0.5107	0.7199	1.27639	high		0.8179	0.8727	0.1586	0.3704	0.2646	0.2783	1.38981	high		0.0578	0.2139	0.7329	0.7561
	TCGA-A3-3320	4.13151	0	0.7248	0.6509	0.4136	0.9071	0.8771	0.645662	low		0.2245	0.761	0.3274	0.2633	0.2901	0.654503	low		0.0791	0.2841	0.8777	0.4859	0.9661	0.7024	0.913252	low		0.6509	0.4737	0.0078	0.7737	0.878	0.524277	low		0.7248	0.8955	0.0852	0.4136	0.3012	0.2076	0.933211	high		0.1867	0.2461	0.2823	0.8771
	TCGA-A3-3322	4.04932	0	0.6315	0.6784	0.279	0.8983	0.8449	0.60734	low		0.2218	0.6174	0.1387	0.586	0.2	0.68471	low		0.088	0.335	0.8407	0.559	0.9486	0.7582	1.39363	high		0.6784	0.3313	0.0291	0.6742	0.8999	0.661481	low		0.6315	0.945	0.0759	0.279	0.2164	0.2169	1.09402	high		0.1189	0.1043	0.3262	0.8449
	TCGA-A3-3323	3.03014	0	0.6445	0.539	0.2162	0.9192	0.707	0.835715	low		0.2671	0.521	0.1549	0.7379	0.3047	1.33241	high		0.2034	0.3552	0.8911	0.7192	0.977	0.7162	1.39302	high		0.539	0.3492	0.1831	0.6399	0.9304	1.17445	high		0.6445	0.9164	0.0847	0.2162	0.3423	0.2293	0.750284	low		0.1121	0.2044	0.3397	0.707
	TCGA-A3-3324	3.24932	0	0.7926	0.6174	0.2003	0.8688	0.8211	0.530259	low		0.2531	0.4889	0.2467	0.5138	0.2609	1.17053	high		0.1288	0.2192	0.8884	0.5896	0.9633	0.9022	1.22327	high		0.6174	0.5326	0.0462	0.6696	0.8068	0.67685	low		0.7926	0.919	0.1098	0.2003	0.2452	0.2711	0.990291	high		0.0986	0.1562	0.2202	0.8211
	TCGA-A3-3325	3.20548	1	0.7511	0.7692	0.2601	0.92	0.6676	0.540606	low		0.2514	0.596	0.2037	0.3915	0.3374	0.857171	low		0.1566	0.2634	0.959	0.5063	0.9371	0.657	0.859478	low		0.7692	0.3859	0.0561	0.5671	0.897	0.59991	low		0.7511	0.8813	0.0608	0.2601	0.305	0.2602	0.872822	high		0.0462	0.2357	0.3718	0.6676
	TCGA-A3-3326	3.11507	0	0.7516	0.9824	0.3352	0.78	0.9129	0.351208	low		0.2627	0.5055	0.0899	0.6318	0.2475	0.891306	high		0.0691	0.278	0.93	0.5738	0.918433	0.6238	0.920937	low		0.9824	0.3996	0.0385	0.7014	0.8906	0.321337	low		0.7516	0.9358	0.0561	0.3352	0.2718	0.1996	0.747825	low		0.0543	0.227	0.5923	0.9129
	TCGA-A3-3328	3.79452	0	0.8967	0.6468	0.0838	0.8271	0.9007	0.349673	low		0.3859	0.9536	0.5486	0.0499	0.1621	0.54428	low		0.0696	0.2338	0.9656	0.7244	0.9691	0.8381	0.902885	low		0.6468	0.8789	0.0045	0.6811	0.5482	0.505811	low		0.8967	0.9084	0.0556	0.0838	0.3402	0.1771	0.351564	low		0.1652	0.0377	0.6397	0.9007
	TCGA-A3-3329	4.44932	0	0.844	0.6846	0.3966	0.9461	0.9313	0.439473	low		0.251	0.5737	0.2236	0.3915	0.197	0.708336	low		0.0486	0.1535	0.921	0.4506	0.93906	0.6492	0.6313	low		0.6846	0.5762	0.0851	0.7114	0.9562	0.487448	low		0.844	0.926	0.0725	0.3966	0.2287	0.2108	0.89024	high		0.1044	0.0848	0.244	0.9313
	TCGA-A3-3331	3.44384	0	0.7417	0.6638	0.2538	0.8163	0.8514	0.583857	low		0.1924	0.4146	0.2436	0.1682	0.3999	1.01278	high		0.0911	0.235	0.8552	0.6249	0.9597	0.6652	0.996546	high		0.6638	0.5293	0.0654	0.7162	0.6277	0.748922	low		0.7417	0.8742	0.08	0.2538	0.2688	0.2031	0.85708	high		0.0566	0.0808	0.3361	0.8514
	TCGA-A3-3335	5.16712	0	0.7088	0.5022	0.5721	0.9039	0.5806	1.70852	high		0.6008	0.6771	0.1399	0.5914	0.4154	1.34332	high		0.0762	0.3049	0.9082	0.7584	0.9431	0.9262	1.5916	high		0.5022	0.6253	0.0681	0.5373	0.8371	0.883045	high		0.7088	0.8379	0.1269	0.5721	0.1402	0.145	1.95851	high		0.0543	0.2368	0.3262	0.5806
	TCGA-A3-3343	2.58904	0	0.7927	0.5339	0.2345	0.8886	0.8879	0.568755	low		0.343	0.6352	0.1245	0.6457	0.1999	0.776619	low		0.081	0.2875	0.9405	0.6232	0.9186	0.8043	1.21932	high		0.5339	0.4299	0.052	0.7085	0.8945	0.808054	low		0.7927	0.9186	0.0283	0.2345	0.3033	0.1825	0.518284	low		0.1199	0.0835	0.1804	0.8879
	TCGA-A3-3346	0.375342	1	0.8027	0.1859	0.7123	0.4608	0.5889	6.41267	high		0.6679	0.1409	0.2087	0.5587	0.1982	2.62476	high		0.0913	0.2391	0.9728	0.7261	0.882	0.6948	1.15313	high		0.1859	0.3031	0.4952	0.5472	0.2437	11.509	high		0.8027	0.7226	0.1337	0.7123	0.1787	0.3535	4.90622	high		0.0843	0.241	0.6679	0.5889
	TCGA-A3-3347	4.41096	1	0.4432	0.4482	0.3744	0.8607	0.5701	2.17619	high		0.4233	0.3111	0.3209	0.5224	0.4432	3.22562	high		0.2217	0.3232	0.9181	0.7403	0.9107	0.762	1.85158	high		0.4482	0.2504	0.3061	0.6913	0.702	2.52102	high		0.4432	0.8649	0.2412	0.3744	0.1917	0.2418	3.34294	high		0.0719	0.3502	0.7948	0.5701
	TCGA-A3-3349	3.79452	0	0.6556	0.5153	0.4551	0.9349	0.7694	1.0827	high		0.3708	0.4227	0.2042	0.4002	0.167	0.926703	high		0.0789	0.2886	0.9164	0.2044	0.9736	0.6413	0.589611	low		0.5153	0.295	0.0203	0.5268	0.878	1.13447	high		0.6556	0.8666	0.0545	0.4551	0.2765	0.2099	1.18508	high		0.0808	0.1205	0.1996	0.7694
	TCGA-A3-3351	2.49315	0	0.6639	0.4569	0.4279	0.8469	0.6817	1.49472	high		0.3226	0.4251	0.1965	0.3587	0.1419	0.778466	low		0.1142	0.4026	0.9014	0.5178	0.945	0.6502	1.16557	high		0.4569	0.395	0.1299	0.6762	0.849	1.25696	high		0.6639	0.9311	0.0376	0.4279	0.2628	0.2351	1.07725	high		0.0782	0.4037	0.2591	0.6817
	TCGA-A3-3352	1.53699	1	0.7615	0.6866	0.3634	0.8622	0.8839	0.568327	low		0.2104	0.6594	0.1403	0.3035	0.1792	0.409001	low		0.0743	0.2271	0.9611	0.4902	0.9702	0.6294	0.574585	low		0.6866	0.5372	0.0116	0.8204	0.831	0.456416	low		0.7615	0.8958	0.091	0.3634	0.2777	0.2383	1.01586	high		0.0747	0.2475	0.2604	0.8839
	TCGA-A3-3357	7.36438	0	0.8285	0.7821	0.3404	0.7864	0.9036	0.461547	low		0.2611	0.6643	0.2095	0.1707	0.2634	0.494742	low		0.1252	0.2128	0.962	0.8306	0.9628	0.7876	1.00302	high		0.7821	0.7025	0.0632	0.7181	0.7598	0.403411	low		0.8285	0.9442	0.048	0.3404	0.2983	0.2694	0.758996	low		0.0772	0.1247	0.3863	0.9036
	TCGA-A3-3358	3.58082	0	0.826	0.7988	0.3416	0.936	0.8182	0.406629	low		0.2498	0.4373	0.187	0.2324	0.1561	0.601082	low		0.0957	0.2621	0.9841	0.5476	0.954	0.8097	0.845166	low		0.7988	0.6064	0.083	0.8276	0.8885	0.354401	low		0.826	0.847	0.1039	0.3416	0.1921	0.2018	1.20411	high		0.1292	0.1651	0.2103	0.8182
	TCGA-A3-3359	6.86027	0	0.7652	0.5625	0.1583	0.9004	0.8643	0.509828	low		0.3195	0.5568	0.2491	0.3398	0.1987	0.770823	low		0.1684	0.2952	0.9063	0.5679	0.93523	0.6687	1.15927	high		0.5625	0.3809	0.0174	0.634	0.8613	0.842972	high		0.7652	0.9137	0.0588	0.1583	0.3248	0.1913	0.514162	low		0.1091	0.1876	0.263	0.8643
	TCGA-A3-3362	4.27123	0	0.8202	0.5785	0.4089	0.8144	0.8568	0.766482	low		0.3484	0.5181	0.1599	0.2814	0.2724	0.720843	low		0.0892	0.3203	0.9055	0.3821	0.9558	0.7078	0.889017	low		0.5785	0.4602	0.0054	0.6914	0.6163	0.900009	high		0.8202	0.9012	0.0466	0.4089	0.275	0.186	0.73519	low		0.1393	0.0354	0.2498	0.8568
	TCGA-A3-3363	0.873973	0	0.8854	0.5842	0.3337	0.7613	0.5813	1.02457	high		0.425	0.7712	0.4721	0.114	0.1753	0.713553	low		0.055	0.285	0.8853	0.4063	0.9547	0.6292	0.776287	low		0.5842	0.7165	0.0825	0.5279	0.726	0.781396	low		0.8854	0.9281	0.0329	0.3337	0.2742	0.2161	0.621248	low		0.1253	0.0774	0.3262	0.5813
	TCGA-A3-3365	2.39178	0	0.7233	0.8637	0.3453	0.8144	0.7795	0.531891	low		0.5293	0.4655	0.198	0.4237	0.1635	1.003	high		0.1126	0.3651	0.8879	0.1805	0.9149	0.8843	1.37911	high		0.8637	0.2771	0.0204	0.629	0.7199	0.602853	low		0.7233	0.886	0.0596	0.3453	0.262	0.1878	0.883193	high		0.1182	0.1139	0.1284	0.7795
	TCGA-A3-3367	6.21918	0	0.731	0.8502	0.4208	0.874	0.8612	0.486055	low		0.2234	0.6539	0.1671	0.1618	0.2801	0.447086	low		0.1275	0.2674	0.9332	0.6648	0.9789	0.6783	0.849891	low		0.8502	0.4691	0.0533	0.6698	0.8396	0.438144	low		0.731	0.8896	0.0778	0.4208	0.3588	0.2282	0.827863	low		0.0191	0.1412	0.1326	0.8612
	TCGA-A3-3370	6.23014	0	0.759	0.7488	0.2783	0.9054	0.9058	0.40736	low		0.2799	0.5166	0.1854	0.3206	0.3169	0.836025	low		0.1197	0.2727	0.8994	0.6431	0.9711	0.631	0.896726	low		0.7488	0.4391	0.081	0.7551	0.8525	0.539148	low		0.759	0.9041	0.0526	0.2783	0.3042	0.2443	0.778002	low		0.0849	0.1025	0.2745	0.9058
	TCGA-A3-3372	2.0137	0	0.7399	0.6048	0.1989	0.7912	0.7448	0.733517	low		0.318	0.431	0.2729	0.2434	0.2655	1.00943	high		0.1404	0.3842	0.9037	0.674	0.9611	0.8346	1.55844	high		0.6048	0.374	0.0624	0.7103	0.7319	0.913201	high		0.7399	0.9195	0.1446	0.1989	0.2839	0.2324	0.886524	high		0.0612	0.1948	0.3262	0.7448
	TCGA-A3-3373	4.4411	0	0.9299	0.6944	0.1279	0.9234	0.8109	0.323247	low		0.1132	0.4975	0.2731	0.4516	0.1405	0.78513	low		0.1139	0.126	0.9795	0.3403	0.9767	0.5905	0.399768	low		0.6944	0.5492	0.0199	0.9217	0.8559	0.396065	low		0.9299	0.95	0.0376	0.1279	0.295	0.1631	0.339486	low		0.0401	0.0345	0.1306	0.8109
	TCGA-A3-3374	3.6	0	0.909	0.57152	0.1704	0.3993	0.7157	1.14117	high		0.3006	0.8174	0.5945	0.4144	0.3182	1.62084	high		0.1184	0.2185	0.9798	0.7746	0.8947	0.8973	1.45453	high		0.57152	0.7988	0.4161	0.8385	0.2044	1.86388	high		0.909	0.857	0.0711	0.1704	0.3035	0.0724	0.345954	low		0	0.0982	0.244	0.7157
	TCGA-A3-3376	4.64658	1	0.7253	0.5845	0.2756	0.9136	0.5431	0.973847	high		0.2522	0.2624	0.2119	0.4505	0.3124	1.59848	high		0.0815	0.2895	0.9188	0.1564	0.94553	0.5561	0.578803	low		0.5845	0.3735	0.0683	0.7378	0.7413	0.929371	high		0.7253	0.9128	0.0849	0.2756	0.2639	0.2175	0.891964	high		0.0641	0.296	0.2709	0.5431
	TCGA-A3-3378	1.72603	0	0.7037	0.3831	0.3724	0.9011	0.4923	1.82922	high		0.3291	0.2789	0.4998	0.3621	0.2271	2.54974	high		0.1803	0.3035	0.9422	0.8998	0.933033	0.7133	1.48913	high		0.3831	0.5535	0.1351	0.5444	0.7771	1.50405	high		0.7037	0.878	0.087	0.3724	0.2058	0.2751	1.66785	high		0.1972	0.2398	0.5923	0.4923
	TCGA-A3-3380	1.55342	0	0.7071	0.5316	0.4033	0.8913	0.934	0.760062	low		0.4215	0.5809	0.1382	0.5145	0.3483	1.05548	high		0.0802	0.2586	0.9824	0.3607	0.9526	0.7127	0.632372	low		0.5316	0.2469	0.0546	0.673	0.8808	1.07595	high		0.7071	0.9247	0.054	0.4033	0.2428	0.1465	0.80493	low		0.0916	0.1291	0.4413	0.934
	TCGA-A3-3382	1.5726	0	0.2667	0.5609	0.1967	0.8551	0.4996	1.93792	high		0.3334	0.421	0.1651	0.3602	0.1963	0.816772	low		0.0729	0.3566	0.9051	0.8115	0.9319	0.8001	1.62203	high		0.5609	0.4129	0.0692	0.7929	0.6066	1.02837	high		0.2667	0.9197	0.0587	0.1967	0.248	0.2815	1.98265	high		0.0412	0.4614	0.1314	0.4996
	TCGA-A3-3383	2.3589	0	0.791	0.5633	0.6188	0.8758	0.9174	0.923921	high		0.7821	0.5469	0.1865	0.4418	0.1272	1.01483	high		0.1068	0.2298	0.9221	0.2563	0.9502	0.5262	0.545996	low		0.5633	0.191	0	0.4915	0.563	1.65537	high		0.791	0.9063	0.1332	0.6188	0.2746	0.1656	1.09772	high		0	0.1436	0.3212	0.9174
	TCGA-A3-3385	5.46027	0	0.7526	0.5352	0.2945	0.9161	0.9143	0.60158	low		0.2614	0.5927	0.1623	0.40156	0.2123	0.620835	low		0.1123	0.2895	0.9062	0.374	0.936711	0.799	1.07095	high		0.5352	0.5744	0.0083	0.822	0.9243	0.535223	low		0.7526	0.9388	0.0597	0.2945	0.3119	0.1652	0.552883	low		0.1494	0.0928	0.5305	0.9143
	TCGA-A3-3387	1.69041	0	0.7512	0.6548	0.3137	0.9298	0.4951	0.918424	high		0.27	0.4095	0.1427	0.4049	0.2507	0.882571	high		0.0969	0.2228	0.8921	0.4517	0.913	0.5856	0.868645	low		0.6548	0.3261	0.1239	0.7527	0.7853	0.889354	high		0.7512	0.9125	0.0918	0.3137	0.2031	0.2139	1.09922	high		0.0588	0.1847	0.2266	0.4951
	TCGA-A3-A6NI	2.78904	0	0.7301	0.4454	0.4706	0.8573	0.8318	1.16862	high		0.4104	0.5803	0.1499	0.2158	0.1445	0.473142	low		0.0712	0.2454	0.8991	0.4438	0.9675	0.7906	0.857146	low		0.4454	0.6319	0.0254	0.7756	0.8529	0.706502	low		0.7301	0.9359	0.0268	0.4706	0.2349	0.2153	1.01155	high		0.0744	0.3233	0.3798	0.8318
	TCGA-A3-A6NJ	1.28219	0	0.8122	0.8091	0.2886	0.9222	0.9122	0.333557	low		0.3129	0.4385	0.1566	0.3565	0.1244	0.657453	low		0.103	0.2112	0.9023	0.3148	0.941283	0.4856	0.575753	low		0.8091	0.5165	0.0813	0.8857	0.7073	0.447926	low		0.8122	0.9198	0.0247	0.2886	0.2241	0.1726	0.664378	low		0.0593	0.0937	0.132	0.9122
	TCGA-A3-A6NL	1.88767	0	0.7602	0.6036	0.4302	0.9078	0.6891	0.911788	high		0.3613	0.4606	0.1634	0.3804	0.1627	0.75017	low		0.1239	0.2754	0.8599	0.4482	0.943237	0.4928	0.833295	low		0.6036	0.3166	0.0048	0.8185	0.9322	0.629537	low		0.7602	0.8828	0.0391	0.4302	0.2851	0.1422	0.700177	low		0.2343	0.1715	0.1913	0.6891
	TCGA-A3-A6NN	0.00821918	0	0.8243	0.4364	0.4308	0.9394	0.7107	1.04686	high		0.2792	0.3715	0.164	0.3742	0.0528	0.648069	low		0.075	0.2222	0.9405	0.4449	0.9628	0.5191	0.523615	low		0.4364	0.5946	0.0812	0.8882	0.8656	0.743424	low		0.8243	0.939	0.0581	0.4308	0.3029	0.2055	0.689881	low		0.0536	0.22	0.2128	0.7107
	TCGA-A3-A8CQ	0.00821918	0	0.7868	0.5863	0.5064	0.872	0.8816	0.802848	low		0.3061	0.5712	0.2208	0.3518	0.0934	0.571628	low		0.1106	0.2322	0.9049	0.1128	0.9657	0.3983	0.407733	low		0.5863	0.493	0.0392	0.8294	0.8783	0.590775	low		0.7868	0.8681	0.0627	0.5064	0.3415	0.1353	0.650478	low		0.1227	0.1509	0.3822	0.8816
	TCGA-A3-A8OU	0.00273973	0	0.7517	0.6998	0.4444	0.69	0.8328	0.890361	high		0.3111	0.4157	0.2892	0.2657	0.2333	1.03825	high		0.0966	0.2973	0.9449	0.6511	0.9521	0.6006	0.834591	low		0.6998	0.5123	0.089	0.6605	0.7204	0.706252	low		0.7517	0.9123	0.0638	0.4444	0.2598	0.1648	0.838693	low		0.1393	0.237	0.2677	0.8328
	TCGA-A3-A8OV	0.931507	0	0.8283	0.7268	0.3859	0.8278	0.9013	0.513507	low		0.4676	0.6117	0.126	0.5134	0.1103	0.630781	low		0.0803	0.2174	0.9013	0.1202	0.9436	0.5082	0.494884	low		0.7268	0.5856	0.0504	0.8097	0.8272	0.432756	low		0.8283	0.9408	0.0449	0.3859	0.3868	0.1516	0.394274	low		0.1018	0.0705	0.5867	0.9013
	TCGA-A3-A8OW	0.884932	0	0.8416	0.6002	0.3672	0.8839	0.8816	0.583591	low		0.2564	0.5422	0.1691	0.2968	0.109	0.482081	low		0.0785	0.264	0.9098	0.5641	0.9625	0.4581	0.626193	low		0.6002	0.4804	0	0.8226	0.7746	0.610484	low		0.8416	0.9455	0.0692	0.3672	0.2844	0.1501	0.549934	low		0.0692	0.1773	0.1813	0.8816
	TCGA-A3-A8OX	0.00273973	0	0.8694	0.636	0.3149	0.9276	0.7236	0.579377	low		0.2762	0.3903	0.3442	0.4221	0.0536	1.05185	high		0.0662	0.2971	0.9513	0.6614	0.9563	0.5982	0.769005	low		0.636	0.5119	0.0793	0.6706	0.8112	0.708544	low		0.8694	0.8802	0.0849	0.3149	0.1701	0.1476	0.861048	high		0.1393	0.1879	0.2065	0.7236
	TCGA-AK-3425	9.1589	0	0.699	0.8144	0.3802	0.9745	0.6272	0.621322	low		0.4299	0.6363	0.1186	0.3056	0.11	0.428704	low		0.0875	0.2214	0.9144	0.3885	0.8457	0.7472	1.29821	high		0.8144	0.5017	0.0499	0.8629	0.7696	0.404107	low		0.699	0.8286	0.0819	0.3802	0.2122	0.1849	1.33346	high		0.0182	0.2044	0.1335	0.6272
	TCGA-AK-3426	2.42466	1	0.5773	0.3367	0.7533	0.5037	0.57599	6.6576	high		0.897	0.2596	0.4073	0.8428	0.2527	7.17024	high		0.3661	0.309	0.625	0.9385	0.951	0.8994	6.17756	high		0.3367	0.1861	0.4303	0.094	0.3635	11.5759	high		0.5773	0.7656	0.14	0.7533	0.1438	0.266	5.44559	high		0.4259	0.2489	0.8878	0.57599
	TCGA-AK-3427	9.81644	0	0.9245	0.7218	0.0928	0.8043	0.8698	0.323478	low		0.5218	0.8504	0.2914	0.0604	0.2312	0.448408	low		0.0454	0.1835	0.955	0.20001	0.9351	0.7878	0.605502	low		0.7218	0.5871	0.0598	0.758	0.5024	0.675082	low		0.9245	0.8395	0.0371	0.0928	0.1733	0.0721	0.45603	low		0.03912	0.0618	0.1771	0.8698
	TCGA-AK-3428	10.2137	0	0.8969	0.7822	0.0808	0.9855	0.8372	0.234876	low		0.3099	0.644	0.0453	0.2949	0.05	0.276849	low		0.1111	0.2698	1	0.2784	0.8955	0.2238	0.413001	low		0.7822	0.7342	0	1	0.9747	0.204003	low		0.8969	0.8092	0.0572	0.0808	0.3494	0.0801	0.303206	low		0.0619	0.186	0.0883	0.8372
	TCGA-AK-3429	9.11781	0	0.8845	0.5593	0.3462	0.9735	0.9006	0.487693	low		0.4739	0.5094	0.1669	0.586	0.0266	0.784648	low		0.0445	0.1058	0.9194	0.1135	0.8654	0.3229	0.412284	low		0.5593	0.4801	0.047	0.8813	0.9391	0.57266	low		0.8845	0.8943	0.0664	0.3462	0.3226	0.1094	0.4292	low		0	0.1805	0.0571	0.9006
	TCGA-AK-3431	6.13973	1	0.8777	0.4681	0.1559	0.9325	0.5159	0.835678	low		0.3821	0.4365	0.1777	0.4144	0.0943	0.755894	low		0.1347	0.3222	1	0.4497	0.93474	0.514	0.652633	low		0.4681	0.2407	0.0368	0.6002	0.9078	1.24602	high		0.8777	0.8642	0.0545	0.1559	0.2313	0.1329	0.530935	low		0.0501	0.4926	0.1449	0.5159
	TCGA-AK-3433	9.33973	0	0.8456	0.6495	0.1703	0.9178	0.9584	0.336795	low		0.3081	0.9197	0.3071	0.24957	0.176	0.400209	low		0.1209	0.2965	0.9442	0.5119	0.9247	0.7326	1.05798	high		0.6495	0.9325	0.0302	0.6797	0.9204	0.325601	low		0.8456	0.9073	0.0276	0.1703	0.2863	0.2668	0.649365	low		0	0.19	0.4365	0.9584
	TCGA-AK-3434	5.71781	0	0.6774	0.6942	0.4783	0.8159	0.8013	0.900655	high		0.8387	0.6166	0.2251	0.4911	0.1037	1.0677	high		0.135	0.1869	0.8094	0.605	0.8695	0.8172	2.07461	high		0.6942	0.1666	0.0796	0.5469	0.721811	1.19971	high		0.6774	0.8121	0.0281	0.4783	0.2696	0.1495	1.03882	high		0.0803	0.2602	0.1835	0.8013
	TCGA-AK-3436	9.12603	0	0.8016	0.4748	0.6434	0.854	0.7274	1.52601	high		0.5952	0.4292	0.1067	0.6218	0.2788	1.49463	high		0.0297	0.2124	1	0.7915	0.8818	0.5023	0.752532	low		0.4748	0.4868	0.0588	0.9754	0.790737	0.749245	low		0.8016	0.9178	0.1533	0.6434	0.1787	0.1214	1.32664	high		0.1367	0.4851	0.0571	0.7274
	TCGA-AK-3440	7.84932	0	0.9018	0.585	0.16	0.9178	0.8578	0.402857	low		0.6178	0.912	0.1751	0.0387	0.2463	0.328748	low		0.1122	0.1671	0.9424	0.4726	0.8725	0.6964	0.994109	high		0.585	0.7245	0.0271	0.7873	0.6473	0.587681	low		0.9018	0.922	0.0805	0.16	0.3047	0.178	0.440755	low		0.0115	0.1146	0.27349	0.8578
	TCGA-AK-3443	3.89863	0	0.883	0.1707	0.2369	0.8481	0.9618	0.931616	high		0.3289	0.9209	0.4035	0.065	0.1273	0.362856	low		0.0994	0.1139	0.9414	0.3242	0.9003	0.6442	0.651519	low		0.1707	0.9373	0.0256	0.7766	0.3395	1.54176	high		0.883	0.8802	0.1125	0.2369	0.2573	0.1035	0.525852	low		0	0.0867	0.5636	0.9618
	TCGA-AK-3444	4.03014	0	0.8592	0.7156	0.1925	0.8724	0.9115	0.348825	low		0.2789	0.5839	0.1834	0.3565	0.0686	0.476548	low		0.105	0.1487	0.9649	0.4062	0.8802	0.8133	0.954331	high		0.7156	0.5187	0.0169	0.661	0.7002	0.601207	low		0.8592	0.8485	0.0549	0.1925	0.2666	0.0864	0.446242	low		0.1285	0.0844	0.1891	0.9115
	TCGA-AK-3445	6.55342	0	0.6792	0.5348	0.2418	0.7417	0.5728	1.34265	high		0.3568	0.1661	0.3046	0.4093	0.3026	2.41344	high		0.1452	0.3847	0.9525	0.8624	0.9302	0.7425	1.61022	high		0.5348	0.2349	0.1631	0.5187	0.6955	1.92545	high		0.6792	0.8752	0.1906	0.2418	0.2445	0.2246	1.38661	high		0.0512	0.2651	0.5305	0.5728
	TCGA-AK-3450	4.13151	0	0.8531	0.6567	0.374	0.9017	0.907	0.490772	low		0.3791	0.4694	0.273	0.2614	0.1149	0.760085	low		0.0791	0.1592	1	0.4952	0.8772	0.7782	0.872227	low		0.6567	0.6202	0.0136	0.5032	0.4907	0.881472	high		0.8531	0.9186	0.0435	0.374	0.1763	0.1284	0.722326	low		0.1652	0.1705	0.1537	0.907
	TCGA-AK-3451	7.85753	0	0.849	0.5386	0.3691	0.803556	0.6691	1.00951	high		0.7933	0.6471	0.2016	0.39712	0.11273	0.818973	low		0.0478	0.1782	1	0.169212	0.9407	0.5875	0.384806	low		0.5386	0.3345	0	0.6386	0.643525	1.15506	high		0.849	0.951	0.0446	0.3691	0.1714	0.1128	0.646579	low		0.04695	0.1309	0	0.6691
	TCGA-AK-3453	6.93425	0	0.883	0.6857	0.3162	0.9493	0.8604	0.410171	low		0.1766	0.8997	0.3203	0.2688	0.1428	0.36608	low		0.071	0.1672	0.9912	0.3125	0.9655	0.7084	0.468044	low		0.6857	0.7998	0.0081	0.7611	0.9325	0.310093	low		0.883	0.9214	0.016	0.3162	0.2558	0.1023	0.42331	low		0.1572	0.0659	0.6289	0.8604
	TCGA-AK-3454	2.39452	0	0.7794	0.687	0.4115	0.9579	0.8519	0.538929	low		0.4918	0.6371	0.1632	0.3088	0.2537	0.675361	low		0.0795	0.1749	0.9514	0.3125	0.9461	0.8055	0.673516	low		0.687	0.5245	0.0115	0.6531	0.6255	0.687768	low		0.7794	0.7694	0.1298	0.4115	0.2349	0.1797	1.42496	high		0.0928	0.2561	0.257	0.8519
	TCGA-AK-3455	1.87123	1	0.8104	0.8229	0.5	0.8171	0.8746	0.552218	low		0.4477	0.5759	0.2197	0.5627	0.1751	1.0142	high		0.081	0.2953	0.9162	0.6452	0.93206	1	1.64215	high		0.8229	0.4645	0.015	0.6634	0.685	0.518593	low		0.8104	0.8766	0.0225	0.5	0.2406	0.3373	1.59548	high		0.0381	0.2055	0.404	0.8746
	TCGA-AK-3456	3.13151	0	0.8139	0.4866	0.2472	0.7912	0.5265	1.2284	high		0.3573	0.4948	0.4717	0.1637	0.0972	0.987356	high		0.1865	0.221	0.9531	0.6155	0.8646	0.7425	1.4611	high		0.4866	0.7138	0.0046	0.6896	0.2998	1.1416	high		0.8139	0.9402	0.096	0.2472	0.1724	0.1054	0.659539	low		0.09	0.074	0.28645	0.5265
	TCGA-AK-3458	3.2	0	0.4484	0.6088	0.7144	0.9513	0.6463	2.05853	high		0.7344	0.565	0.0881	0.8373	0.3583	2.02987	high		0.0955	0.3024	0.9505	0.352	0.9366	0.7191	0.828704	low		0.6088	0.3349	0	0.6275	0.9278	0.730114	low		0.4484	0.9193	0.0407	0.7144	0.2893	0.1032	1.23457	high		0.1393	0.151	0.2225	0.6463
	TCGA-AK-3460	6.87123	0	0.7677	0.6681	0.33	0.9571	0.7084	0.624867	low		0.4595	0.587	0.0837	0.369	0.2668	0.654301	low		0.0525	0.2727	0.8824	0.5029	0.93001	0.5357	0.81587	low		0.6681	0.452	0.0629	0.7672	0.8477	0.602978	low		0.7677	0.9269	0.0413	0.33	0.2389	0.1775	0.737816	low		0.11	0.1463	0.2323	0.7084
	TCGA-AK-3461	6.07397	0	0.593	0.7771	0.6388	0.941	0.7448	0.98362	high		0.4827	0.4696	0.2924	0.4107	0.1662	1.19408	high		0.1672	0.3436	0.8823	0.5786	0.935156	0.7631	1.54259	high		0.7771	0.3823	0.0828	0.568	0.7626	0.726507	low		0.593	0.8569	0.1366	0.6388	0.24	0.2034	2.18524	high		0.148	0.2886	0.1357	0.7448
	TCGA-AK-3465	1.01096	0	0.8909	0.7302	0.2627	0.8801	0.8686	0.380501	low		0.1982	0.7622	0.4214	0.1065	0.3123	0.676702	low		0.0888	0.1383	0.9182	0.5242	0.9057	0.5815	0.747458	low		0.7302	0.8608	0.5175	0.6822	0.8107	0.886217	high		0.8909	0.9283	0.0783	0.2627	0.2445	0.12	0.491428	low		0.0337	0.0526	0.5476	0.8686
	TCGA-AS-3777	3.39178	0	0.9336	0.7218	0.4945	0.8777	0.876	0.508394	low		0.3436	0.835	0.1582	0.2729	0.0986	0.29162	low		0.0568	0.1599	0.956	0.2592	0.7984	0.9132	1.3914	high		0.7218	0.8111	0	0.8446	0.4614	0.437827	low		0.9336	0.8831	0.0442	0.4945	0.2946	0.0955	0.483399	low		0.0358	0.1272	0.3675	0.876
	TCGA-AS-3778	0.117808	0	0.7648	0.4643	0.4448	0.9058	0.8587	0.925961	high		0.3223	0.5715	0.1537	0.3245	0.1247	0.501943	low		0.1232	0.2486	0.9791	0.6024	0.9694	0.4215	0.506584	low		0.4643	0.4375	0.0402	0.6811	0.873	0.95291	high		0.7648	0.8645	0.0651	0.4448	0.3492	0.1534	0.659235	low		0.0769	0.0998	0.1994	0.8587
	TCGA-B0-4688	0.276712	1	0.4729	0.1201	0.4707	0.6505	0.1353	11.6012	high		0.2589	0.0054	0.4734	0.6999	0.2336	5.81446	high		0.2669	0.4723	0.8256	0.7861	0.6062	0.8359	16.2309	high		0.1201	0.0226	0.6858	0.6056	0.1764	27.7561	high		0.4729	0.6716	0.1826	0.4707	0.2069	0.1944	3.9301	high		0.1842	0.7069	0.37237	0.1353
	TCGA-B0-4690	0.117808	1	0.5757	0.3451	0.3656	0.3471	0.2816	7.39402	high		0.5665	0.1177	0.2988	0.4479	0.2788	3.13723	high		0.2157	0.3787	0.8319	0.923	0.9081	0.8375	3.34375	high		0.3451	0.1935	0.3875	0.5283	0.2811	7.44256	high		0.5757	0.7704	0.4222	0.3656	0.2138	0.23	4.50766	high		0.1205	0.3651	0.4321	0.2816
	TCGA-B0-4691	0.380822	1	0.2019	0.3848	0.4848	0.8777	0.5241	4.11679	high		0.7513	0.4862	0.4044	0.6044	0.2109	2.7984	high		0.1011	0.3074	0.837	0.5788	0.925	0.8568	1.77414	high		0.3848	0.1298	0.1745	0.3218	0.6385	3.97432	high		0.2019	0.8306	0.0824	0.4848	0.2125	0.2182	3.5537	high		0.2169	0.3567	0.6397	0.5241
	TCGA-B0-4693	0.210959	1	0.7485	0.8606	0.3386	0.9244	0.8479	0.390308	low		0.4147	0.5696	0.2206	0.3398	0.2792	0.896852	high		0.1323	0.2869	0.942	0.7998	0.9122	0.7352	1.41393	high		0.8606	0.4858	0.0332	0.7672	0.8452	0.364687	low		0.7485	0.9043	0.0444	0.3386	0.2955	0.2147	0.770966	low		0.0986	0.1764	0.2031	0.8479
	TCGA-B0-4694	0.290411	1	0.8104	0.5351	0.4888	0.9321	0.7238	0.962202	high		0.4481	0.5255	0.3151	0.4966	0.0688	1.03611	high		0.0805	0.2277	0.9175	0.6933	0.7067	0.616	2.63046	high		0.5351	0.4965	0.1773	0.6989	0.7199	1.16857	high		0.8104	0.8423	0.1451	0.4888	0.2659	0.1758	1.16177	high		0.1205	0.26	0.1949	0.7238
	TCGA-B0-4696	2.3726	1	0.12	0.6709	0.1905	0.4119	0.1641	6.25436	high		0.6411	0.0218	0.4631	0.7528	0.1528	7.11438	high		0.16	0.3072	0.7535	0.5679	0.558	0.6672	10.8556	high		0.6709	0.0271	0.0148	0.3204	0.2081	2.93649	high		0.12	0.9105	0.12501	0.1905	0.2389	0.3181	3.40835	high		0.2446	0.6533	0.39967	0.1641
	TCGA-B0-4697	1.58356	1	0.2145	0.206	0.8127	0.569667	0.62592	12.4458	high		0.9743	0.11	0.321	0.8373	0.2962	8.64362	high		0.171	0.4856	0.8421	0.8811	0.915043	1	4.2295	high		0.206	0.0761	0.3437	0.4495	0.2985	11.2015	high		0.2145	0.7816	0.1571	0.8127	0.1237	0.3029	12.2558	high		0.279	0.1616	0.6449	0.62592
	TCGA-B0-4698	0.115068	1	0.1836	0.7643	0.8343	0.9054	0.1219	6.20003	high		0.6332	0.0095	0.4717	0.4673	0.3122	6.77172	high		0.2213	0.3362	0.8026	0.8023	0.6833	0.8738	9.46181	high		0.7643	0.0627	0.8204	0.5024	0.6109	6.00532	high		0.1836	0.8635	0.509	0.8343	0.1244	0.3167	25.1482	high		0.1602	0.4197	0.7722	0.1219
	TCGA-B0-4699	0.30137	1	0.8385	0.4398	0.4722	0.7185	0.5841	1.84327	high		0.512	0.435	0.4915	0.6157	0.3293	3.93791	high		0.2099	0.3675	0.9035	0.8307	0.932	0.7964	2.0764	high		0.4398	0.4999	0.1352	0.5941	0.5086	1.84077	high		0.8385	0.8175	0.1768	0.4722	0.1834	0.2162	1.87918	high		0.1274	0.2947	0.6854	0.5841
	TCGA-B0-4700	5.42466	1	0.8237	0.6034	0.5943	0.6147	0.441	2.42993	high		0.5061	0.1077	0.2324	0.4409	0.2312	2.30813	high		0.0935	0.2029	0.8823	0.8613	0.8052	0.3868	1.50164	high		0.6034	0.1785	0.0537	0.6724	0.1249	2.36215	high		0.8237	0.8449	0.1836	0.5943	0.1583	0.1769	1.99626	high		0.09	0.2827	0.4515	0.441
	TCGA-B0-4701	0.652055	1	0.7424	0.4842	0.6106	0.7322	0.6047	2.24303	high		0.3343	0.5249	0.2347	0.5627	0.1995	1.08936	high		0.1374	0.3426	0.8719	0.6889	0.9386	0.7976	1.69785	high		0.4842	0.4572	0.0432	0.7051	0.4707	1.38074	high		0.7424	0.8359	0.1014	0.6106	0.1782	0.2875	2.70856	high		0.1137	0.2714	0.4207	0.6047
	TCGA-B0-4703	0.49863	1	0.1203	0.3379	0.3279	0.9196	0.59078	3.36663	high		0.2042	0.0774	0.2599	0.6105	0.3564	3.23206	high		0.1133	0.2503	0.9415	0.521	0.8973	0.6003	0.935886	high		0.3379	0.104	0.2289	0.641	0.6314	3.72284	high		0.1203	0.8723	0.1038	0.3279	0.1567	0.262	4.47003	high		0.1024	0.7825	0.1585	0.59078
	TCGA-B0-4706	0.178082	1	0.5956	0.2963	0.6396	0.5744	0.5639	5.41053	high		0.6732	0.4833	0.2262	0.5682	0.4042	2.3422	high		0.2172	0.3637	0.8328	0.7069	0.935122	0.7425	2.14309	high		0.2963	0.1692	0.0359	0.3829	0.4839	3.89324	high		0.5956	0.8204	0.0951	0.6396	0.2447	0.2377	2.40127	high		0.2195	0.3395	0.6595	0.5639
	TCGA-B0-4707	1.64384	1	0.6169	0.1038	0.758	0	0.68609	17.834	high		0.8135	0.6428	0.4083	0.895	0.2515	3.72639	high		0.159	0.5066	0.9091	1	0.9336	0.8346	2.84696	high		0.1038	0.0852	0.0505	0.3815	0.2431	8.7641	high		0.6169	0.8411	0.0757	0.758	0.1538	0.2469	3.39832	high		0.2572	0.7094	1	0.68609
	TCGA-B0-4710	4.80822	0	0.5957	0.538	0.4084	0.8929	0.7328	1.18397	high		0.3424	0.3386	0.2598	0.5855	0.1391	1.47034	high		0.1162	0.2409	0.8941	0.5683	0.888	0.7894	1.4804	high		0.538	0.4991	0.0575	0.7498	0.7631	0.828395	high		0.5957	0.7561	0.1233	0.4084	0.2247	0.218	2.24993	high		0.1541	0.4088	0.3898	0.7328
	TCGA-B0-4712	3.66301	1	0.885	0.35	0.5655	0.8057	0.2601	3.32909	high		0.6056	0.0879	0.286	0.8017	0.2312	4.94861	high		0.1957	0.1992	1	0.5212	0.8876	0.6909	0.969715	high		0.35	0.1781	0.1638	0.7304	0.4304	3.34996	high		0.885	0.8719	0.2118	0.5655	0.1241	0.0827	1.41123	high		0.0303	0.3521	0.1215	0.2601
	TCGA-B0-4713	0.553425	1	0.7287	0.4175	0.4984	0.8645	0.8302	1.27143	high		0.6247	0.5722	0.2986	0.7023	0.7386	5.40657	high		0.083	0.324	1	0.4002	0.9476	0.8015	0.801403	low		0.4175	0.3889	0.1992	0.4216	0.49075	3.03132	high		0.7287	0.8828	0.0595	0.4984	0.1964	0.3487	2.32065	high		0.1512	0.1235	1	0.8302
	TCGA-B0-4714	0.271233	1	0.503	0.3779	0.4764	0.7362	0.9179	1.90187	high		0.6714	0.4644	0.3504	0.5914	0.2871	2.69833	high		0.2448	0.3823	0.9148	0.7307	0.8871	0.6623	2.08627	high		0.3779	0.1925	0.0596	0.249	0.7696	2.75418	high		0.503	0.7968	0.0871	0.4764	0.2592	0.2	1.96926	high		0.4661	0.228	0.5691	0.9179
	TCGA-B0-4718	4.87123	0	0.4385	0.3038	0.622	0.8271	0.7683	3.19038	high		0.7505	0.592	0.2347	0.4911	0.2918	1.52997	high		0.3052	0.3688	0.7393	0.7648	0.9379	0.8522	3.89527	high		0.3038	0.0872	0.0598	0.7132	0.4454	3.36466	high		0.4385	0.7156	0.172	0.622	0.2046	0.3047	6.50573	high		0.1749	0.21	0.4296	0.7683
	TCGA-B0-4810	1.30959	1	0.5717	0.6239	0.5497	0.635	0.6151	2.28153	high		0.6024	0.4607	0.2838	0.4473	0.2564	1.6619	high		0.154	0.2293	0.9564	0.529	0.8607	0.8611	1.55709	high		0.6239	0.2947	0.0479	0.3814	0.2611	2.20608	high		0.5717	0.8044	0.1498	0.5497	0.2199	0.1854	2.36552	high		0.2289	0.3128	0.4657	0.6151
	TCGA-B0-4811	3.88219	1	0.4389	0.324	0.6601	0.4597	0.7566	5.81905	high		0.6578	0.3027	0.2684	0.6359	0.6807	6.64142	high		0.4247	0.4227	0.8028	0.705	0.9778	1	4.11637	high		0.324	0.069	0.0563	0.2238	0.4089	5.50115	high		0.4389	0.7881	0.08	0.6601	0.1556	0.2745	4.94349	high		0.3899	0.2021	0.8582	0.7566
	TCGA-B0-4813	0.0493151	1	0.1942	0.6377	0.9149	0.62761	0.3995	8.73089	high		1	0.7405	0.527	0.6528	0.2161	3.32722	high		0.4839	0.2767	0.4545	0.5966	0.9315	1	11.1877	high		0.6377	0.0552	0.1185	0.2144	0.273375	3.84398	high		0.1942	0.4913	0.2307	0.9149	0.1356	0.2088	22.4821	high		0.32108	0.4806	0.8288	0.3995
	TCGA-B0-4814	0.460274	1	0.7113	0.5647	0.6094	0.8842	0.7787	1.2283	high		0.284	0.486	0.1794	0.4768	0.1729	0.815158	low		0.134	0.3147	0.732	0.5018	0.954	0.8638	2.13612	high		0.5647	0.478	0.0238	0.6395	0.8685	0.743503	low		0.7113	0.8948	0.1083	0.6094	0.2475	0.2927	2.03994	high		0.2339	0.2185	0.2736	0.7787
	TCGA-B0-4815	4.35068	1	0.618	0.4431	0.493	0.458	0.522	4.14073	high		0.6612	0.3291	0.3416	0.3398	0.3517	2.63059	high		0.2107	0.3744	0.8717	0.7214	0.8689	0.8738	3.17294	high		0.4431	0.2668	0.1533	0.431	0.1491	4.4479	high		0.618	0.8973	0.1319	0.493	0.1892	0.3181	2.84305	high		0.0691	0.2552	0.4735	0.522
	TCGA-B0-4816	3.75616	1	0.7937	0.4386	0.3258	0.912	0.6186	1.11593	high		0.3958	0.2807	0.271	0.3002	0.3511	1.78528	high		0.1972	0.4287	0.9743	0.3922	0.9452	0.6634	1.03527	high		0.4386	0.307	0.1417	0.6576	0.794	1.6154	high		0.7937	0.8841	0.0645	0.3258	0.2259	0.1649	0.818783	low		0.1313	0.3802	0.1827	0.6186
	TCGA-B0-4817	2.79178	1	0.785	0.1395	0.4944	0.1093	0.926	5.36929	high		0.908	0.3825	0.3543	0.47685	0.2541	3.08709	high		0.0912	0.4772	0.8784	0.4835	0.9272	0.8546	1.90101	high		0.1395	0.2251	0.009	0.3353	0	8.67505	high		0.785	0.8372	0.091	0.4944	0.1114	0.317	2.9874	high		0.056	0.2321	0.50647	0.926
	TCGA-B0-4818	1.39726	1	0.7498	0.5934	0.301	0.8645	0.7579	0.751482	low		0.4348	0.5226	0.2347	0.4169	0.2303	1.03638	high		0.0723	0.2733	0.8484	0.5375	0.93778	0.8188	1.3415	high		0.5934	0.479	0.0462	0.62	0.8249	0.782249	low		0.7498	0.8434	0.0659	0.301	0.269	0.1724	0.833771	low		0.1602	0.1479	0.1833	0.7579
	TCGA-B0-4819	0.50137	1	0.4153	0.5162	0.6752	0.4437	0.1871	10.4636	high		0.8726	0.2363	0.4327	0.6233	0.4955	9.24752	high		0.181	0.4329	0.903	0.7944	0.9003	0.8278	2.62012	high		0.5162	0.2297	0.2596	0.4673	0.3102	3.96135	high		0.4153	0.8311	0.13	0.6752	0.1226	0.2997	6.4397	high		0.471	0.2089	0.5743	0.1871
	TCGA-B0-4821	3.36986	1	0.3999	0.17	0.8165	0.5955	0.6139	10.2359	high		0.9475	0.3506	0.3817	0.7554	0.2576	5.38186	high		0.3729	0.3706	0.5701	1	0.9346	0.9285	9.59984	high		0.17	0.0892	0.2453	0.467	0.2431	10.2484	high		0.3999	0.652	0.2316	0.8165	0.0853	0.2632	14.6135	high		0.3553	0.6614	0.9237	0.6139
	TCGA-B0-4822	3.04384	1	0.479	0.7018	0.7545	0.4448	0.4154	5.4629	high		0.8369	0.1981	0.1833	0.6006	0.1757	2.63567	high		0.2763	0.324	0.9019	0.5836	0.9682	0.7142	1.34387	high		0.7018	0.2361	0.1267	0.484	0.563	1.51262	high		0.479	0.8294	0.096	0.7545	0.1991	0.3164	4.93374	high		0.3377	0.2923	0.5175	0.4154
	TCGA-B0-4823	1.24384	1	0.8857	0.8266	0.2829	0.9396	0.8375	0.316871	low		0.3277	0.491	0.0707	0.3325	0.0465	0.407272	low		0.0147	0.0848	0.9546	0.1465	0.9535	0.6422	0.353662	low		0.8266	0.6039	0.0451	0.7492	0.8222	0.361993	low		0.8857	0.9206	0.0062	0.2829	0.2887	0.1162	0.374761	low		0.0757	0.1637	0.1167	0.8375
	TCGA-B0-4824	4.53973	1	0.64	0.8371	0.4263	0.804	0.8591	0.632036	low		0.6377	0.5864	0.2905	0.2434	0.3491	1.27063	high		0.1916	0.2757	0.9441	0.7916	0.9001	1	2.26173	high		0.8371	0.2797	0.0594	0.4425	0.722522	0.820825	low		0.64	0.744	0.057	0.4263	0.2817	0.1746	1.35442	high		0.1784	0.1189	0.3584	0.8591
	TCGA-B0-4827	2.42466	1	0.8257	0.552	0.3959	0.542	0.7406	1.41848	high		0.2693	0.333	0.4864	0.3695	0.0586	1.54265	high		0.0608	0.2938	0.8852	0.1704	0.9061	0.7263	0.951073	high		0.552	0.5008	0.0435	0.6314	0.246	1.572	high		0.8257	0.9125	0.0415	0.3959	0.1687	0.0987	0.719101	low		0.0675	0.0999	0.0916	0.7406
	TCGA-B0-4828	0.841096	1	0.6646	0.4574	0.6017	0.7267	0.8457	1.80714	high		0.5287	0.6494	0.2505	0.5627	0.352	1.47475	high		0.1402	0.4524	0.9016	0.7467	0.93485	0.7758	1.95102	high		0.4574	0.2752	0.0897	0.5776	0.7811	1.59898	high		0.6646	0.8371	0.0845	0.6017	0.2458	0.2995	2.4168	high		0.2061	0.2805	1	0.8457
	TCGA-B0-4833	6.53699	1	0.5046	0.5699	0.6347	0.9503	0.78	1.49523	high		0.7619	0.5453	0.2224	0.4673	0.3544	1.77699	high		0.171	0.3344	0.795	0.774	0.921644	0.8538	2.75441	high		0.5699	0.2233	0.0131	0.4599	0.528633	1.72579	high		0.5046	0.8487	0.0853	0.6347	0.2244	0.2215	2.53103	high		0.2051	0.311	0.8582	0.78
	TCGA-B0-4834	5.72603	1	0.8933	0.6958	0.1979	0.6487	0.7939	0.586578	low		0.2272	0.8463	0.331	0.1201	0.4306	0.618489	low		0.1837	0.1711	0.9016	0.346	0.8991	0.8295	1.20551	high		0.6958	0.6527	0.0015	0.728	0.4863	0.614585	low		0.8933	0.9063	0.0651	0.1979	0.1564	0.1678	0.733515	low		0.1821	0.0389	0.0883	0.7939
	TCGA-B0-4836	3.39178	1	0.624	0.2865	0.3833	0.7613	0.5515	2.78941	high		0.4461	0.3091	0.3214	0.4017	0.3248	2.20847	high		0.0572	0.2295	0.944	0.7946	0.9418	0.578	0.795939	low		0.2865	0.4676	0.0713	0.6863	0.4678	2.23233	high		0.624	0.8598	0.1785	0.3833	0.3756	0.2448	1.25217	high		0.11	0.4386	0.139	0.5515
	TCGA-B0-4837	3.77534	1	0.7356	0.2921	0.6146	0.5246	0.5841	4.5764	high		0.5243	0.359	0.3046	0.6069	0.1582	1.99959	high		0.159	0.1752	0.9092	0.8226	0.8577	0.5266	1.33683	high		0.2921	0.2099	0.2468	0.7949	0.1869	5.29877	high		0.7356	0.8473	0.1207	0.6146	0.196	0.2038	1.9588	high		0.1061	0.054	0.2167	0.5841
	TCGA-B0-4838	2.28493	1	0.7579	0.6135	0.3637	0.9017	0.8468	0.649008	low		0.3468	0.4499	0.4563	0.6002	0.4417	3.70865	high		0.0918	0.2381	0.9329	0.3921	0.911	0.8871	1.12973	high		0.6135	0.4639	0.1068	0.6843	0.7794	0.851276	high		0.7579	0.8568	0.0916	0.3637	0.2011	0.2369	1.43155	high		0.0523	0.3285	0.4466	0.8468
	TCGA-B0-4839	4.49041	1	0.7753	0.3824	0.3692	1	0.8279	0.859669	high		0.7057	0.4649	0.1897	0.7202	0.1219	1.60694	high		0.0564	0.1681	1	0.2639	0.8021	0.8366	1.10412	high		0.3824	0.3145	0.0832	0.5989	0.644338	2.01302	high		0.7753	0.8429	0.037	0.3692	0.2136	0.0644	0.666556	low		0.0733	0.1384	0.1537	0.8279
	TCGA-B0-4842	4.72329	1	0.7038	0.6837	0.5497	0.8271	0.6341	1.24387	high		0.8024	0.2404	0.286	0.6318	0.17784	3.22468	high		0.4853	0.3511	1	0.34548	0.9502	0.8429	1.57659	high		0.6837	0.4241	0.0386	0.8193	0.526414	0.786699	low		0.7038	0.8267	0.1113	0.5497	0.0431	0.2165	3.3777	high		0.08775	0.1298	0.38299	0.6341
	TCGA-B0-4843	0.876712	1	0.6009	0.1474	0.672	0.21	0.4652	14.9887	high		0.6781	0.2494	0.3953	0.8283	0.2732	5.94252	high		0.2157	0.3179	0.9011	1	0.9261	0.8385	2.39743	high		0.1474	0.05	0.0189	0.2395	0.1848	9.62571	high		0.6009	0.8109	0.0968	0.672	0.1727	0.2309	3.13897	high		0.3372	0.3511	0.4296	0.4652
	TCGA-B0-4844	0.857534	1	0.7524	0.2649	0.6328	0.8271	0.5891	3.01003	high		0.6023	0.5436	0.2925	0.5412	0.2898	1.79708	high		0.1854	0.3074	0.9517	0.715	0.8768	0.6186	1.46817	high		0.2649	0.2949	0.0727	0.4148	0.7741	2.67374	high		0.7524	0.8155	0.1261	0.6328	0.2278	0.2406	2.18134	high		0.1578	0.3464	0.8288	0.5891
	TCGA-B0-4845	5.4411	1	0.533	0.6582	0.5731	0.695	0.8026	1.60549	high		0.3231	0.5677	0.3522	0.5346	0.3397	1.7066	high		0.1461	0.3414	0.9348	0.691	0.909	0.7561	1.55688	high		0.6582	0.2238	0.0155	0.5764	0.7406	1.0108	high		0.533	0.8313	0.0957	0.5731	0.3163	0.2514	1.97708	high		0.2413	0.2782	0.1623	0.8026
	TCGA-B0-4846	3.28767	1	0.797	0.7956	0.2803	0.9054	0.9454	0.336324	low		0.2054	0.465	0.2676	0.349	0.2383	0.934152	high		0.0898	0.378	0.8721	0.506	0.9592	0.6	1.01611	high		0.7956	0.5398	0.0557	0.6941	0.8698	0.427093	low		0.797	0.8276	0.0864	0.2803	0.2096	0.2108	1.14687	high		0.0812	0.2243	0.3035	0.9454
	TCGA-B0-4847	2.1726	1	0.6609	0.6605	0.7114	0.4267	0.8385	2.3652	high		0.8116	0.4208	0.3151	0.6587	0.3772	3.96235	high		0.2676	0.3352	1	1	0.904656	1	2.74772	high		0.6605	0.1514	0.2768	0.2319	0.2287	4.59595	high		0.6609	0.8035	0.0733	0.7114	0.1588	0.2828	3.65042	high		0.2028	0.3395	0.673	0.8385
	TCGA-B0-4848	2.41918	1	0.8335	0.5088	0.346	0.872	0.7269	0.867581	high		0.3461	0.3981	0.3403	0.3653	0.1307	1.177	high		0.1166	0.3077	0.9804	0.5	0.8143	0.8898	1.98184	high		0.5088	0.4475	0.1073	0.6859	0.702	1.18127	high		0.8335	0.8887	0.0976	0.346	0.2306	0.1967	0.928152	high		0.0158	0.3649	0.2664	0.7269
	TCGA-B0-4849	0.189041	1	0.5418	0.3934	0.4471	0.8645	0.8701	1.48509	high		0.5766	0.6358	0.2163	0.4739	0.2668	1.0786	high		0.1808	0.3736	0.8845	0.6648	0.9072	0.8638	2.29669	high		0.3934	0.2454	0.1256	0.3823	0.6922	2.72562	high		0.5418	0.8411	0.0674	0.4471	0.2297	0.239	1.96432	high		0.1852	0.3092	0.5755	0.8701
	TCGA-B0-4852	3.07123	1	0.7004	0.5603	0.3173	0.8439	0.7661	0.889201	high		0.363	0.4148	0.2613	0.5456	0.4628	2.37011	high		0.1852	0.3227	0.8785	0.4699	0.9503	0.7157	1.24527	high		0.5603	0.4633	0.0299	0.5674	0.6922	1.01271	high		0.7004	0.7797	0.0837	0.3173	0.2227	0.2365	1.61126	high		0.1139	0.2583	0.1891	0.7661
	TCGA-B0-4945	5.87671	1	0.7119	0.7632	0.2027	0.8677	0.7179	0.531767	low		0.2894	0.4313	0.2359	0.2754	0.3939	1.20937	high		0.0873	0.4007	0.8908	0.3646	0.926033	0.7782	1.3253	high		0.7632	0.5301	0.042	0.6438	0.7104	0.566442	low		0.7119	0.9329	0.0525	0.2027	0.2525	0.2771	0.952127	high		0.1891	0.3018	0.2949	0.7179
	TCGA-B0-5075	1.74521	1	0.8117	0.524	0.4675	0.7701	0.7243	1.21788	high		0.3881	0.6203	0.1487	0.1574	0.3545	0.603249	low		0.0989	0.197	0.9006	0.7113	0.9499	0.8255	1.14472	high		0.524	0.6449	0.0472	0.6957	0.7054	0.78553	low		0.8117	0.9203	0.0541	0.4675	0.2225	0.274	1.26126	high		0.1578	0.1593	0.6932	0.7243
	TCGA-B0-5077	3.60822	1	0.7603	0.4771	0.347	0.821	0.8323	0.935379	high		0.3325	0.5466	0.1463	0.4223	0.2566	0.772794	low		0.0591	0.266	0.9007	0.5167	0.9325	0.8817	1.22099	high		0.4771	0.357	0.0181	0.646	0.6887	1.25013	high		0.7603	0.8973	0.0706	0.347	0.2417	0.1865	0.889774	high		0.1535	0.2465	0.2792	0.8323
	TCGA-B0-5080	0.936986	1	0.4923	0.5459	0.2962	0.9503	0.1877	2.3619	high		0.4499	0.1284	0.346	0.6747	0.1768	3.50795	high		0.1031	0.2042	0.9067	0.2228	0.9048	0.8385	0.993835	high		0.5459	0.3755	0.07	0.8166	0.7551	0.91985	high		0.4923	0.8625	0.1115	0.2962	0.1848	0.1196	1.41182	high		0.1393	0.6728	0.108	0.1877
	TCGA-B0-5081	0.991781	1	0.5865	0.4544	0.5256	0.8217	0.5049	2.60145	high		0.5954	0.2311	0.2775	0.5736	0.4612	4.30695	high		0.0872	0.2524	0.8983	0.7772	0.9227	0.7505	1.34743	high		0.4544	0.288	0.1887	0.4955	0.6922	2.30627	high		0.5865	0.8233	0.1577	0.5256	0.1892	0.2527	3.08045	high		0.0936	0.2762	0.4614	0.5049
	TCGA-B0-5083	2.86301	1	0.8729	0.456	0.1434	0.8443	0.7208	0.710129	low		0.2478	0.6565	0.2176	0.5627	0.0369	0.559448	low		0.0597	0.1179	0.9793	0.1929	0.9598	0.4978	0.310164	low		0.456	0.8307	0.2359	0.7091	0.5949	1.16883	high		0.8729	0.8828	0.0442	0.1434	0.2895	0.1068	0.371501	low		0	0.1603	0.0511	0.7208
	TCGA-B0-5084	0.608219	1	0.7467	0.6336	0.5824	0.1412	0.1743	7.74353	high		0.709	0.5303	0.1456	0.7982	0.5261	3.20799	high		0.3098	0.3612	0.7826	0.5093	0.7449	0.9589	8.04946	high		0.6336	0.2403	0.076	0.6129	0.2386	1.99993	high		0.7467	0.8051	0.3229	0.5824	0.2017	0.1953	3.06064	high		0.1367	0.5497	0.8288	0.1743
	TCGA-B0-5085	2.10959	1	0.5892	0.7218	0.5611	0.5371	0.8552	1.53746	high		0.804	0.5942	0.2225	0.6389	0.3043	1.95597	high		0.2226	0.3267	0.7374	1	0.943586	0.9313	4.1428	high		0.7218	0.0836	0.0437	0.3229	0.2998	2.34229	high		0.5892	0.7884	0.1114	0.5611	0.2194	0.1953	2.30641	high		0.5743	0.128	0.9394	0.8552
	TCGA-B0-5088	1.54247	1	0.7092	0.5219	0.5088	0.7114	0.7865	1.48152	high		0.7102	0.557	0.2198	0.6336	0.2604	1.73222	high		0.0753	0.3291	0.9784	0.8201	0.922	0.8843	1.47713	high		0.5219	0.2834	0.0694	0.4671	0.4998	2.03203	high		0.7092	0.8535	0.0779	0.5088	0.1926	0.1634	1.41229	high		0.0782	0.1705	0.3456	0.7865
	TCGA-B0-5092	1.25753	1	0.4938	0.2838	0.5144	0.6458	0.5791	4.61776	high		0.7823	0.307	0.342	0.4768	0.3858	3.95016	high		0.1984	0.3947	0.8072	0.9659	0.93012	0.8654	3.4756	high		0.2838	0.1766	0.1087	0.4394	0.5125	4.18941	high		0.4938	0.838	0.0885	0.5144	0.1333	0.2625	3.59784	high		0.2626	0.3567	0.601	0.5791
	TCGA-B0-5094	0.912329	1	0.7858	0.1496	0.3984	0.8957	0.6693	2.01066	high		0.4641	0.4481	0.2514	0.3149	0.3696	1.43832	high		0.0885	0.5211	0.922	0.3876	0.6967	0.807	4.65864	high		0.1496	0.5171	0.0453	0.6278	0.8879	1.75269	high		0.7858	0.8886	0.1128	0.3984	0.2624	0.2743	1.30213	high		0.1038	0.3796	0.7385	0.6693
	TCGA-B0-5095	0.671233	1	0.3112	0.2837	0.2847	0.9108	0.1461	5.36588	high		0.2982	0.1715	0.3449	0.5187	0.2634	2.70753	high		0.1484	0.2847	0.8213	0.7169	0.9766	0.6775	1.32024	high		0.2837	0.1603	0.0738	0.6661	0.6314	2.79725	high		0.3112	0.897	0.1464	0.2847	0.2377	0.2508	2.44532	high		0.1919	0.6533	0.2276	0.1461
	TCGA-B0-5096	0.186301	1	0.2644	0.2346	0.0997	0.7384	0.4227	4.09381	high		0.4548	0.2506	0.3709	0.3116	0.053	1.43149	high		0.086	0.3511	0.8911	0.5391	0.9118	0.7053	1.3459	high		0.2346	0.2577	0.2853	0.313	0.5518	6.44326	high		0.2644	0.9349	0.2426	0.0997	0.1539	0.2007	2.6456	high		0.2087	0.2946	0.3262	0.4227
	TCGA-B0-5097	1.82192	0	0.9342	0.4263	0.4209	0.6815	0.5909	1.61852	high		0.19	0.1776	0.2985	0.6547	0.2419	2.51248	high		0.1108	0.2437	0.8619	0.5935	0.8937	0.6298	1.30164	high		0.4263	0.1828	0.0841	0.7283	0.4259	2.44108	high		0.9342	0.8752	0.1355	0.4209	0.1777	0.2585	1.45049	high		0.0358	0.2902	0.1537	0.5909
	TCGA-B0-5098	4.33973	1	0.8401	0.4432	0.673	0.6648	0.4408	3.30233	high		0.7154	0.2393	0.4208	0.2905	0.5239	5.14758	high		0.278	0.6989	0.8846	0.7201	0.8143	0.9541	8.53301	high		0.4432	0.3403	0.0482	0.478	0.549	2.00641	high		0.8401	0.8064	0.1672	0.673	0.043	0.3588	6.27076	high		0.3191	0.4645	0.9356	0.4408
	TCGA-B0-5099	1.32877	1	0.7553	0.5008	0.4442	0.771	0.8842	1.03819	high		0.3108	0.535	0.2749	0.5967	0.2908	1.45699	high		0.1766	0.1825	0.933	0.1692	0.9734	0.5531	0.472478	low		0.5008	0.3625	0.0133	0.626	0.7067	1.16912	high		0.7553	0.8602	0.0444	0.4442	0.2716	0.1893	0.944392	high		0.1932	0.2619	0.2103	0.8842
	TCGA-B0-5100	5.2411	1	0.4225	0.5001	0.5439	0.7052	0.3852	4.37395	high		0.8017	0.627	0.2712	0.736	0.5658	4.00997	high		0.221	0.2903	1	0.2449	0.9348	0.8219	0.909826	low		0.5001	0.1253	0.079	0.4779	0.2998	3.27003	high		0.4225	0.8549	0.1269	0.5439	0.1672	0.1048	2.2185	high		0.6091	0.3858	0.5375	0.3852
	TCGA-B0-5102	7.5726	1	0.6888	0.2959	0.3571	0.8852	0.8785	1.22426	high		0.5969	0.7339	0.1637	0.2047	0.417	0.752013	low		0.1159	0.2246	0.8811	0.5871	0.8989	0.7617	1.38822	high		0.2959	0.3558	0.0279	0.7319	0.8437	1.44288	high		0.6888	0.8774	0.0857	0.3571	0.2971	0.1258	0.72884	low		0.104	0.1199	0.3923	0.8785
	TCGA-B0-5104	0.00273973	1	0.8331	0.5035	0.3622	0.8677	0.8861	0.710851	low		0.1806	0.5113	0.3549	0.4457	0.2281	1.17867	high		0.0949	0.2483	0.9169	0.6477	0.9704	0.73	0.902229	low		0.5035	0.5707	0.0586	0.7666	0.83	0.745304	low		0.8331	0.8519	0.1036	0.3622	0.1976	0.1855	1.11779	high		0.1556	0.1406	0.5755	0.8861
	TCGA-B0-5106	4.37808	1	0.5562	0.3579	0.4598	0.8568	0.6941	2.08776	high		0.5886	0.465	0.1714	0.6291	0.2334	1.5173	high		0.1364	0.3652	0.9122	0.8076	0.930422	0.8823	1.99384	high		0.3579	0.193	0.1385	0.5242	0.7741	2.55161	high		0.5562	0.8349	0.1045	0.4598	0.244	0.2386	2.04914	high		0.1247	0.3477	0.2289	0.6941
	TCGA-B0-5107	2.53973	1	0.0552	0.6021	0.4338	0.7882	0.3603	4.5935	high		0.7859	0.4278	0.3022	0.3638	0.3036	2.11752	high		0.1416	0.3437	0.9147	0.6701	0.9255	0.9313	1.89127	high		0.6021	0	0.1341	0.3375	0.4539	3.30826	high		0.0552	0.8912	0.1544	0.4338	0.1185	0.3743	10.1117	high		0.0691	0.402	1	0.3603
	TCGA-B0-5108	4.88219	0	0.7823	0.3293	0.4197	0.941	0.338	2.31083	high		0.4928	0.387	0.2219	0.5412	0.2312	1.58863	high		0.1063	0.289	0.9383	0.7192	0.9145	0.7624	1.32832	high		0.3293	0.215	0.0922	0.7353	0.8126	1.8758	high		0.7823	0.8594	0.1102	0.4197	0.209	0.2059	1.33304	high		0.0918	0.1772	0.1238	0.338
	TCGA-B0-5109	1.60822	1	0.823	0.4725	0.666	0.9833	0.1491	3.01393	high		0.7313	0.5318	0.2916	0.7023	0.2312	2.29136	high		0.3159	0.4514	0.8295	0.5872	0.8608	1	5.35965	high		0.4725	0.2259	0.1304	0.6342	0.8068	1.63976	high		0.823	0.8103	0.1623	0.666	0.1111	0.2115	2.96241	high		0.1001	0.2658	0.3675	0.1491
	TCGA-B0-5110	5.50411	0	0.8112	0.7445	0.2426	0.914	0.7515	0.452841	low		0.2031	0.5434	0.211	0.5702	0.2822	1.05338	high		0.1209	0.2505	0.9459	0.2668	0.9469	0.4886	0.525374	low		0.7445	0.3802	0.0268	0.7653	0.7713	0.570654	low		0.8112	0.9003	0.0623	0.2426	0.2797	0.2358	0.748033	low		0.1118	0.1647	0.2766	0.7515
	TCGA-B0-5113	3.21918	0	0.7597	0.5548	0.3013	0.9617	0.645	0.812284	low		0.3264	0.3584	0.187	0.3514	0.4147	1.45216	high		0.0948	0.2895	0.8966	0.534	0.9203	0.7714	1.26161	high		0.5548	0.5286	0.1236	0.8424	0.9616	0.641228	low		0.7597	0.846	0.0701	0.3013	0.2179	0.2504	1.28701	high		0.1097	0.3559	0.139	0.645
	TCGA-B0-5115	4.39452	0	0.514	0.6078	0.4019	0.893	0.7841	1.06539	high		0.3467	0.5917	0.1347	0.4739	0.2871	0.804017	low		0.1478	0.3217	0.9092	0.6549	0.8807	0.7543	1.80472	high		0.6078	0.3219	0.0444	0.5898	0.7551	1.02338	high		0.514	0.8829	0.1036	0.4019	0.2785	0.1962	1.40016	high		0.2609	0.2926	0.2306	0.7841
	TCGA-B0-5116	3.49041	0	0.7972	0.497	0.2355	0.9661	0.4765	0.99817	high		0.2404	0.54	0.1712	0.4855	0.1902	0.733898	low		0.1312	0.3363	1	0.24	0.9717	0.6	0.533388	low		0.497	0.6	0.0243	0.9328	0.9427	0.509872	low		0.7972	0.9334	0.1691	0.2355	0.2919	0.1507	0.633191	low		0.0232	0.33	0.1268	0.4765
	TCGA-B0-5117	4.40548	0	0.8101	0.4978	0.2232	0.8271	0.7336	0.809346	low		0.5125	0.868	0.4083	0.3554	0.2533	0.913325	high		0.1653	0.1653	0.8838	0.715	0.9451	0.6197	0.98618	high		0.4978	0.7515	0.2931	0.5633	0.6306	1.46313	high		0.8101	0.9217	0.1072	0.2232	0.1239	0.1266	0.872363	high		0.10736	0.1569	0.2664	0.7336
	TCGA-B0-5119	4.25205	0	0.8615	0.6343	0.2505	0.9788	0.8621	0.40112	low		0.2344	0.6646	0.1493	0.3358	0.047	0.341117	low		0.0901	0.289	0.9412	0.108	0.9581	0.5593	0.500549	low		0.6343	0.63	0.0231	0.8802	0.9643	0.377101	low		0.8615	0.9104	0.0431	0.2505	0.3653	0.147	0.360862	low		0.0519	0.1116	0.0883	0.8621
	TCGA-B0-5120	3.20274	0	0.7975	0.7379	0.2509	0.9124	0.6818	0.525876	low		0.3352	0.5309	0.1703	0.5027	0.2155	0.871777	low		0.1084	0.3171	0.9683	0.4211	0.8937	0.5673	0.868747	low		0.7379	0.3712	0.0599	0.6493	0.8888	0.612436	low		0.7975	0.8801	0.0393	0.2509	0.3025	0.1923	0.60967	low		0.1042	0.2414	0.1466	0.6818
	TCGA-B0-5121	4.06849	0	0.7716	0.5676	0.3975	0.7995	0.7122	1.04275	high		0.465	0.6248	0.174	0.4252	0.546	1.45322	high		0.0743	0.2161	0.9381	0.2882	0.9432	0.8219	0.758413	low		0.5676	0.3346	0.0334	0.5725	0.794	1.04422	high		0.7716	0.8507	0.0967	0.3975	0.2371	0.1811	1.09056	high		0.0704	0.2396	0.1794	0.7122
	TCGA-B0-5399	3.86575	0	0.6946	0.5793	0.4695	0.8404	0.908	0.877863	high		0.2568	0.4975	0.2084	0.6218	0.2196	1.12761	high		0.2075	0.2503	0.8281	0.4499	0.9427	0.4838	0.990463	high		0.5793	0.4722	0.037	0.7921	0.8371	0.665465	low		0.6946	0.8989	0.0538	0.4695	0.2077	0.1982	1.26755	high		0.11	0.2142	0.2017	0.908
	TCGA-B0-5400	4.74795	0	0.8143	0.5403	0.5266	0.8886	0.7219	1.07446	high		0.7342	0.1785	0.4682	0.5627	0.6005	11.1448	high		0.0745	0.299	0.9667	0.6701	0.93246	0.9323	1.31156	high		0.5403	0.3328	0.0607	0.5096	0.61785	1.51772	high		0.8143	0.8559	0.0917	0.5266	0.1367	0.1613	1.50737	high		0.2289	0.1691	1	0.7219
	TCGA-B0-5402	3.53425	0	0.797	0.5948	0.3172	0.9033	0.8038	0.634052	low		0.2083	0.4829	0.1374	0.1766	0.2312	0.507999	low		0.079	0.3028	0.944	0.5871	0.9453	0.642	0.853869	low		0.5948	0.5132	0.0287	0.7616	0.8777	0.592684	low		0.797	0.8711	0.1555	0.3172	0.2937	0.1635	0.811427	low		0.1888	0.3342	0.0616	0.8038
	TCGA-B0-5690	9.29315	0	0.8045	0.6897	0.3149	0.9349	0.6437	0.638633	low		0.2856	0.5135	0.1779	0.3735	0.1037	0.585344	low		0.0781	0.2013	0.9333	0.2473	0.9526	0.4479	0.425673	low		0.6897	0.3076	0.0041	0.6775	0.7532	0.744892	low		0.8045	0.866	0.0643	0.3149	0.2923	0.1573	0.648624	low		0.0512	0.2088	0.087	0.6437
	TCGA-B0-5691	9.4	0	0.9072	0.795	0.1472	0.9483	0.763	0.295326	low		0.2308	0.5077	0.1824	0.1714	0.0834	0.411858	low		0.0791	0.1495	0.9345	0.1193	0.9011	0.6521	0.58957	low		0.795	0.4402	0.0325	0.7863	0.8249	0.444285	low		0.9072	0.8896	0.0825	0.1472	0.2773	0.1187	0.412926	low		0.0182	0.0403	0.017	0.763
	TCGA-B0-5692	10.8055	0	0.8996	0.7597	0.2686	0.8886	0.8265	0.378219	low		0.4045	0.5016	0.1168	0.1829	0.1141	0.445511	low		0.0495	0.1781	0.972	0.023	0.9761	0.6401	0.339797	low		0.7597	0.6719	0.0828	0.8182	0.7371	0.424804	low		0.8996	0.8973	0.0396	0.2686	0.3093	0.1053	0.368904	low		0.0849	0.2905	0.1474	0.8265
	TCGA-B0-5693	11.1616	0	0.8915	0.6568	0.3202	0.9445	0.7745	0.492868	low		0.1773	0.6187	0.0614	0.2211	0.0922	0.262036	low		0.0557	0.241	0.9321	0.2766	0.9649	0.6809	0.580563	low		0.6568	0.4308	0.0099	0.8668	0.8945	0.491437	low		0.8915	0.9079	0.0427	0.3202	0.2393	0.1526	0.580475	low		0.0797	0.1011	0.0819	0.7745
	TCGA-B0-5694	1.31507	1	0.8269	0.7602	0.1962	0.8967	0.3942	0.708446	low		0.4039	0.5102	0.2347	0.3915	0.0617	0.711553	low		0.0802	0.281	0.9709	0.3017	0.9522	1	0.95339	high		0.7602	0.5766	0.0562	0.752	0.7573	0.472331	low		0.8269	0.9026	0.1244	0.1962	0.2286	0.1323	0.647534	low		0.0691	0.1505	0.1694	0.3942
	TCGA-B0-5695	5.89041	0	0.7962	0.8321	0.3335	0.9467	0.8823	0.35147	low		0.2963	0.7207	0.1363	0.3525	0.0459	0.323962	low		0.0978	0.1511	0.948	0.0331	0.9161	0.5958	0.473593	low		0.8321	0.551	0.0159	0.9144	0.9485	0.26614	low		0.7962	0.8316	0.0649	0.3335	0.3225	0.0957	0.529045	low		0.094	0.1221	0.1173	0.8823
	TCGA-B0-5696	7.14795	0	0.8897	0.7895	0.2988	0.7756	0.7214	0.528777	low		0.2982	0.3479	0.1447	0.3535	0.1013	0.699246	low		0.0487	0.1316	0.9543	0.0481	0.9432	0.5702	0.358135	low		0.7895	0.6536	0.0204	0.8325	0.5518	0.438732	low		0.8897	0.9023	0.0702	0.2988	0.2552	0.1023	0.485325	low		0.0241	0.249	0.2498	0.7214
	TCGA-B0-5697	7.20548	0	0.879	0.8825	0.194	0.8857	0.553	0.423015	low		0.3049	0.5992	0.2847	0.4502	0.0959	0.736814	low		0.084	0.1635	1	0.2127	0.8884	0.8628	0.7574	low		0.8825	0.623	0.149	0.7431	0.6761	0.457723	low		0.879	0.9039	0.0516	0.194	0.1976	0.1194	0.535153	low		0.054	0.1755	0.4365	0.553
	TCGA-B0-5698	9.94795	0	0.8518	0.7249	0.2919	0.9273	0.7408	0.475848	low		0.3925	0.5528	0.2412	0.4237	0.0832	0.726794	low		0.0906	0.1419	1	0.1775	0.8507	0.876	0.872961	low		0.7249	0.5271	0.1484	0.8019	0.876	0.54036	low		0.8518	0.9028	0.0653	0.2919	0.2742	0.1191	0.502021	low		0.0381	0.2346	0.0539	0.7408
	TCGA-B0-5699	10.5233	0	0.8639	0.7001	0.4193	0.8271	0.9255	0.521167	low		0.1457	0.6443	0.0951	0.117	0.1155	0.240074	low		0.0612	0.1767	0.9327	0.201	0.9542	0.659	0.504731	low		0.7001	0.7306	0.0214	0.9186	0.6395	0.401745	low		0.8639	0.9465	0.0544	0.4193	0.2654	0.2129	0.726161	low		0.0198	0.0855	0.1552	0.9255
	TCGA-B0-5700	4.90411	0	0.9168	0.8417	0.3544	0.9461	0.8678	0.31071	low		0.3466	0.5757	0.046	0.4288	0.0456	0.385119	low		0.0621	0.1451	0.9471	0	0.9513	0.7273	0.436934	low		0.8417	0.5278	0.0168	0.8718	0.8477	0.314103	low		0.9168	0.9056	0.0266	0.3544	0.3035	0.094	0.370979	low		0.0407	0.1051	0.2167	0.8678
	TCGA-B0-5701	6.74247	0	0.7549	0.5517	0.3596	0.6973	0.808	1.05161	high		0.3245	0.3771	0.2415	0	0.0859	0.512439	low		0.0762	0.251	0.9851	0.6492	0.8244	0.8188	1.61832	high		0.5517	0.7231	0.0083	0.7921	0.414	0.788316	low		0.7549	0.9357	0.0853	0.3596	0.1785	0.0887	0.74885	low		0.0619	0.2974	0.1949	0.808
	TCGA-B0-5703	6.15342	0	0.8983	0.3416	0.4199	0.9849	0.8941	0.785055	low		0.3446	0.4165	0.1829	0.3638	0.0567	0.662515	low		0.0302	0.138	0.9544	0.1789	0.9588	0.6045	0.377783	low		0.3416	0.4646	0	0.8372	0.9435	0.874075	high		0.8983	0.9187	0.0824	0.4199	0.3382	0.215	0.621325	low		0.0714	0.0291	0.1827	0.8941
	TCGA-B0-5705	12.4301	0	0.9114	0.7882	0.169	0.9105	0.8828	0.271638	low		0.1619	0.612	0.1094	0.4502	0.0668	0.386511	low		0.0469	0.0883	0.9359	0.0498	0.94056	0.5518	0.34618	low		0.7882	0.7913	0.0215	0.9732	0.8605	0.228718	low		0.9114	0.9522	0.0607	0.169	0.318	0.1342	0.321088	low		0.0437	0.0703	0.1215	0.8828
	TCGA-B0-5706	8.78082	0	0.9698	0.7022	0.3526	0.9503	0.5222	0.621921	low		0.392	0.2974	0.213	0.33246	0.0661	0.890051	high		0.1521	0.1089	1	0.4942	0.9044	0.5984	0.620592	low		0.7022	0.4914	0	0.5442	0.76909	0.641396	low		0.9698	0.9031	0.0883	0.3526	0.2332	0.1595	0.627918	low		0	0.1463	0.18368	0.5222
	TCGA-B0-5707	10.2575	0	0.8991	0.6083	0.2118	0.865	0.3855	0.923012	high		0.4568	0.7159	0.2634	0.398	0.0639	0.572034	low		0.044	0.1749	0.9659	0.3503	0.8981	0.6723	0.660712	low		0.6083	0.769	0.0698	0.961	0.7945	0.411814	low		0.8991	0.9123	0.0547	0.2118	0.1745	0.0794	0.490136	low		0.0429	0.2009	0.28447	0.3855
	TCGA-B0-5709	10.8877	0	0.837	0.5541	0.2401	0.9672	0.6819	0.63005	low		0.2333	0.3375	0.1084	0.3002	0.0873	0.553674	low		0.0694	0.1662	0.9776	0.1545	0.9171	0.7683	0.585195	low		0.5541	0.4549	0.1148	0.9004	0.932	0.675534	low		0.837	0.9151	0.0329	0.2401	0.2395	0.1842	0.616892	low		0.055	0.1952	0.1856	0.6819
	TCGA-B0-5710	6.65753	0	0.7672	0.7834	0.3091	0.9238	0.5922	0.617014	low		0.2869	0.3704	0.099	0.4026	0.0847	0.616071	low		0.1119	0.1902	0.9068	0.4719	0.8995	0.7878	1.14002	high		0.7834	0.3395	0.0024	0.5161	0.8044	0.647244	low		0.7672	0.8808	0.0705	0.3091	0.2859	0.1572	0.681623	low		0.0963	0.2483	0.1162	0.5922
	TCGA-B0-5711	10.9288	0	0.8495	0.8627	0.2618	0.9914	0.725	0.330216	low		0.2361	0.566	0.0749	0.2573	0.0581	0.307293	low		0.0504	0.2559	0.9635	0.1481	0.9523	0.5261	0.422067	low		0.8627	0.5237	0.0318	0.8025	0.9776	0.287424	low		0.8495	0.9283	0.0465	0.2618	0.2854	0.1849	0.535614	low		0.0117	0.1924	0.0434	0.725
	TCGA-B0-5712	7.45753	0	0.8245	0.8112	0.2403	0.8719	0.8794	0.345846	low		0.492	0.5731	0.0913	0.4911	0.1151	0.617745	low		0.0635	0.218	0.9483	0.2009	0.9609	0.8285	0.630272	low		0.8112	0.7768	0.0202	0.6027	0.5503	0.450929	low		0.8245	0.9206	0.0242	0.2403	0.188	0.1513	0.641412	low		0.0849	0.1514	0.1167	0.8794
	TCGA-B0-5713	7.62192	0	0.855	0.8159	0.1186	0.9632	0.9134	0.227703	low		0.1172	0.5529	0.1624	0.6218	0.1396	0.689074	low		0.0726	0.1522	0.9123	0.1505	0.9786	0.6818	0.462197	low		0.8159	0.6271	0.0045	0.8314	0.96	0.262307	low		0.855	0.9089	0.0364	0.1186	0.3305	0.1143	0.307967	low		0.0521	0.1463	0.2664	0.9134
	TCGA-B0-5812	10.5041	0	0.8512	0.9342	0.2418	0.9685	0.7506	0.280181	low		0.2334	0.4306	0.0656	0.3721	0.084	0.466534	low		0.0634	0.1361	0.9515	0.1229	0.9383	0.5648	0.400587	low		0.9342	0.4874	0.0369	0.7946	0.9491	0.271854	low		0.8512	0.9045	0.0503	0.2418	0.3019	0.1419	0.451876	low		0.0828	0.1917	0.0511	0.7506
	TCGA-B2-3923	2.71781	0	0.8794	0.5205	0.197	0.7476	0.7757	0.723633	low		0.2977	0.854	0.4858	0.2697	0.2257	0.786741	low		0.0704	0.149	0.9039	0.5372	0.8691	0.6856	1.06356	high		0.5205	0.9058	0.4963	0.8975	0.4353	1.54883	high		0.8794	0.9535	0.0967	0.197	0.263	0.1532	0.482138	low		0.0471	0.1587	0.7722	0.7757
	TCGA-B2-3924	2.99178	0	0.3608	0.9085	0.2204	0.7547	0.69055	0.826286	low		0.4079	0.6113	0.503	0.62418	0.3297	2.76919	high		0.6941	0.4635	0.8209	0.8585	0.9357	0.8015	6.72569	high		0.9085	0.115	0.0308	0.2431	0.6817	1.04087	high		0.3608	0.5402	0.1522	0.2204	0.2786	0.1621	3.08213	high		0.3845	0.3462	0.7771	0.69055
	TCGA-B2-4098	0.139726	1	0.7458	0.5165	0.516	0.2966	0.2135	6.45823	high		0.3782	0.5886	0.3781	0.5027	0.583	2.85756	high		0.2327	0.2657	0.795	0.8555	0.9418	0.8097	2.45935	high		0.5165	0.679	0.0671	0.4762	0.1411	1.86493	high		0.7458	0.9145	0.028	0.516	0.1422	0.337	2.2935	high		0.0619	0.2465	0.8971	0.2135
	TCGA-B2-4099	2.66301	0	0.8745	0.5863	0.3534	0.9146	0.8385	0.571638	low		0.2005	0.4543	0.083	0.407	0.3614	0.826705	low		0.0591	0.2609	0.9185	0.2969	0.9245	0.446	0.565703	low		0.5863	0.4101	0.0849	0.7983	0.9093	0.712912	low		0.8745	0.8958	0.0439	0.3534	0.2313	0.2334	0.873217	high		0.1496	0.1889	0.2531	0.8385
	TCGA-B2-4101	1.77534	0	0.7151	0.7646	0.4014	0.6868	0.5529	1.19509	high		0.2638	0.5005	0.1615	0.347	0.2068	0.665781	low		0.1209	0.3354	0.8322	0.7418	0.9617	0.7009	1.50761	high		0.7646	0.3791	0.044	0.7531	0.4866	0.791044	low		0.7151	0.9193	0.1002	0.4014	0.2253	0.2728	1.47874	high		0.1253	0.2569	0.3376	0.5529
	TCGA-B2-4102	2.60822	0	0.7949	0.7549	0.2816	0.8356	0.8013	0.503062	low		0.2452	0.4549	0.2347	0.079	0.4302	0.908274	high		0.1895	0.3153	0.8968	0.3628	0.9613	0.7744	1.10942	high		0.7549	0.4881	0.1059	0.6765	0.7592	0.631287	low		0.7949	0.9228	0.0547	0.2816	0.2467	0.2435	0.858094	high		0.0878	0.227	0.3577	0.8013
	TCGA-B2-5633	2.63836	0	0.7999	0.6563	0.2492	0.8788	0.5778	0.746558	low		0.191	0.3936	0.2431	0.2224	0.0966	0.619563	low		0.0997	0.1936	0.9478	0.4442	0.8818	0.4508	0.678833	low		0.6563	0.5018	0.0713	0.6245	0.6727	0.827698	high		0.7999	0.929	0.0472	0.2492	0.1723	0.1856	0.82607	low		0.0437	0.3979	0.071	0.5778
	TCGA-B2-5635	2.06849	0	0.8309	0.6325	0.2315	0.9204	0.7565	0.522649	low		0.3268	0.4481	0.185	0.3067	0.1638	0.708793	low		0.1171	0.2098	0.9148	0.5538	0.8877	0.5984	1.01639	high		0.6325	0.463	0.0875	0.7176	0.8497	0.704766	low		0.8309	0.9055	0.0103	0.2315	0.2567	0.1927	0.583392	low		0.0619	0.3612	0.3009	0.7565
	TCGA-B2-5636	2.51781	0	0.8713	0.7622	0.1779	0.9824	0.4576	0.516437	low		0.2132	0.6051	0.2635	0.1702	0.0994	0.433358	low		0.0712	0.1832	0.9209	0.1128	0.9554	0.3906	0.349393	low		0.7622	0.5332	0.0351	0.821	0.9255	0.368025	low		0.8713	0.9141	0.0902	0.1779	0.239	0.1658	0.582482	low		0.0691	0.5069	0.1297	0.4576
	TCGA-B2-5639	2.74795	1	0.9525	0.8168	0.2505	0.6002	0.7909	0.509189	low		0.2147	0.4188	0.2565	0.1944	0.0477	0.547061	low		0.1082	0.1413	0.9778	0.1929	0.8573	0.5984	0.649101	low		0.8168	0.7974	0.0291	0.9478	0.5623	0.311519	low		0.9525	0.9399	0.0889	0.2505	0.2685	0.2857	0.733892	low		0.1024	0.1446	0.492	0.7909
	TCGA-B2-5641	1.79726	0	0.8628	0.6789	0.3507	0.9723	0.6602	0.585161	low		0.237	0.5874	0.2273	0.1035	0.0629	0.353073	low		0.0657	0.2192	0.9908	0.1941	0.9614	0.5528	0.385047	low		0.6789	0.719	0.0955	0.8491	0.9435	0.374351	low		0.8628	0.9491	0.0422	0.3507	0.335	0.1644	0.434719	low		0.0298	0.2552	0.1144	0.6602
	TCGA-B2-A4SR	1.38904	0	0.7485	0.7462	0.2945	0.9092	0.7999	0.495451	low		0.2708	0.5357	0.2553	0.3794	0.1121	0.691905	low		0.1259	0.3239	0.8841	0.5276	0.949	0.5661	0.964477	high		0.7462	0.4657	0.0185	0.7684	0.6236	0.592887	low		0.7485	0.92	0.054	0.2945	0.3469	0.1521	0.487891	low		0.0518	0.2678	0.1763	0.7999
	TCGA-B4-5377	1	0	0.9026	0.4309	0.456	0.969	0.8783	0.734508	low		0.2295	0.7504	0.155	0.3525	0.0613	0.313429	low		0.0809	0.1927	0.9521	0.2673	0.9505	0.5671	0.478904	low		0.4309	0.6713	0.1151	0.8952	0.9445	0.664403	low		0.9026	0.9149	0.0829	0.456	0.2869	0.1637	0.641391	low		0.0552	0.1266	0.1804	0.8783
	TCGA-B4-5378	0.479452	0	0.8244	0.5894	0.1256	0.9586	0.4501	0.730315	low		0.1965	0.7301	0.1682	0.2327	0.1505	0.328429	low		0.0438	0.1966	0.9635	0.1121	0.9752	0.5932	0.360034	low		0.5894	0.5726	0.0058	0.8421	0.9507	0.453242	low		0.8244	0.8822	0.0732	0.1256	0.2808	0.2017	0.602776	low		0.0252	0.4703	0.2136	0.4501
	TCGA-B4-5834	0.10411	0	0.8957	0.7862	0.1941	1	0.8146	0.278799	low		0.2845	0.4917	0.0583	0.4479	0.0836	0.48015	low		0.0414	0.1918	0.9313	0.1699	0.9502	0.6352	0.48625	low		0.7862	0.5414	0.0106	0.8062	0.972	0.317683	low		0.8957	0.8945	0.0506	0.1941	0.3033	0.1291	0.389315	low		0.0188	0.1603	0.0818	0.8146
	TCGA-B4-5835	0.0438356	0	0.8935	0.5821	0.8217	0.52	0.9102	1.8324	high		0.4117	0.5393	0.2609	0.0328	0.2312	0.61574	low		0.1416	0.2931	0.925	0.3707	0.8564	0.7624	1.48267	high		0.5821	0.8318	0.0474	0.8871	0.0801	0.928218	high		0.8935	0.8579	0.0556	0.8217	0.1461	0.1586	1.66867	high		0.0337	0.0735	0.5923	0.9102
	TCGA-B4-5836	0.386301	0	0.8827	0.8175	0.317	0.9273	0.8244	0.35331	low		0.207	0.459	0.1777	0.4412	0.0504	0.592184	low		0.0704	0.1489	0.9434	0.1733	0.9455	0.4911	0.386167	low		0.8175	0.4919	0.0235	0.7534	0.794	0.41756	low		0.8827	0.854	0.0471	0.317	0.1954	0.1545	0.778645	low		0.1205	0.1848	0.1427	0.8244
	TCGA-B4-5838	0.454795	0	0.8038	0.7817	0.1997	0.7148	0.8261	0.487494	low		0.1194	0.5919	0.1486	0.3554	0.1361	0.426539	low		0	0.2271	0.9694	0.2136	0.9573	0.6613	0.448236	low		0.7817	0.3653	0.0172	0.4697	0.7199	0.745706	low		0.8038	0.9176	0.0134	0.1997	0.1797	0.1792	0.703571	low		0	0.2838	0.15991	0.8261
	TCGA-B4-5843	0.030137	0	0.7892	0.8735	0.2342	0.9451	0.8002	0.322935	low		0.3443	0.6227	0.1608	0.3463	0.0993	0.468181	low		0.1319	0.1513	0.9528	0.1978	0.9069	0.7326	0.699737	low		0.8735	0.3434	0.014	0.5533	0.8885	0.478071	low		0.7892	0.8845	0.0378	0.2342	0.2416	0.1415	0.608908	low		0.1061	0.1758	0.0422	0.8002
	TCGA-B4-5844	0.0191781	0	0.8377	0.8105	0.2007	0.9571	0.7612	0.336623	low		0.2679	0.468	0.2127	0.3188	0.0753	0.594624	low		0.0548	0.184	0.9554	0.0854	0.96	0.5602	0.369871	low		0.8105	0.5633	0.0025	0.7387	0.8709	0.346165	low		0.8377	0.8833	0.0672	0.2007	0.258	0.1458	0.561083	low		0.0457	0.197	0.1301	0.7612
	TCGA-B8-4143	1.94247	1	0.3512	0.2226	0.7026	0.8222	0.61053	5.96023	high		0.6684	0.3466	0.1687	0.5928	0.5272	3.36801	high		0.304	0.3692	0.8408	0.8815	0.9301	0.9277	3.62119	high		0.2226	0.0999	0.356	0.2054	0.8746	7.12071	high		0.3512	0.8139	0.1041	0.7026	0.2367	0.3161	5.23592	high		0.09	0.4213	0.3837	0.61053
	TCGA-B8-4146	1.4	0	0.946	0.9253	0.0659	0.8777	0.9074	0.176501	low		0.3275	0.6024	0.1592	0.36007	0.1307	0.515933	low		0	0.1179	1	0.3497	0.9078	0.8583	0.6183	low		0.9253	0.5142	0.003	0.5709	0.8525	0.347703	low		0.946	0.8408	0.0097	0.0659	0.3791	0.2094	0.332582	low		0.1544	0.1068	0.17235	0.9074
	TCGA-B8-4148	4.16438	0	0.8171	0.4919	0.4211	0.8886	0.7869	0.908456	high		0.276	0.5561	0.2282	0.3149	0.2899	0.815093	low		0.1502	0.2931	0.9767	0.6008	0.9073	0.5458	0.907595	low		0.4919	0.4756	0.0804	0.8616	0.7626	0.88209	high		0.8171	0.9066	0.0616	0.4211	0.2625	0.203	0.84707	high		0.0922	0.167	0.3023	0.7869
	TCGA-B8-4151	3.5589	0	0.9078	0.4547	0.5076	1	0.9774	0.618748	low		0.4193	0.7246	0.0842	0.1386	0.2312	0.337179	low		0.0668	0.2859	0.9703	0.3146	0.9736	0.7472	0.61546	low		0.4547	0.672	0.0562	0.9395	1	0.505644	low		0.9078	0.8949	0.048	0.5076	0.2961	0.1124	0.529232	low		0.1354	0.0293	0.2511	0.9774
	TCGA-B8-4153	2.08767	0	0.7633	0.7376	0.5748	0.8886	0.9213	0.638798	low		0.5052	0.5519	0.0937	0.4457	0.123	0.621392	low		0.2323	0.2241	1	0.3386	0.9083	0.6385	0.788654	low		0.7376	0.4146	0.1242	0.5788	0.695789	0.87839	high		0.7633	0.7754	0.0986	0.5748	0.2505	0.1698	1.49132	high		0.0619	0.0577	0.2906	0.9213
	TCGA-B8-4154	3.78082	0	0.8571	0.6769	0.4709	0.9726	0.824	0.550847	low		0.5496	0.6397	0.0906	0.4107	0.0296	0.437064	low		0.0861	0.1948	1	0.1469	0.9615	0.4309	0.304287	low		0.6769	0.3213	0.02	0.7949	0.955	0.551186	low		0.8571	0.8723	0.0277	0.4709	0.299	0.087	0.498064	low		0.0822	0.1275	0.1268	0.824
	TCGA-B8-4619	1.43288	0	0.9145	0.6332	0.2532	0.8948	0.8136	0.460551	low		0.2877	0.7845	0.4575	0.0439	0.2388	0.611513	low		0.049	0.278	0.8788	0.4649	0.9201	0.6879	1.03107	high		0.6332	0.7517	0.0037	0.7141	0.794	0.446101	low		0.9145	0.877	0.0474	0.2532	0.1321	0.2199	1.0159	high		0.0437	0.0281	0.1215	0.8136
	TCGA-B8-4620	2.12877	0	0.4018	0.2752	0.4643	0.9116	0.2984	4.99076	high		0.4279	0.5479	0.2128	0.6202	0.3601	1.60644	high		0.1416	0.2925	0.9395	0.7307	0.9223	0.7326	1.31518	high		0.2752	0.3497	0.1399	0.5637	0.8092	2.32027	high		0.4018	0.749	0.1164	0.4643	0.134	0.1918	3.94322	high		0.1061	0.4492	0.108	0.2984
	TCGA-B8-4621	2.1589	0	0.8807	0.4483	0.2563	0.797	0.7299	0.891518	high		0.2423	0.6684	0.3855	0.4563	0.1472	0.889356	high		0.082	0.2317	0.9185	0.5756	0.938	0.7505	0.96948	high		0.4483	0.7937	0.0575	0.602	0.7257	0.837594	high		0.8807	0.9046	0.188	0.2563	0.2737	0.2581	0.992494	high		0.0988	0.0592	0.30325	0.7299
	TCGA-B8-4622	4.17808	0	0.7578	0.5271	0.279	0.9164	0.8227	0.680052	low		0.249	0.4705	0.3151	0.2868	0.1649	0.858546	low		0.1142	0.2732	0.9246	0.6182	0.9563	0.736	0.999621	high		0.5271	0.5369	0.148	0.7869	0.906	0.793556	low		0.7578	0.882	0.1687	0.279	0.2129	0.2458	1.444	high		0.1652	0.2221	0.2149	0.8227
	TCGA-B8-5158	3.33699	0	0.927	0.5158	0.3693	0.9193	0.6273	0.846289	high		0.2291	0.4606	0.2892	0.3358	0.199	0.921418	high		0.1016	0.3545	0.9041	0.4799	0.8436	0.6674	1.67529	high		0.5158	0.6848	0.1527	0.9216	0.8452	0.641659	low		0.927	0.912	0.0871	0.3693	0.1537	0.1647	0.882252	high		0.0471	0.4076	0.2498	0.6273
	TCGA-B8-5159	1.97808	0	0.8889	0.6169	0.1153	0.7798	0.8796	0.433517	low		0.1055	0.6559	0.1019	0.1023	0.0965	0.217893	low		0.104	0.1586	0.9624	0.2293	0.9316	0.7631	0.625934	low		0.6169	0.7191	0.0389	0.8971	0.6487	0.507906	low		0.8889	0.9321	0.0704	0.1153	0.2775	0.1463	0.397903	low		0.1128	0.1903	0.1856	0.8796
	TCGA-B8-5162	0.0986301	0	0.7604	0.3085	0.2912	0.9212	0.1036	3.00388	high		0.3724	0.2263	0.1006	0.6166	0.1113	1.21471	high		0.1079	0.1754	0.9363	0.2345	0.9039	0.5251	0.583937	low		0.3085	0.2814	0.1229	0.691	0.8327	1.95771	high		0.7604	0.8824	0.0417	0.2912	0.2513	0.159	0.71017	low		0.145	0.2178	0.1215	0.1036
	TCGA-B8-5163	2.25205	0	0.8639	0.4107	0.2812	0.8171	0.4733	1.44361	high		0.2503	0.1648	0.1587	0.527	0.1375	1.29913	high		0.123	0.1969	0.9573	0.5881	0.9156	0.7117	0.926138	high		0.4107	0.425	0.1107	0.7878	0.5241	1.66413	high		0.8639	0.879	0.0708	0.2812	0.3222	0.2107	0.615803	low		0.0543	0.2595	0.2933	0.4733
	TCGA-B8-5164	0.0712329	0	0.9068	0.6693	0.1344	0.887	0.9019	0.324684	low		0.2391	0.4529	0.1777	0.078	0.0629	0.37923	low		0.1011	0.1733	0.9715	0.2988	0.94362	0.5929	0.494515	low		0.6693	0.6704	0.1152	0.7563	0.8703	0.501483	low		0.9068	0.9353	0.0435	0.1344	0.2797	0.2114	0.463352	low		0.0769	0.0936	0.1268	0.9019
	TCGA-B8-5165	2.01918	0	0.8762	0.678	0.265	0.9663	0.8776	0.369717	low		0.136	0.4819	0.086	0.3602	0.1352	0.448806	low		0.0606	0.1794	0.9388	0.1137	0.9448	0.4579	0.372661	low		0.678	0.4457	0.0377	0.8124	0.9353	0.490809	low		0.8762	0.9073	0.0553	0.265	0.2833	0.1701	0.528128	low		0.0619	0.0782	0.1347	0.8776
	TCGA-B8-5545	4.17808	0	0.9157	0.6167	0.2525	0.8886	0.6137	0.645577	low		0.2122	0.4063	0.1896	0.526	0.0635	0.775064	low		0.1486	0.1346	0.9707	0.3133	0.9483	0.6197	0.511913	low		0.6167	0.4716	0.0834	0.6184	0.8627	0.77625	low		0.9157	0.9277	0.0921	0.2525	0.2771	0.1197	0.433731	low		0.0328	0.1705	0.0911	0.6137
	TCGA-B8-5546	1.38356	0	0.8918	0.5779	0.2117	0.8568	0.287	1.15642	high		0.2862	0.6256	0.3427	0.0447	0.0492	0.413315	low		0.104	0.0781	0.9768	0.3692	0.9252	0.601	0.483145	low		0.5779	0.8717	0.0063	0.6679	0.6427	0.53903	low		0.8918	0.9462	0.0946	0.2117	0.2219	0.0881	0.4425	low		0.0588	0.1403	0.18467	0.287
	TCGA-B8-5549	0.531507	0	0.8816	0.7905	0.1965	0.9918	0.8436	0.274174	low		0.143	0.5223	0.1367	0.2263	0.0388	0.327624	low		0.0862	0.1402	0.9525	0.1525	0.94052	0.4726	0.373309	low		0.7905	0.6577	0.0335	0.7473	0.9822	0.298656	low		0.8816	0.8805	0.152	0.1965	0.4006	0.1588	0.417207	low		0.0488	0.1216	0.1023	0.8436
	TCGA-B8-5550	4.04384	0	0.9135	0.4032	0.1222	0.7082	0.7443	0.85448	high		0.2124	0.3572	0.2857	0.3023	0.0933	0.830618	low		0.0396	0.0616	0.9693	0.4412	0.9196	0.5617	0.446965	low		0.4032	0.384	0.0376	0.8514	0.5135	1.46458	high		0.9135	0.9275	0.058	0.1222	0.2397	0.1811	0.486934	low		0.09	0.1034	0.139	0.7443
	TCGA-B8-5551	0.0438356	0	0.6938	0.3416	0.3202	0.3976	0.4079	4.55927	high		0.2733	0.1397	0.1589	0.2889	0.1948	1.11073	high		0.0998	0.2184	0.8951	0.7082	0.9072	0.6521	1.17208	high		0.3416	0.2307	0.3671	0.6946	0.2933	5.76831	high		0.6938	0.9271	0.1468	0.3202	0.191	0.2674	1.66157	high		0.0641	0.2658	0.19921	0.4079
	TCGA-B8-5552	2.86575	0	0.8569	0.8637	0.2849	0.8942	0.7078	0.402312	low		0.2404	0.3813	0.1672	0.3081	0.1638	0.704704	low		0.0997	0.1784	0.9517	0.1829	0.93647	0.4853	0.433019	low		0.8637	0.4307	0.057	0.6739	0.6584	0.549854	low		0.8569	0.8956	0.0596	0.2849	0.2948	0.1492	0.515902	low		0.0728	0.233	0.1856	0.7078
	TCGA-B8-5553	1.19178	0	0.8951	0.7299	0.18	0.9424	0.7724	0.35241	low		0.1593	0.5539	0.115	0.2161	0.0559	0.304263	low		0.028	0.1776	0.9819	0.1374	0.9237	0.6264	0.437719	low		0.7299	0.7196	0.1205	0.7763	0.8321	0.429775	low		0.8951	0.9022	0.0272	0.18	0.299	0.1557	0.398375	low		0.0337	0.195	0.1115	0.7724
	TCGA-B8-A54D	2.27397	0	0.7734	0.5708	0.5533	0.84451	0.8705	0.954666	high		0.6363	0.5239	0.4235	0.42997	0.3041	2.339	high		0.4011	0.5739	0.9414	0.8095	0.938014	0.8842	3.8398	high		0.5708	0.4611	0.1399	0.5167	0.61448	1.41545	high		0.7734	0.8509	0.0987	0.5533	0.1942	0.4064	3.36236	high		0.2939	0.221	0.818	0.8705
	TCGA-B8-A54E	2.49041	0	0.9164	0.8352	0.2269	0.1077	0.9239	0.871071	high		0.6289	0.2996	0.5599	0.0501	0.086	1.82473	high		0.0798	0.1888	0.982	0.8559	0.9165	0.8923	1.23262	high		0.8352	0.67	0.0422	0.298	0.0396	1.22473	high		0.9164	0.8129	0.0331	0.2269	0.0566	0.0533	0.780781	low		0.2498	0.0642	0.2668	0.9239
	TCGA-B8-A54F	1.42192	0	0.7351	0.5065	0.4456	0.953	0.4188	1.61051	high		0.3299	0.5056	0.1807	0.4577	0.1185	0.720292	low		0.0843	0.4031	0.8046	0.9289	0.9619	0.9079	2.6311	high		0.5065	0.4696	0.0937	0.675	0.9437	0.864846	high		0.7351	0.85	0.0662	0.4456	0.3424	0.2139	0.90649	high		0.1185	0.1675	0.2081	0.4188
	TCGA-B8-A54G	0.145205	0	0.7442	0.3689	0.462	0.8002	0.5788	2.07902	high		0.6169	0.4879	0.1882	0.2134	0.2775	0.950605	high		0.1297	0.3165	0.867	0.638	0.9709	0.7335	1.23393	high		0.3689	0.431	0.2799	0.7064	0.6236	2.43644	high		0.7442	0.8795	0.1345	0.462	0.2626	0.1839	1.15973	high		0.1356	0.2993	0.7763	0.5788
	TCGA-B8-A54H	0.70137	0	0.8379	0.6371	0.3154	0.8769	0.7888	0.591148	low		0.4256	0.5132	0.2431	0.3434	0.1244	0.7801	low		0.1265	0.2579	0.9223	0.2284	0.940411	0.5745	0.645654	low		0.6371	0.4552	0.0326	0.7988	0.8622	0.576072	low		0.8379	0.8852	0.0727	0.3154	0.2836	0.1927	0.702554	low		0.0645	0.1099	0.256	0.7888
	TCGA-B8-A54I	0.410959	0	0.7436	0.274	0.6224	0.7829	0.3542	4.49711	high		0.5933	0.3344	0.3582	0.689	0.2256	3.25145	high		0.1181	0.187	0.9141	0.6762	0.841	1	2.28852	high		0.274	0.3811	0.2568	0.6236	0.8285	2.6005	high		0.7436	0.8304	0.1442	0.6224	0.224	0.1978	1.91095	high		0.1044	0.1644	0.5965	0.3542
	TCGA-B8-A54J	1.44658	0	0.8054	0.4908	0.3721	0.9394	0.8184	0.759099	low		0.4392	0.4705	0.2312	0.3299	0.1105	0.786944	low		0.0943	0.2316	0.9235	0.3128	0.9401	0.4618	0.537761	low		0.4908	0.4379	0.0546	0.8058	0.7204	0.97501	high		0.8054	0.878	0.0865	0.3721	0.2883	0.128	0.64662	low		0.0949	0.158	0.1828	0.8184
	TCGA-B8-A54K	1.28493	0	0.7616	0.4892	0.2029	0.9697	0.5965	0.839899	low		0.3718	0.7996	0.2125	0.2554	0.0934	0.35136	low		0.1126	0.2243	0.9317	0.3527	0.9694	0.6281	0.597133	low		0.4892	0.4627	0	0.8221	1	0.611325	low		0.7616	0.8908	0.0984	0.2029	0.3002	0.1967	0.693242	low		0.0769	0.1675	0.2746	0.5965
	TCGA-B8-A7U6	1.35616	0	0.7835	0.7536	0.5772	0.9276	0.835	0.650269	low		0.5191	0.4625	0.1617	0.6465	0.1069	1.11486	high		0.087	0.2974	0.9473	0.4928	0.9257	0.7728	1.03031	high		0.7536	0.3242	0.0531	0.7383	0.914	0.552144	low		0.7835	0.8444	0.0835	0.5772	0.218	0.1412	1.20362	high		0.1147	0.1563	0.2265	0.835
	TCGA-B8-A8YJ	1.18082	0	0.7307	0.3691	0.3584	0.9181	0.2888	2.34755	high		0.3835	0.1106	0.2292	0.6128	0.2369	2.62859	high		0.1369	0.3046	0.9373	0.6207	0.9061	0.7064	1.28625	high		0.3691	0.2438	0.0651	0.713	0.7363	1.75796	high		0.7307	0.8238	0.0541	0.3584	0.1745	0.1997	1.40488	high		0.1775	0.322	0.1869	0.2888
	TCGA-BP-4158	9.25205	0	0.6306	0.5733	0.3453	0.9217	0.8536	0.771551	low		0.398	0.6003	0.097	0.3596	0.1483	0.48848	low		0.113	0.2767	0.976	0.1845	0.9604	0.474	0.429442	low		0.5733	0.2275	0.0135	0.628	0.8945	0.957663	high		0.6306	0.8878	0.069	0.3453	0.2745	0.2189	1.10618	high		0.1794	0.2407	0.212	0.8536
	TCGA-BP-4159	7.12603	1	0.8164	0.364	0.4281	0.9325	0.4695	1.74566	high		0.786	0.4236	0.2091	0.4723	0.2083	1.62956	high		0.0433	0.2363	0.9558	0.5444	0.8659	0.8665	1.3203	high		0.364	0.2658	0.0121	0.8048	0.6817	1.51488	high		0.8164	0.8203	0.0554	0.4281	0.2464	0.0699	0.674901	low		0.145	0.1705	0.1856	0.4695
	TCGA-BP-4160	7.89315	0	0.9111	0.6837	0.2199	0.8886	0.8384	0.391117	low		0.2329	0.5099	0.1692	0.2905	0.042	0.433067	low		0.0572	0.1628	0.9761	0.5142	0.934763	0.5536	0.52188	low		0.6837	0.4174	0.0651	0.8526	0.7199	0.650196	low		0.9111	0.8866	0.0191	0.2199	0.3158	0.0752	0.294851	low		0.1165	0.1336	0.1005	0.8384
	TCGA-BP-4161	7.52329	0	0.7836	0.5914	0.4587	0.8458	0.7706	0.9168	high		0.2811	0.4716	0.2783	0.4288	0.5188	1.97886	high		0.1608	0.2841	0.9353	0.6893	0.902	0.7191	1.41666	high		0.5914	0.4188	0.0787	0.6631	0.6711	1.02933	high		0.7836	0.8527	0.1013	0.4587	0.2576	0.2301	1.28804	high		0.1589	0.227	0.3009	0.7706
	TCGA-BP-4162	8.42192	0	0.7763	0.5703	0.3249	0.9088	0.823	0.663624	low		0.2126	0.4763	0.1812	0.3554	0.2279	0.734579	low		0.1093	0.2543	0.9745	0.456	0.9429	0.5395	0.601499	low		0.5703	0.5148	0.0335	0.7917	0.8371	0.639224	low		0.7763	0.865	0.0178	0.3249	0.2459	0.2121	0.874905	high		0.0675	0.2447	0.3456	0.823
	TCGA-BP-4163	7.77808	0	0.8213	0.5847	0.3771	0.9178	0.5551	0.970543	high		0.1821	0.5133	0.2557	0.2374	0.2908	0.776032	low		0.0661	0.4321	0.8977	0.3615	0.9189	0.7377	1.29671	high		0.5847	0.5221	0.0582	0.7327	0.9138	0.626717	low		0.8213	0.9164	0.0975	0.3771	0.2243	0.1821	0.891568	high		0.1544	0.3275	0.2792	0.5551
	TCGA-BP-4164	2.71781	1	0.7934	0.49	0.3993	0.9178	0.88	0.757184	low		0.4618	0.7132	0.2017	0.4617	0.2749	0.821721	low		0.148	0.3322	0.9103	0.3234	0.9747	0.7734	0.935811	high		0.49	0.6647	0.0488	0.749	0.8999	0.629452	low		0.7934	0.869	0.0811	0.3993	0.2137	0.1998	1.13047	high		0.216	0.1107	0.3997	0.88
	TCGA-BP-4165	8.32055	0	0.6607	0.3001	0.5038	0.8602	0.9096	1.54892	high		0.4677	0.6136	0.1709	0.5627	0.1424	0.80331	low		0.1157	0.2419	0.9649	0.5208	0.9287	0.7518	0.911119	low		0.3001	0.2594	0	0.4399	0.4907	3.02117	high		0.6607	0.852	0.0766	0.5038	0.3774	0.1195	0.704337	low		0.248	0.183	0.2604	0.9096
	TCGA-BP-4166	0.0356164	0	0.7745	0.4119	0.2306	0.9773	0.7998	0.719856	low		0.202	0.4143	0.1658	0.4942	0.1179	0.760423	low		0.047	0.1904	0.9848	0.3803	0.938	0.5051	0.437711	low		0.4119	0.225	0.0399	0.7462	0.8709	1.30097	high		0.7745	0.9286	0.0637	0.2306	0.2303	0.097	0.525978	low		0.09	0.2586	0.0571	0.7998
	TCGA-BP-4167	7.44658	0	0.7377	0.4096	0.6029	0.77485	0.60979	2.37434	high		0.715	0.1545	0.2415	0.6291	0.23522	3.44839	high		0.1119	0.3369	0.8889	0.6826	0.9025	0.7758	1.76235	high		0.4096	0.1781	0.2455	0.6297	0.5102	3.49952	high		0.7377	0.8583	0.1206	0.6029	0.2187	0.1379	1.37876	high		0.07809	0.2552	0.38169	0.60979
	TCGA-BP-4169	1.92055	1	0.607	0.5727	0.373	0.9127	0.5091	1.41297	high		0.2721	0.2333	0.361	0.7023	0.2037	2.84881	high		0.1747	0.3067	0.7731	0.71	0.8592	0.8677	3.67059	high		0.5727	0.2699	0.1718	0.6636	0.8505	1.2621	high		0.607	0.8142	0.1319	0.373	0.2323	0.2303	1.9297	high		0.1582	0.5407	0.1518	0.5091
	TCGA-BP-4170	6.41918	1	0.8646	0.4845	0.3053	0.9783	0.754	0.668517	low		0.2007	0.5075	0.151	0.5296	0.0699	0.596708	low		0.0762	0.1522	0.9733	0.2066	0.9587	0.5357	0.367047	low		0.4845	0.5502	0.1219	0.8732	0.9637	0.698496	low		0.8646	0.8295	0.0756	0.3053	0.2746	0.1291	0.626728	low		0.1123	0.1993	0.0832	0.754
	TCGA-BP-4173	5.1863	0	0.6212	0.4844	0.3643	0.8237	0.4585	1.98826	high		0.4359	0.3032	0.2233	0.3915	0.1389	1.1801	high		0.1077	0.243	0.9138	0.708	0.9679	0.7582	1.01246	high		0.4844	0.3781	0.1973	0.5656	0.7665	1.69165	high		0.6212	0.8301	0.1187	0.3643	0.2281	0.238	1.8241	high		0.1367	0.4539	0.3675	0.4585
	TCGA-BP-4174	5.14795	0	0.8857	0.4679	0.2407	0.6281	0.7546	1.04374	high		0.3523	0.4291	0.3838	0.2541	0.1098	1.02732	high		0.0483	0.1608	0.9483	0.3258	0.9272	0.7817	0.676169	low		0.4679	0.6161	0.0435	0.7157	0.4813	1.14885	high		0.8857	0.9089	0.0345	0.2407	0.267	0.2012	0.56707	low		0.1512	0.2457	0.1949	0.7546
	TCGA-BP-4176	5.35616	0	0.6573	0.3934	0.284	0.8849	0.6971	1.26371	high		0.4517	0.6073	0.1956	0.2434	0.1779	0.583655	low		0.0979	0.2367	1	0.7147	0.8756	0.5812	0.941366	high		0.3934	0.5328	0.0422	0.7781	0.7741	1.00433	high		0.6573	0.8856	0.135	0.284	0.2483	0.2605	1.45631	high		0.1607	0.298	0.0925	0.6971
	TCGA-BP-4177	4.57534	0	0.8748	0.7428	0.2335	0.9923	0.4856	0.545265	low		0.2584	0.8025	0.1093	0.229	0.0397	0.211524	low		0.0205	0.1631	0.9735	0.0425	0.9487	0.6707	0.379096	low		0.7428	0.6023	0.0528	0.7666	0.984	0.359755	low		0.8748	0.9055	0.0207	0.2335	0.2414	0.1017	0.426459	low		0.0182	0.3563	0.139	0.4856
	TCGA-BP-4325	8.12055	0	0.6931	0.6834	0.2463	0.9178	0.8843	0.48383	low		0.3503	0.7361	0.2287	0.4911	0.2807	0.806728	low		0.1271	0.3784	0.8859	0.6555	0.9203	0.6264	1.44409	high		0.6834	0.4695	0.0276	0.7155	0.906	0.524769	low		0.6931	0.8393	0.0719	0.2463	0.3075	0.1646	0.746437	low		0.2119	0.1067	0.3526	0.8843
	TCGA-BP-4326	4.45205	1	0.4996	0.3674	0.4998	0.9323	0.6444	2.24941	high		0.3678	0.3105	0.3981	0.6654	0.2288	2.97846	high		0.1936	0.2871	0.8904	0.7258	0.9665	0.7041	1.2708	high		0.3674	0.3285	0.2693	0.6048	0.876	2.25555	high		0.4996	0.7728	0.287	0.4998	0.2502	0.2476	4.10297	high		0.0878	0.4416	0.212	0.6444
	TCGA-BP-4327	0.29863	1	0.5971	0.5283	0.5246	0.7918	0.8145	1.47208	high		0.567	0.769	0.3263	0.4144	0.217	0.934965	high		0.2257	0.3431	0.6621	0.6995	0.9391	0.7263	3.30418	high		0.5283	0.3884	0.0601	0.4147	0.7984	1.29834	high		0.5971	0.8467	0.1305	0.5246	0.2605	0.1564	1.51735	high		0.1919	0.2044	0.3795	0.8145
	TCGA-BP-4329	2.31507	1	0.7613	0.6358	0.2745	0.8801	0.6337	0.776141	low		0.4032	0.4991	0.2057	0.4862	0.0447	0.744311	low		0.0485	0.1742	0.861	0.2634	0.9598	0.754	0.704568	low		0.6358	0.2862	0.046	0.6191	0.8852	0.848622	high		0.7613	0.8179	0.1832	0.2745	0.3018	0.1182	0.811132	low		0.2742	0.3653	0.2167	0.6337
	TCGA-BP-4330	5.1726	0	0.7525	0.5605	0.3811	0.9308	0.8276	0.726439	low		0.3238	0.5994	0.1785	0.5174	0.1659	0.725193	low		0.084	0.2528	0.9466	0.5741	0.971	0.5304	0.592538	low		0.5605	0.4481	0.0482	0.6289	0.8985	0.797707	low		0.7525	0.8651	0.0736	0.3811	0.2935	0.2208	0.96777	high		0.1308	0.1927	0.3543	0.8276
	TCGA-BP-4331	6.72329	1	0.8283	0.5831	0.601	0.9058	0.6929	1.10694	high		0.2801	0.5915	0.2227	0.2737	0.2941	0.722989	low		0.1381	0.3846	0.877	0.4164	0.8518	0.6731	1.86776	high		0.5831	0.4437	0.065	0.7258	0.873	0.740287	low		0.8283	0.9381	0.0355	0.601	0.241	0.2383	1.09822	high		0.0902	0.2009	0.3637	0.6929
	TCGA-BP-4332	3.10411	0	0.7748	0.64	0.3835	0.8528	0.6897	0.850387	high		0.3988	0.6765	0.2672	0.4694	0.3578	1.16024	high		0.1665	0.2724	0.8993	0.3459	0.9466	0.8714	1.18776	high		0.64	0.2395	0.0042	0.4459	0.6314	1.29438	high		0.7748	0.9111	0.028	0.3835	0.2746	0.2635	0.944614	high		0.1652	0.1616	0.3113	0.6897
	TCGA-BP-4335	1.30137	1	0.4693	0.3328	0.3593	0.6458	0.7946	2.51605	high		0.8046	0.5488	0.2771	0.369	0.4258	2.11128	high		0.1101	0.3616	0.7367	0.9047	0.925775	0.8538	3.37401	high		0.3328	0.1017	0.1326	0.2843	0.5623	4.7785	high		0.4693	0.7722	0.1457	0.3593	0.1944	0.1963	2.65918	high		0.2662	0.2576	0.6221	0.7946
	TCGA-BP-4337	0.00547945	1	0.6452	0.3733	0.6254	0.7716	0.6759	2.69357	high		0.5389	0.5277	0.3137	0.7919	0.3145	2.74624	high		0.206	0.3835	0.7808	0.6635	0.8793	0.7585	3.26537	high		0.3733	0.1264	0.1277	0.238	0.6427	4.02674	high		0.6452	0.7588	0.1101	0.6254	0.2517	0.2238	2.42909	high		0.2667	0.2509	0.4554	0.6759
	TCGA-BP-4338	7.83288	0	0.8361	0.1458	0.1693	0.7374	0.7325	1.57279	high		0.1308	0.2839	0.215	0.2649	0.0699	0.66434	low		0.0725	0.1076	0.9874	0.661	0.8408	0.7317	1.03876	high		0.1458	0.55	0.1113	0.945	0.4066	2.44279	high		0.8361	0.9617	0.0866	0.1693	0.3111	0.1435	0.394125	low		0.0525	0.1336	0.21373	0.7325
	TCGA-BP-4340	1.53973	1	0.7226	0.5791	0.3093	0.9169	0.9467	0.561832	low		0.37	0.5939	0.2412	0.2917	0.2438	0.758562	low		0.1608	0.2321	0.8462	0.4446	0.9311	0.8336	1.41636	high		0.5791	0.5331	0.0141	0.567	0.9035	0.681953	low		0.7226	0.8753	0.1653	0.3093	0.3759	0.2068	0.810117	low		0.1517	0.0994	0.3151	0.9467
	TCGA-BP-4341	4.35342	1	0.4655	0.5305	0.5552	0.7243	0.8897	1.80685	high		0.6279	0.5976	0.2088	0.5627	0.1878	1.14562	high		0.1795	0.3641	0.9517	0.5995	0.9067	0.9211	1.90492	high		0.5305	0.1982	0.0369	0.4669	0.6094	1.8377	high		0.4655	0.7245	0.0835	0.5552	0.2218	0.2226	3.2771	high		0.1983	0.0879	0.3958	0.8897
	TCGA-BP-4342	6.18082	1	0.6159	0.2722	0.5411	0.8398	0.776	2.3028	high		0.4387	0.5823	0.154	0.5823	0.2076	0.925763	high		0.184	0.2493	0.8395	0.7424	0.9395	0.6957	1.54981	high		0.2722	0.2649	0.0595	0.6203	0.7766	2.17258	high		0.6159	0.8368	0.1013	0.5411	0.174	0.2997	3.18685	high		0.1016	0.4396	0.492	0.776
	TCGA-BP-4343	5.23836	1	0.9286	0.3001	0.3036	0.9273	0.581	1.20119	high		0.2627	0.2672	0.2181	0.7782	0.2312	2.19153	high		0.1255	0.2136	0.9636	0.0907	0.8718	0.7009	0.779183	low		0.3001	0.1882	0.2491	0.554	0.878	3.1143	high		0.9286	0.8797	0.0359	0.3036	0.2371	0.1139	0.496662	low		0.0471	0.229	0.0747	0.581
	TCGA-BP-4344	4.56438	0	0.7038	0.7834	0.2576	0.9017	0.3991	0.860933	high		0.298	0.4279	0.1173	0.5007	0.2695	0.977146	high		0.0698	0.275	0.871	0.3732	0.9383	0.7603	1.02119	high		0.7834	0.3214	0.045	0.5683	0.8336	0.661961	low		0.7038	0.9053	0.0569	0.2576	0.2255	0.2019	0.924807	high		0.1258	0.2235	0.1449	0.3991
	TCGA-BP-4345	4.15342	0	0.4911	0.3476	0.34	0.9229	0.4572	2.51116	high		0.4723	0.1023	0.4937	0.6247	0.239	5.70673	high		0.1091	0.2025	0.9302	0.6869	0.9354	0.8738	1.20649	high		0.3476	0.1034	0.0468	0.4934	0.6922	2.74815	high		0.4911	0.8077	0.1386	0.34	0.2368	0.1428	1.64224	high		0.2461	0.4005	0.0771	0.4572
	TCGA-BP-4346	4.09041	1	0.7245	0.626	0.5313	0.8977	0.7865	0.933005	high		0.3867	0.5444	0.3208	0.3449	0.1914	0.992728	high		0.1209	0.4418	0.9836	0.37	0.9705	0.474	0.620416	low		0.626	0.4111	0.1607	0.5924	0.8627	0.979947	high		0.7245	0.877	0.1335	0.5313	0.2321	0.2241	1.6578	high		0.1678	0.2512	0.727	0.7865
	TCGA-BP-4347	3.74521	0	0.7196	0.6817	0.3863	0.9644	0.8793	0.539191	low		0.2462	0.4768	0.2933	0.3525	0.2912	1.12988	high		0.1097	0.2746	0.9295	0.2915	0.9401	0.5973	0.686414	low		0.6817	0.3787	0.0189	0.6825	0.9161	0.591352	low		0.7196	0.8977	0.0723	0.3863	0.259	0.2011	0.98824	high		0.1393	0.2711	0.1552	0.8793
	TCGA-BP-4349	1.01918	0	0.522	0.3792	0.439	0.6448	0.754	2.58071	high		0.3599	0.4831	0.3643	0.3984	0.3424	1.74388	high		0.1642	0.339	0.8673	0.7901	0.93654	0.6838	1.67276	high		0.3792	0.2713	0.0812	0.452	0.312	3.57748	high		0.522	0.7566	0.0877	0.439	0.2367	0.1383	1.73909	high		0.28	0.2357	0.2211	0.754
	TCGA-BP-4351	2.65753	0	0.4271	0.3344	0.5084	0.5447	0.7835	3.91673	high		0.6368	0.3705	0.4122	0.6789	0.2951	4.11578	high		0.1753	0.3019	0.8092	0.9832	0.9228	1	3.56302	high		0.3344	0.1564	0.161	0.3358	0.4998	4.80441	high		0.4271	0.7279	0.1289	0.5084	0.2227	0.2064	3.39689	high		0.3961	0.4037	0.6397	0.7835
	TCGA-BP-4352	0.942466	1	0.0821	0.3376	0.6537	0.19	0.4208	22.6027	high		0.8111	0.2439	0.4152	0.7023	0.4216	7.98205	high		0.2775	0.4957	0.8789	0.9386	0.8983	0.9709	4.96479	high		0.3376	0.0217	0.5051	0.2713	0.2367	15.9294	high		0.0821	0.8781	0.2975	0.6537	0.2006	0.2963	10.3286	high		0.6128	0.5286	1	0.4208
	TCGA-BP-4353	1.0274	1	0.8092	0.6356	0.2915	0.8747	0.4856	0.941559	high		0.3952	0.4225	0.1835	0.3525	0.3448	1.19668	high		0.1619	0.3368	0.859	0.6026	0.8419	0.7785	2.61528	high		0.6356	0.2513	0.0932	0.5708	0.7665	1.1662	high		0.8092	0.8854	0.1629	0.2915	0.2464	0.1862	0.963181	high		0.1401	0.4781	0.176	0.4856
	TCGA-BP-4354	2.83288	1	0.1742	0.4342	0.3986	0.8645	0.1079	6.57367	high		0.4165	0.1218	0.3427	0.48	0.3202	3.4526	high		0.1859	0.3718	0.8963	0.8296	0.7748	0.7703	4.17498	high		0.4342	0.1538	0.4698	0.7421	0.7794	3.52333	high		0.1742	0.8266	0.0548	0.3986	0.1754	0.313	5.02581	high		0.0857	0.3941	0.5755	0.1079
	TCGA-BP-4355	2.61096	1	0.4924	0.5453	0.5485	0.7613	0.7218	2.04487	high		0.5065	0.5338	0.2565	0.6224	0.206	1.45541	high		0.1746	0.3279	0.7946	0.6389	0.926975	0.7862	2.20513	high		0.5453	0.1849	0.1044	0.4541	0.2782	3.04548	high		0.4924	0.8904	0.0652	0.5485	0.2655	0.1733	1.49014	high		0.3389	0.4205	0.2489	0.7218
	TCGA-BP-4756	1.02466	0	0.736	0.3476	0.3656	0.6898	0.8902	1.40723	high		0.2319	0.7839	0.3607	0.0183	0.1703	0.385162	low		0.1523	0.2323	0.895	0.4041	0.9523	0.7041	0.894839	low		0.3476	0.6381	0.0013	0.4615	0.4673	1.72524	high		0.736	0.9548	0.068	0.3656	0.288	0.167	0.658624	low		0.0782	0.1488	0.6221	0.8902
	TCGA-BP-4758	6.04932	0	0.741	0.4287	0.454	0.8188	0.7864	1.31654	high		0.618	0.5412	0.1179	0.4739	0.2379	0.971219	high		0.1028	0.2226	1	0.2976	0.9651	0.7782	0.573035	low		0.4287	0.2855	0.0074	0.5675	0.8726	1.2985	high		0.741	0.8687	0.0355	0.454	0.3034	0.1017	0.61901	low		0.1556	0.1126	0.2167	0.7864
	TCGA-BP-4759	6.49863	0	0.7874	0.4748	0.3202	0.9943	0.7372	0.770417	low		0.2777	0.5295	0.0575	0.4809	0.1343	0.517135	low		0.045	0.1577	0.98	0.273	0.8814	0.4838	0.489609	low		0.4748	0.4748	0.0255	0.6415	0.977	0.799038	low		0.7874	0.894	0.0916	0.3202	0.2946	0.116	0.57205	low		0.0619	0.219	0.1441	0.7372
	TCGA-BP-4760	6.46849	0	0.9242	0.6079	0.1089	0.9654	0.4976	0.556655	low		0.2405	0.7385	0.2838	0.4075	0.1219	0.542777	low		0.0187	0.1133	0.9871	0.0745	0.9365	0.73	0.391578	low		0.6079	0.5908	0.0171	0.7898	0.9113	0.479522	low		0.9242	0.9003	0.0973	0.1089	0.266	0.1213	0.40663	low		0.0512	0.5363	0.113	0.4976
	TCGA-BP-4761	0.49863	0	0.7682	0.45725	0.8549	0.7821	0.5059	3.49451	high		0.9344	0.6096	0.2543	0.8278	0.0859	1.95996	high		0.0433	0.2073	0.8889	0.4989	0.764	0.9233	2.57696	high		0.45725	0.1111	0.2166	0.3969	0.743	3.13343	high		0.7682	0.8811	0.1656	0.8549	0.1713	0.2186	2.89265	high		0.1061	0.106	1	0.5059
	TCGA-BP-4762	3.67945	1	0.871	0.7211	0.2304	0.9548	0.6452	0.47272	low		0.2655	0.3759	0.0864	0.4079	0.1168	0.622915	low		0.0384	0.1121	1	0.0535	0.9118	0.4707	0.30416	low		0.7211	0.3587	0.0451	0.8106	0.8999	0.528067	low		0.871	0.8754	0.0699	0.2304	0.281	0.0993	0.445046	low		0.0498	0.2097	0.0832	0.6452
	TCGA-BP-4763	3.47945	1	0.8835	0.611	0.409	0.912	0.3962	1.14458	high		0.3133	0.3809	0.2415	0.4911	0.2527	1.39691	high		0.0468	0.1539	0.9411	0.2375	0.8015	0.6765	1.00265	high		0.611	0.3443	0.0067	0.6813	0.8726	0.735143	low		0.8835	0.9109	0	0.409	0.1868	0.0874	0.554465	low		0.0133	0.4551	0.4089	0.3962
	TCGA-BP-4765	5.98356	0	0.8006	0.8232	0.2984	0.9229	0.8957	0.342968	low		0.3216	0.5167	0.174	0.3832	0.2042	0.736437	low		0.1297	0.2467	0.8967	0.2725	0.9397	0.6639	0.801782	low		0.8232	0.3794	0.0391	0.5871	0.851	0.539189	low		0.8006	0.8827	0.0378	0.2984	0.2857	0.1578	0.594168	low		0.2087	0.1824	0.3441	0.8957
	TCGA-BP-4766	4.00548	0	0.8705	0.5935	0.2832	0.9073	0.8523	0.507109	low		0.1298	0.3805	0.2412	0.2886	0.2214	0.838836	low		0.0651	0.3272	0.9257	0.2257	0.9299	0.5473	0.66182	low		0.5935	0.4601	0.0127	0.8004	0.794	0.65082	low		0.8705	0.9032	0.0563	0.2832	0.2849	0.1656	0.538932	low		0.1802	0.096	0.3131	0.8523
	TCGA-BP-4768	1.09589	0	0.5558	0.4589	0.3129	0.9738	0.7697	1.04656	high		0.351	0.6759	0.1376	0.2848	0.2312	0.483555	low		0.0471	0.3997	0.9248	0.2812	0.8886	0.7467	1.20769	high		0.4589	0.5415	0.0117	0.7494	0.9816	0.662997	low		0.5558	0.9242	0.1339	0.3129	0.2759	0.2146	1.24218	high		0.0679	0.4456	0.404	0.7697
	TCGA-BP-4769	5.13973	0	0.812	0.3062	0.2358	0.9516	0.4369	1.50184	high		0.3271	0.6177	0.3608	0.6642	0.2527	1.62223	high		0.0463	0.2717	0.9312	0.0917	0.9711	0.6204	0.47061	low		0.3062	0.3314	0.0084	0.723	0.8852	1.34777	high		0.812	0.9017	0.0889	0.2358	0.2558	0.1307	0.583731	low		0.0471	0.3723	0.3526	0.4369
	TCGA-BP-4770	0.90137	1	0.2866	0.2449	0.5676	0.8271	0.0709	11.4459	high		0.6812	0.0036	0.3027	0.7309	0.2161	5.60036	high		0.0935	0.1101	1	0.6337	0.6966	0.9202	2.58339	high		0.2449	0.0078	0.4451	0.1336	0.6817	12.1053	high		0.2866	0.6525	0.3909	0.5676	0.1898	0.1802	9.74692	high		0.1425	0.5766	0.0883	0.0709
	TCGA-BP-4771	0.443836	1	0.4153	0.4618	0.4672	0.846	0.466	3.01771	high		0.6459	0.3075	0.4098	0.5352	0.2845	3.67583	high		0.1953	0.3925	0.8428	0.6505	0.9085	0.927	2.93262	high		0.4618	0.3387	0.2077	0.4821	0.8126	1.95787	high		0.4153	0.8745	0.1558	0.4672	0.2181	0.2528	2.99381	high		0.1695	0.3141	0.318	0.466
	TCGA-BP-4774	5.16438	0	0.7015	0.5163	0.468	0.9381	0.8413	0.925676	high		0.2669	0.5906	0.1371	0.6166	0.5167	1.45273	high		0.0854	0.2216	0.8681	0.5588	0.9417	0.7518	1.07928	high		0.5163	0.3002	0.0251	0.6374	0.8553	1.0459	high		0.7015	0.892	0.0484	0.468	0.2233	0.2106	1.24806	high		0.1292	0.1407	0.3262	0.8413
	TCGA-BP-4775	5.04932	0	0.8142	0.5393	0.3506	0.9322	0.9334	0.566361	low		0.191	0.5705	0.1981	0.1601	0.332	0.598169	low		0.0942	0.1641	0.9352	0.2859	0.928878	0.5648	0.547869	low		0.5393	0.4747	0.0168	0.8638	0.9048	0.59905	low		0.8142	0.8901	0.0274	0.3506	0.3065	0.1938	0.631106	low		0.1133	0.1568	0.3795	0.9334
	TCGA-BP-4776	1.12603	0	0.624	0.6331	0.5646	0.889	0.7918	1.11004	high		0.8203	0.4728	0.1709	0.4379	0.2446	1.43801	high		0.1282	0.1895	0.7683	0.5095	0.9365	1	2.00848	high		0.6331	0.1264	0.1423	0.3851	0.9206	1.51778	high		0.624	0.8158	0.094	0.5646	0.1942	0.1303	1.71191	high		0.189	0.1563	0.3922	0.7918
	TCGA-BP-4777	4.74247	0	0.8448	0.7656	0.3131	0.8383	0.8108	0.474856	low		0.4711	0.5272	0.2884	0.3188	0.247	1.09412	high		0.1046	0.29	0.9352	0.5925	0.9256	0.601	0.93115	high		0.7656	0.3887	0.0789	0.6322	0.7199	0.722338	low		0.8448	0.8916	0.0743	0.3131	0.2909	0.1636	0.603763	low		0.1565	0.1891	0.4735	0.8108
	TCGA-BP-4781	5.69863	0	0.7772	0.4883	0.1483	0.9265	0.8421	0.561927	low		0.2764	0.5237	0.1475	0.1386	0.064	0.351595	low		0.0563	0.2096	1	0.1839	0.8485	0.5598	0.620325	low		0.4883	0.5171	0.043	0.7738	0.8916	0.738535	low		0.7772	0.8923	0.0696	0.1483	0.3268	0.1842	0.520237	low		0.056	0.2301	0.139	0.8421
	TCGA-BP-4782	0.969863	0	0.8599	0.6001	0.2417	0.8307	0.7329	0.64399	low		0.2097	0.4677	0.3049	0.4313	0.1547	0.974509	high		0.0771	0.1896	0.9588	0.2298	0.9315	0.7915	0.664896	low		0.6001	0.5572	0.0359	0.6179	0.6263	0.86052	high		0.8599	0.9081	0.0591	0.2417	0.2707	0.1835	0.57946	low		0.0702	0.1659	0.2251	0.7329
	TCGA-BP-4784	5.07945	0	0.9018	0.4803	0.1919	0.941	0.4989	0.845058	high		0.3449	0.6674	0.1025	0.559	0.085	0.491551	low		0.0425	0.1365	0.8455	0.0738	0.902	0.4773	0.539154	low		0.4803	0.397	0.0246	0.8093	0.904	0.800371	low		0.9018	0.8948	0.0917	0.1919	0.2758	0.1053	0.423999	low		0	0.4005	0.1199	0.4989
	TCGA-BP-4787	1.31507	1	0.8788	0.1627	0.3471	0.9212	0.5228	1.9318	high		0.3238	0.3647	0.4151	0.5894	0.3876	3.3539	high		0.0778	0.3449	0.9826	0.7687	0.6618	0.8543	4.75678	high		0.1627	0.5538	0.2082	0.8749	0.794	1.96318	high		0.8788	0.848	0.0877	0.3471	0.2367	0.2013	0.929039	high		0.1544	0.2375	0.4777	0.5228
	TCGA-BP-4789	4.07945	0	0.7961	0.5508	0.2017	0.9777	0.7225	0.585483	low		0.1614	0.4733	0.079	0.4599	0.2404	0.648512	low		0.1284	0.1914	0.9856	0.0704	0.9336	0.4639	0.37911	low		0.5508	0.2792	0.0054	0.7789	0.9366	0.762977	low		0.7961	0.9128	0.0462	0.2017	0.2648	0.1414	0.513193	low		0.0471	0.2006	0.1949	0.7225
	TCGA-BP-4790	3.04384	1	0.7484	0.5748	0.237	0.9808	0.7357	0.613253	low		0.2657	0.3854	0.2202	0.5072	0.5055	2.12588	high		0.2634	0.2348	0.9079	0.1337	0.93501	0.409	0.614268	low		0.5748	0.3014	0	0.6281	0.9606	0.787258	low		0.7484	0.9095	0.047	0.237	0.2775	0.253	0.827035	low		0.1749	0.1687	0.1949	0.7357
	TCGA-BP-4795	1.69863	0	0.8415	0.6153	0.3009	0.9623	0.5454	0.758025	low		0.3117	0.4903	0.2121	0.5599	0.1453	0.957568	high		0.0486	0.2076	0.9497	0.0738	0.9269	0.7703	0.59424	low		0.6153	0.3946	0.0945	0.6666	0.8893	0.810332	low		0.8415	0.8636	0.0646	0.3009	0.2603	0.1056	0.561449	low		0.0578	0.4353	0.108	0.5454
	TCGA-BP-4797	3.03288	0	0.8896	0.4076	0.1192	0.6907	0.748	0.889816	high		0.1534	0.566	0.287	0.3002	0.168	0.640203	low		0.0812	0.1658	0.9796	0.2293	0.9023	0.5757	0.520711	low		0.4076	0.547	0.0666	0.8057	0.4962	1.33923	high		0.8896	0.9008	0.0617	0.1192	0.2017	0.1576	0.561757	low		0	0.2247	0.139	0.748
	TCGA-BP-4798	0.915068	1	0.5477	0.1965	0.4557	0.7216	0.5287	4.43979	high		0.3862	0.1089	0.4431	0.8314	0.376	8.072	high		0.1405	0.4037	0.8162	0.7227	0.8067	0.8597	4.63869	high		0.1965	0.3468	0.199	0.5359	0.5949	4.04223	high		0.5477	0.846	0.1189	0.4557	0.2218	0.2775	2.56857	high		0.2404	0.3184	0.6932	0.5287
	TCGA-BP-4799	3.10411	1	0.7051	0.1395	0.4354	0.84698	0.557262	3.06731	high		0.5936	0.1021	0.2171	0.5335	0.21249	2.66108	high		0.3661	0.1762	0.9331	0.5485	0.9	1	2.14916	high		0.1395	0.0997	0.0168	0.2586	0.749683	4.75185	high		0.7051	0.8147	0.0817	0.4354	0.1238	0.0739	1.3105	high		0.2289	0.3912	0.3675	0.557262
	TCGA-BP-4801	3.07945	0	0.8858	0.664	0.2322	0.7369	0.8334	0.542839	low		0.2187	0.4939	0.0429	0.3638	0.0884	0.389413	low		0.0574	0.1755	1	0.1823	0.933	0.7032	0.474888	low		0.664	0.467	0.0373	0.7623	0.4952	0.849447	high		0.8858	0.8978	0.0283	0.2322	0.2755	0.1796	0.511428	low		0.0709	0.1034	0.1789	0.8334
	TCGA-BP-4803	0.558904	0	0.7758	0.4701	0.1763	0.9832	0.6125	0.784845	low		0.2981	0.4431	0.1606	0.4005	0.1727	0.761054	low		0.0865	0.3586	0.9508	0.206	0.9538	0.6006	0.633696	low		0.4701	0.5536	0.0605	0.6484	0.972	0.783543	low		0.7758	0.8916	0.1156	0.1763	0.2485	0.1931	0.798397	low		0.1094	0.2914	0.1335	0.6125
	TCGA-BP-4804	3.99726	0	0.6957	0.4495	0.3448	0.7948	0.427	2.04538	high		0.482	0.3309	0.1608	0.634	0.4014	2.37147	high		0.1593	0.211	0.9544	0.4852	0.927	0.5196	0.687552	low		0.4495	0.2359	0.06	0.6132	0.5171	2.09513	high		0.6957	0.9138	0.1044	0.3448	0.1746	0.1558	1.13467	high		0.1061	0.3517	0.139	0.427
	TCGA-BP-4807	0.578082	0	0.86	0.5191	0.3032	0.845	0.847	0.672059	low		0.2167	0.5918	0.1926	0.3915	0.1202	0.529456	low		0.0866	0.1316	0.9794	0.3146	0.9203	0.4978	0.437906	low		0.5191	0.518	0.0555	0.8742	0.8095	0.705009	low		0.86	0.8786	0.0463	0.3032	0.303	0.1626	0.540572	low		0.0578	0.0635	0.0462	0.847
	TCGA-BP-4959	7.28767	0	0.8672	0.697	0.2433	0.8933	0.8789	0.391036	low		0.2894	0.6766	0.1682	0.2434	0.1519	0.397928	low		0.0525	0.1611	1	0.3115	0.9366	0.6838	0.48613	low		0.697	0.5545	0.0925	0.8893	0.8327	0.478447	low		0.8672	0.9273	0.0656	0.2433	0.2459	0.2246	0.700068	low		0.0547	0.083	0.0809	0.8789
	TCGA-BP-4960	5.95068	0	0.6493	0.5766	0.5416	0.8057	0.5438	1.89875	high		0.7042	0.4035	0.282	0.7433	0.2294	2.86806	high		0.1435	0.3766	0.7626	0.7953	0.946	0.9547	3.23163	high		0.5766	0.292	0.1542	0.3641	0.5171	2.29648	high		0.6493	0.8089	0.2527	0.5416	0.2151	0.1154	2.05948	high		0.1695	0.1971	0.6289	0.5438
	TCGA-BP-4961	5.30137	0	0.8259	0.6422	0.2713	0.9726	0.7574	0.504924	low		0.1505	0.4565	0.1125	0.2729	0.1401	0.453183	low		0.0836	0.2225	0.9332	0.2525	0.9507	0.6422	0.584011	low		0.6422	0.5094	0.0171	0.8291	0.925	0.4675	low		0.8259	0.9194	0.0829	0.2713	0.2812	0.1776	0.613769	low		0.09	0.2044	0.1247	0.7574
	TCGA-BP-4962	4.89041	0	0.8678	0.4637	0.3529	0.914	0.696	0.892631	high		0.5478	0.5053	0.2214	0.3675	0.1339	0.880437	high		0.0621	0.1767	0.8993	0.1126	0.9009	0.757	0.763572	low		0.4637	0.5091	0.1563	0.6636	0.815	1.19253	high		0.8678	0.8761	0.1201	0.3529	0.1821	0.0953	0.786804	low		0.0215	0.2281	0.0883	0.696
	TCGA-BP-4963	5.02466	0	0.7968	0.6317	0.3374	0.8692	0.6367	0.827969	low		0.187	0.5011	0.2069	0.2535	0.2627	0.681542	low		0.0736	0.2985	0.8678	0.6884	0.9527	0.6471	1.10401	high		0.6317	0.5509	0.1272	0.8079	0.7845	0.675042	low		0.7968	0.9079	0.1221	0.3374	0.2304	0.226	1.08976	high		0.1258	0.3657	0.2999	0.6367
	TCGA-BP-4964	5.10137	0	0.792	0.6593	0.3097	0.9401	0.7604	0.566603	low		0.3102	0.5643	0.1188	0.3996	0.2532	0.660259	low		0.1054	0.2006	0.9704	0.7067	0.9786	0.7009	0.699129	low		0.6593	0.4584	0.0121	0.7419	0.8999	0.532722	low		0.792	0.8744	0.096	0.3097	0.2555	0.1701	0.816932	low		0.0491	0.1866	0.2017	0.7604
	TCGA-BP-4965	5.12603	0	0.8333	0.8347	0.1866	0.8874	0.7491	0.359863	low		0.226	0.5145	0.1513	0.2491	0.1661	0.4927	low		0.0893	0.233	0.9717	0.1937	0.9625	0.7206	0.537713	low		0.8347	0.5223	0.0192	0.839	0.8085	0.348026	low		0.8333	0.9307	0.0399	0.1866	0.308	0.1735	0.438974	low		0.0271	0.1567	0.1175	0.7491
	TCGA-BP-4967	0.561644	0	0.6962	0.5647	0.1865	0.8866	0.8375	0.61637	low		0.3479	0.4703	0.2676	0.1699	0.1177	0.644021	low		0.0463	0.3302	0.9547	0.6163	0.9456	0.6722	0.875966	low		0.5647	0.6322	0.075	0.6858	0.8437	0.668188	low		0.6962	0.8819	0.0943	0.1865	0.326	0.1869	0.672922	low		0.0707	0.0975	0.3089	0.8375
	TCGA-BP-4968	4.78356	0	0.7051	0.6132	0.3975	0.8271	0.9156	0.739616	low		0.7268	0.58	0.2191	0.4911	0.2697	1.40746	high		0.1091	0.2012	0.9408	0.5596	0.9645	0.9369	1.00346	high		0.6132	0.2474	0.0581	0.2408	0.4523	2.2556	high		0.7051	0.8777	0.0616	0.3975	0.2979	0.1639	0.80643	low		0.0974	0.1727	0.3262	0.9156
	TCGA-BP-4969	4.91507	0	0.6937	0.7725	0.4159	0.6988	0.9197	0.699591	low		0.5316	0.6237	0.2071	0.349	0.2933	0.914297	high		0.1171	0.2693	0.932	0.6432	0.9743	0.6564	0.822065	low		0.7725	0.2715	0.0154	0.4577	0.6584	0.922716	high		0.6937	0.868	0.0693	0.4159	0.2948	0.1794	0.930772	high		0.2163	0.0726	0.5666	0.9197
	TCGA-BP-4970	1.1863	0	0.8512	0.8207	0.1711	0.9599	0.7139	0.332406	low		0.2095	0.4055	0.2473	0.3139	0.063	0.663511	low		0.0526	0.1457	0.935	0.263	0.9031	0.784	0.73897	low		0.8207	0.6015	0.1403	0.8223	0.8653	0.393376	low		0.8512	0.9058	0.0496	0.1711	0.2781	0.1614	0.479835	low		0.0539	0.1505	0.1771	0.7139
	TCGA-BP-4971	4.07397	0	0.4285	0.5124	0.4401	0.489	0.471	4.4693	high		0.7473	0.4619	0.4592	0.7249	0.3388	5.08457	high		0.214	0.4405	0.8187	0.9062	0.9548	0.9534	3.5602	high		0.5124	0.1818	0.0596	0.2178	0.4265	3.19407	high		0.4285	0.7689	0.1792	0.4401	0.1692	0.2957	5.22033	high		0.3333	0.3723	0.8667	0.471
	TCGA-BP-4972	4.11507	0	0.8486	0.6701	0.2793	0.8076	0.8289	0.545475	low		0.2802	0.5576	0.1205	0.3848	0.1823	0.555747	low		0.0595	0.1582	0.9359	0.4907	0.9409	0.5207	0.534055	low		0.6701	0.5267	0.0521	0.8083	0.7277	0.58965	low		0.8486	0.8877	0.0814	0.2793	0.2714	0.152	0.60516	low		0.0798	0.1067	0.1537	0.8289
	TCGA-BP-4973	3.79178	0	0.6972	0.507	0.2549	0.9285	0.7771	0.775419	low		0.3575	0.5178	0.1851	0.3002	0.2239	0.72222	low		0.0817	0.2753	0.8899	0.6105	0.9528	0.9026	1.33121	high		0.507	0.57	0.1114	0.7541	0.9331	0.740338	low		0.6972	0.8824	0.1153	0.2549	0.3162	0.1844	0.780177	low		0.1149	0.1289	0.2269	0.7771
	TCGA-BP-4974	0.578082	1	0.5408	0.6589	0.3115	0.8886	0.5403	1.19385	high		0.2636	0.4324	0.1766	0.4943	0.3985	1.39543	high		0.2269	0.3365	0.8501	0.5898	0.9669	0.7176	1.50266	high		0.6589	0.252	0.0493	0.6028	0.6623	1.10937	high		0.5408	0.833	0.1129	0.3115	0.1889	0.2416	2.18437	high		0.1935	0.3651	0.2766	0.5403
	TCGA-BP-4975	3.92603	0	0.8154	0.6177	0.2776	0.9432	0.79	0.538067	low		0.1846	0.4887	0.1022	0.3543	0.1875	0.530698	low		0.0751	0.2093	0.9633	0.1995	0.9795	0.6714	0.449336	low		0.6177	0.6206	0.0211	0.8747	0.9035	0.423778	low		0.8154	0.8902	0.0932	0.2776	0.3699	0.162	0.485884	low		0.052	0.1326	0.1015	0.79
	TCGA-BP-4976	4.47123	0	0.914	0.7563	0.1832	0.9649	0.9461	0.244849	low		0.1206	0.5858	0.0527	0.1641	0.0556	0.22135	low		0.0274	0.0944	0.9914	0.0748	0.9542	0.6481	0.313095	low		0.7563	0.6502	0.0333	0.9192	0.9278	0.291196	low		0.914	0.9346	0.0514	0.1832	0.3367	0.1036	0.279717	low		0.0225	0.0645	0.0373	0.9461
	TCGA-BP-4977	1.24384	0	0.8168	0.5766	0.336	0.897	0.9042	0.569628	low		0.2411	0.5798	0.2561	0.3433	0.2081	0.720004	low		0.0734	0.2917	0.9022	0.4733	0.9416	0.715	0.965034	high		0.5766	0.6729	0.0511	0.6395	0.8949	0.583684	low		0.8168	0.8826	0.0667	0.336	0.3587	0.2627	0.738957	low		0.0257	0.2077	0.4269	0.9042
	TCGA-BP-4981	3.00548	1	0.6022	0.451	0.5093	0.8124	0.4215	2.87933	high		0.8095	0.5875	0.1812	0.6587	0.3926	2.19614	high		0.1193	0.3399	0.9069	0.9025	0.93307	0.8122	1.82614	high		0.451	0.1693	0.065	0.3075	0.5241	3.06149	high		0.6022	0.8257	0.0958	0.5093	0.1504	0.1606	2.09233	high		0.1565	0.3337	0.5476	0.4215
	TCGA-BP-4982	2.77808	0	0.652	0.6237	0.1862	0.861	0.7676	0.678175	low		0.2231	0.4321	0.1501	0.3241	0.2226	0.700583	low		0.1066	0.2642	0.9502	0.3372	0.93692	0.705	0.765754	low		0.6237	0.4826	0.0291	0.8404	0.8799	0.535442	low		0.652	0.9375	0.0675	0.1862	0.2776	0.1841	0.69154	low		0.0928	0.1716	0.2541	0.7676
	TCGA-BP-4983	3.87123	0	0.3458	0.3127	0.559	0.8933	0.1386	7.54156	high		0.4884	0.0284	0.1284	0.5412	0.3214	2.76027	high		0.1193	0.1886	0.9613	0.9468	0.9085	0.8522	1.47002	high		0.3127	0.164	0.2105	0.6955	0.9031	2.45199	high		0.3458	0.8787	0.1835	0.559	0.0898	0.3199	7.54174	high		0.0665	0.3108	0.8134	0.1386
	TCGA-BP-4985	2.60822	1	0.2212	0.3173	0.1009	0.7722	0.1205	5.59177	high		0.2587	0.3941	0.2151	0.5763	0.1492	1.118	high		0.1209	0.2567	0.914	0.6098	0.8997	0.7666	1.36963	high		0.3173	0.0771	0.0098	0.7009	0.2726	3.69153	high		0.2212	0.8955	0.154	0.1009	0.138	0.1767	2.45386	high		0.1527	0.3979	0.244	0.1205
	TCGA-BP-4986	2.15068	0	0.6227	0.3901	0.2121	0.9254	0.4124	1.72808	high		0.3113	0.3713	0.1133	0.2739	0.3789	0.974136	high		0.055	0.2903	0.9002	0.6602	0.9669	0.571	0.795326	low		0.3901	0.3982	0.1483	0.8778	0.8204	1.2679	high		0.6227	0.9247	0.0967	0.2121	0.2601	0.2471	1.08498	high		0.056	0.445	0.2695	0.4124
	TCGA-BP-4987	3.07945	0	0.7274	0.7151	0.2649	0.9171	0.8108	0.501649	low		0.2452	0.758	0.158	0.3818	0.2372	0.466684	low		0.0767	0.2371	0.9825	0.1591	0.9582	0.6765	0.482195	low		0.7151	0.5297	0.0442	0.8579	0.9149	0.405687	low		0.7274	0.9118	0.1042	0.2649	0.326	0.1741	0.642281	low		0.1512	0.1449	0.2323	0.8108
	TCGA-BP-4988	2.26849	1	0.29	0.4814	0.6572	0.4296	0.2653	11.6346	high		0.8288	0.2296	0.4079	0.6318	0.2555	5.31873	high		0.2789	0.4713	0.8345	0.9719	0.930122	1	4.98559	high		0.4814	0.2259	0.696	0.1818	0.4041	12.0317	high		0.29	0.8233	0.1581	0.6572	0.2052	0.2269	4.85274	high		0.4057	0.3635	0.6241	0.2653
	TCGA-BP-4989	0.323288	0	0.6547	0.5733	0.3913	0.5037	0.5031	2.57611	high		0.7554	0.284	0.3865	0.5537	0.3712	4.85055	high		0.2272	0.2751	0.8746	0.933	0.9087	0.876	2.65759	high		0.5733	0.1908	0.1496	0.392	0.483	2.62661	high		0.6547	0.8426	0.0585	0.3913	0.194	0.292	2.06087	high		0.1578	0.2406	0.7017	0.5031
	TCGA-BP-4991	3.87123	0	0.6432	0.6707	0.2981	0.8886	0.7747	0.703497	low		0.1997	0.5377	0.1325	0.2819	0.2126	0.506744	low		0.1329	0.3569	0.9564	0.2008	0.9553	0.7441	0.799677	low		0.6707	0.4343	0.0092	0.7132	0.7589	0.642519	low		0.6432	0.9168	0.0909	0.2981	0.3315	0.2501	0.935258	high		0.0953	0.1505	0.2766	0.7747
	TCGA-BP-4992	1.3726	0	0.3043	0.4547	0.7842	0.4267	0.5216	9.85054	high		0.939	0.3248	0.5542	0.7315	0.2998	9.02959	high		0.425	0.6484	0.7	1	0.9428	0.9397	11.2005	high		0.4547	0.1263	0.6593	0.3141	0.5623	9.84264	high		0.3043	0.7014	0.1309	0.7842	0.1116	0.2652	10.6874	high		0.3372	0.2765	1	0.5216
	TCGA-BP-4993	0.484932	0	0.7925	0.4965	0.4677	0.9162	0.8402	0.881144	high		0.4372	0.6006	0.24	0.4199	0.2312	0.926947	high		0.194	0.2727	0.8522	0.3001	0.9296	0.9326	1.61685	high		0.4965	0.4348	0.0172	0.6379	0.7002	1.08258	high		0.7925	0.8547	0.098	0.4677	0.2514	0.1242	0.88889	high		0.0704	0.2104	0.1679	0.8402
	TCGA-BP-4994	3.58356	0	0.8965	0.6481	0.1057	0.7923	0.9075	0.376209	low		0.2707	0.7418	0.2206	0.0583	0.1618	0.31397	low		0.0915	0.2382	0.9318	0.2701	0.8746	0.8682	1.19572	high		0.6481	0.8172	0.0148	0.7817	0.5623	0.495701	low		0.8965	0.9208	0.089	0.1057	0.2376	0.1887	0.551651	low		0.0139	0.0951	0.3397	0.9075
	TCGA-BP-4995	3.75616	0	0.8954	0.781	0.1483	0.8944	0.8541	0.291887	low		0.2189	0.6784	0.2014	0.1652	0.1541	0.364257	low		0.0959	0.1343	0.9507	0.2699	0.9154	0.7294	0.653229	low		0.781	0.7802	0.0073	0.7722	0.6785	0.342088	low		0.8954	0.9176	0.1101	0.1483	0.2882	0.1773	0.498906	low		0.0308	0.1497	0.2108	0.8541
	TCGA-BP-4998	2.55342	0	0.6556	0.5471	0.2402	0.8715	0.5729	1.10676	high		0.3537	0.4457	0.3448	0.2555	0.1503	0.984761	high		0.0889	0.3044	0.873	0.5567	0.94244	0.8122	1.32965	high		0.5471	0.5047	0.1337	0.5443	0.8415	1.04892	high		0.6556	0.88	0.1186	0.2402	0.215	0.1892	1.17237	high		0.0683	0.2999	0.467	0.5729
	TCGA-BP-4999	3.46849	0	0.7438	0.6461	0.2766	0.9393	0.7864	0.567337	low		0.2403	0.4594	0.0881	0.4599	0.1705	0.634677	low		0.0593	0.2171	0.9514	0.3072	0.9736	0.6962	0.530812	low		0.6461	0.3936	0.036	0.8126	0.8941	0.584433	low		0.7438	0.9049	0.0648	0.2766	0.2871	0.2056	0.751084	low		0.1128	0.2139	0.2197	0.7864
	TCGA-BP-5000	1.54247	0	0.6193	0.7167	0.5169	0.8371	0.6684	1.16772	high		0.6049	0.483	0.3214	0.6587	0.1746	2.01506	high		0.1086	0.2705	0.8235	0.5948	0.9317	0.8771	1.76594	high		0.7167	0.3344	0.028	0.6024	0.6922	0.82268	high		0.6193	0.8839	0.0589	0.5169	0.2318	0.145	1.20059	high		0.1652	0.2357	0.2141	0.6684
	TCGA-BP-5001	3.22466	0	0.5749	0.7885	0.568	0.7882	0.9435	0.83462	low		0.694	0.6382	0.3072	0.6587	0.298	2.06386	high		0.1288	0.3778	0.7194	0.6566	0.9678	0.8898	2.67467	high		0.7885	0.1546	0.0298	0.4841	0.5623	1.15218	high		0.5749	0.8981	0.0364	0.568	0.2179	0.132	1.25312	high		0.3893	0.0628	0.6094	0.9435
	TCGA-BP-5004	3.08493	0	0.8364	0.6075	0.2181	0.9241	0.9424	0.400166	low		0.187	0.5706	0.0912	0.2926	0.2727	0.488548	low		0.1142	0.333	0.9147	0.3277	0.9377	0.6169	0.851854	low		0.6075	0.5289	0.0076	0.8262	0.8548	0.523099	low		0.8364	0.9204	0.0374	0.2181	0.2544	0.1978	0.600135	low		0.056	0.0952	0.3151	0.9424
	TCGA-BP-5006	2.30137	0	0.8329	0.6497	0.3224	0.9516	0.8573	0.472522	low		0.1528	0.5357	0.0926	0.3228	0.2774	0.531427	low		0.0496	0.225	0.9499	0.1332	0.9627	0.606	0.43538	low		0.6497	0.4938	0.0445	0.8586	0.933	0.476811	low		0.8329	0.8915	0.0596	0.3224	0.2689	0.1519	0.620072	low		0.0484	0.1956	0.219	0.8573
	TCGA-BP-5007	3.12329	0	0.7243	0.6237	0.35	0.7705	0.8814	0.758201	low		0.3316	0.567	0.1623	0.2883	0.2253	0.60452	low		0.0722	0.2156	0.909	0.6678	0.9558	0.578	0.749094	low		0.6237	0.4394	0.0317	0.6778	0.6314	0.880969	high		0.7243	0.9086	0.0451	0.35	0.3179	0.1599	0.614327	low		0.1253	0.1882	0.1809	0.8814
	TCGA-BP-5008	2.93425	0	0.7388	0.6425	0.2602	0.8852	0.7745	0.620938	low		0.342	0.5778	0.1466	0.3802	0.184	0.60377	low		0.0529	0.175	0.9508	0.4386	0.9423	0.821	0.740716	low		0.6425	0.4101	0.0622	0.6969	0.7752	0.777974	low		0.7388	0.8742	0.0528	0.2602	0.2732	0.1714	0.718592	low		0.09	0.2477	0.2007	0.7745
	TCGA-BP-5009	2.99178	1	0.7021	0.3852	0.33	0.8448	0.3438	2.34058	high		0.6194	0.4371	0.3382	0.4169	0.3974	2.54962	high		0.0917	0.2178	0.9633	0.5445	0.8654	0.8433	1.31173	high		0.3852	0.3059	0.0635	0.4611	0.7585	1.95603	high		0.7021	0.9077	0.1278	0.33	0.209	0.1977	1.22362	high		0.2563	0.315	0.5375	0.3438
	TCGA-BP-5010	2.40548	1	0.682	0.3376	0.5584	0.8097	0.5438	2.85611	high		0.7599	0.181	0.37	0.736	0.4154	7.85194	high		0.134	0.3796	0.658	0.2949	0.8655	0.876	3.91343	high		0.3376	0.1205	0.0421	0.422	0.529267	3.50897	high		0.682	0.775	0.1968	0.5584	0.1356	0.2214	3.60987	high		0.2835	0.4353	0.7516	0.5438
	TCGA-BP-5168	4.00822	1	0.8152	0.4513	0.378	0.9085	0.8625	0.796728	low		0.4299	0.6725	0.1075	0.6002	0.1339	0.621369	low		0.0773	0.1288	0.9667	0.0801	0.9277	0.4856	0.354175	low		0.4513	0.4091	0.0035	0.8133	0.8068	0.893813	high		0.8152	0.9451	0.0388	0.378	0.3445	0.0993	0.371225	low		0.0782	0.1868	0.0777	0.8625
	TCGA-BP-5169	0.528767	0	0.5166	0.5432	0.8917	0.7821	0.5042	4.40924	high		0.8877	0.3992	0.398	0.6457	0.2576	4.19385	high		0.1626	0.4128	0.6824	0.871	0.8611	0.9008	6.6062	high		0.5432	0.2198	0.1674	0.315	0.5856	2.68446	high		0.5166	0.8899	0.1057	0.8917	0.1252	0.1421	3.34258	high		0.2289	0.4244	0.4466	0.5042
	TCGA-BP-5170	6.60822	0	0.8199	0.8308	0.2051	0.9847	0.2998	0.64173	low		0.5689	0.5743	0.0455	0.55	0.1307	0.659702	low		0.0463	0.2098	0.9775	0.2855	0.8908	0.8553	0.854817	low		0.8308	0.4957	0.02	0.5848	0.9666	0.389251	low		0.8199	0.8696	0.0666	0.2051	0.1808	0.1496	0.779557	low		0.0215	0.3563	0.1949	0.2998
	TCGA-BP-5173	0.169863	1	0.851	0.7398	0.3916	0.9696	0.9059	0.391947	low		0.2599	0.4113	0.1064	0.3039	0.0589	0.472696	low		0.0651	0.1857	0.9473	0.2249	0.9713	0.6157	0.438208	low		0.7398	0.686	0.0066	0.7468	0.9339	0.321523	low		0.851	0.889	0.0145	0.3916	0.3243	0.1253	0.451297	low		0.1094	0.1018	0.0832	0.9059
	TCGA-BP-5174	6.18356	0	0.8388	0.5787	0.3039	0.8728	0.9013	0.548327	low		0.3871	0.6827	0.3298	0.2822	0.2097	0.761903	low		0.09	0.1566	0.927	0.1671	0.93336	0.6313	0.537574	low		0.5787	0.5293	0.0354	0.5881	0.6704	0.91172	high		0.8388	0.9231	0.0385	0.3039	0.1993	0.1928	0.775576	low		0.054	0.1218	0.3262	0.9013
	TCGA-BP-5175	2.55342	0	0.6485	0.5972	0.5126	0.76979	0.8611	1.1505	high		0.7434	0.5109	0.3194	0.4911	0.4526	2.9663	high		0.1126	0.2786	0.9516	0.6129	0.7298	1	3.83458	high		0.5972	0.1838	0.1338	0.2946	0.6061	2.33675	high		0.6485	0.8915	0.1125	0.5126	0.1908	0.1456	1.4528	high		0.1094	0.199	0.7177	0.8611
	TCGA-BP-5176	4.35616	1	0.8438	0.6808	0.3549	0.9318	0.9095	0.43995	low		0.3554	0.5204	0.2422	0.4269	0.1113	0.791078	low		0.0483	0.2236	1	0.211	0.92545	0.4707	0.395653	low		0.6808	0.615	0.0085	0.7733	0.6922	0.51086	low		0.8438	0.9297	0.0583	0.3549	0.2515	0.0882	0.48874	low		0.0703	0.0803	0.1111	0.9095
	TCGA-BP-5177	0.80274	0	0.606	0.529	0.2046	0.9723	0.8111	0.693626	low		0.5301	0.5258	0.0856	0.5755	0.089	0.730108	low		0.0479	0.2163	0.9084	0.2332	0.9679	0.702	0.578006	low		0.529	0.2567	0.0034	0.6835	0.8525	0.987403	high		0.606	0.9026	0.0367	0.2046	0.3149	0.0809	0.469137	low		0.1035	0.1779	0.1326	0.8111
	TCGA-BP-5178	5.23836	1	0.816	0.5695	0.5007	0.6994	0.754	1.24789	high		0.5007	0.3674	0.2833	0.5145	0.1582	1.60754	high		0.0402	0.1513	0.9304	0.5293	0.8487	0.9062	1.38237	high		0.5695	0.3689	0.1282	0.8648	0.5098	1.24593	high		0.816	0.8932	0.2077	0.5007	0.1374	0.1393	1.60201	high		0.0678	0.1217	0.3262	0.754
	TCGA-BP-5180	6.2	0	0.8007	0.6689	0.4068	0.9625	0.6815	0.690098	low		0.419	0.529	0.1196	0.0968	0.1074	0.379328	low		0.0536	0.2611	0.956	0.2163	0.9293	0.6445	0.601277	low		0.6689	0.5506	0.0833	0.6275	0.9357	0.575554	low		0.8007	0.9262	0.2188	0.4068	0.255	0.1442	0.965147	high		0.0843	0.3677	0.2374	0.6815
	TCGA-BP-5181	4.09589	0	0.865	0.5706	0.4347	0.9322	0.8286	0.662482	low		0.2506	0.7101	0.0332	0.4543	0.0527	0.28616	low		0.0511	0.1497	0.9873	0.0645	0.9638	0.6838	0.359566	low		0.5706	0.6348	0.0176	0.8633	0.8912	0.46822	low		0.865	0.8958	0.0459	0.4347	0.336	0.0896	0.416178	low		0.0518	0.0581	0.0511	0.8286
	TCGA-BP-5182	3.19178	0	0.8241	0.5867	0.3663	0.9259	0.7988	0.649039	low		0.2227	0.5443	0.1399	0.4419	0.1486	0.574479	low		0.0718	0.1829	0.9342	0.4874	0.9684	0.823	0.746975	low		0.5867	0.4872	0.0382	0.8322	0.7269	0.702147	low		0.8241	0.9001	0.0356	0.3663	0.2776	0.152	0.597528	low		0.0808	0.0746	0.4133	0.7988
	TCGA-BP-5183	3.53699	0	0.6666	0.7796	0.3634	0.936	0.5137	0.848247	high		0.3259	0.3832	0.2366	0.2047	0.3611	1.15292	high		0.0573	0.2668	0.94	0.601	0.9141	0.7894	1.11811	high		0.7796	0.5047	0.0651	0.8053	0.9204	0.398215	low		0.6666	0.8992	0.0893	0.3634	0.209	0.1206	0.954282	high		0.0462	0.3312	0.6772	0.5137
	TCGA-BP-5184	3.10411	0	0.7595	0.8547	0.2781	0.9181	0.9308	0.317256	low		0.2802	0.4731	0.1672	0.4248	0.0811	0.624353	low		0.0506	0.1089	0.9577	0.1616	0.9352	0.5687	0.38656	low		0.8547	0.435	0.0272	0.7747	0.8701	0.375021	low		0.7595	0.8677	0.0158	0.2781	0.3024	0.1006	0.469528	low		0.0699	0.0914	0.3212	0.9308
	TCGA-BP-5185	3.10137	0	0.8009	0.7371	0.6138	0.889	0.9229	0.642126	low		0.8848	0.6418	0.1382	0.63692	0.2962	1.541	high		0.0478	0.162	1	0.2868	0.9337	1	0.731638	low		0.7371	0	0.1992	0.0839	0.2574	4.52653	high		0.8009	0.8771	0.1237	0.6138	0.2571	0.1291	1.04697	high		0.2591	0.0646	0.5867	0.9229
	TCGA-BP-5186	1.89863	0	0.7916	0.839	0.2608	0.8922	0.9404	0.312912	low		0.2915	0.52	0.1779	0.4472	0.1728	0.739997	low		0.0549	0.1582	0.9358	0.1888	0.9498	0.3691	0.330263	low		0.839	0.4349	0.0133	0.7821	0.8509	0.382691	low		0.7916	0.8774	0.0298	0.2608	0.2867	0.1657	0.58732	low		0.0732	0.0556	0.2619	0.9404
	TCGA-BP-5187	1.11233	0	0.7925	0.6673	0.2808	0.8517	0.6363	0.738811	low		0.2317	0.4099	0.2141	0.4419	0.2504	1.07242	high		0.0885	0.1649	1	0.1314	0.9001	0.9363	0.74962	low		0.6673	0.4164	0.0379	0.4659	0.6584	0.998292	high		0.7925	0.9242	0.0516	0.2808	0.1573	0.147	0.810516	low		0.1028	0.3517	0.1623	0.6363
	TCGA-BP-5189	2.25205	1	0.7753	0.6338	0.2351	0.9521	0.5559	0.726602	low		0.1606	0.3819	0.3358	0.3726	0.2334	1.25528	high		0.0748	0.2153	0.9296	0.6246	0.931	0.7078	0.914612	low		0.6338	0.5511	0.1225	0.8078	0.8351	0.628764	low		0.7753	0.9032	0.0965	0.2351	0.2238	0.2001	0.887968	high		0.0983	0.3258	0.0626	0.5559
	TCGA-BP-5190	2.76986	0	0.7961	0.4547	0.3753	0.8383	0.8931	0.860481	high		0.3673	0.6577	0.2486	0.2434	0.3681	0.826494	low		0.1193	0.3177	0.982	0.7109	0.9666	0.7481	0.954849	high		0.4547	0.545	0.0465	0.6332	0.3911	1.557	high		0.7961	0.939	0.0355	0.3753	0.1865	0.1675	0.82067	low		0.1802	0.0816	0.31671	0.8931
	TCGA-BP-5191	2.64932	0	0.7101	0.6021	0.6224	0.7185	0.6443	1.85059	high		0.9124	0.4982	0.1899	0.6389	0.30971	2.3646	high		0.1271	0.264	0.7838	0.807	0.6662	0.9121	8.72485	high		0.6021	0.22	0.0743	0.3343	0.3911	2.41229	high		0.7101	0.859	0.136	0.6224	0.1878	0.1394	1.6905	high		0.2706	0.2243	0.5371	0.6443
	TCGA-BP-5192	1.95616	0	0.8311	0.4581	0.1982	0.9773	0.9196	0.489333	low		0.1516	0.6901	0.0834	0.369	0.106	0.302957	low		0.0303	0.1146	0.9679	0.0727	0.9534	0.4951	0.285386	low		0.4581	0.5873	0.0057	0.8845	0.9278	0.577684	low		0.8311	0.9091	0.0392	0.1982	0.3481	0.0881	0.303065	low		0.0252	0.0692	0.146	0.9196
	TCGA-BP-5194	1.11781	0	0.8054	0.7673	0.3272	0.9782	0.8205	0.404556	low		0.1802	0.556	0.1044	0.4112	0.09	0.423148	low		0.0616	0.1701	0.9519	0.118	0.9721	0.5261	0.341236	low		0.7673	0.4798	0.0182	0.9034	0.9662	0.33154	low		0.8054	0.9073	0.0623	0.3272	0.331	0.123	0.463943	low		0.0633	0.0436	0.0448	0.8205
	TCGA-BP-5195	2.05205	0	0.8608	0.5995	0.2042	0.9713	0.7678	0.465975	low		0.2614	0.4159	0.1786	0.476	0.0869	0.756906	low		0.0535	0.2061	0.8845	0.2177	0.9208	0.6133	0.6745	low		0.5995	0.5391	0.1097	0.7542	0.96	0.611984	low		0.8608	0.8832	0.1191	0.2042	0.2931	0.1715	0.597055	low		0.0881	0.1889	0.1005	0.7678
	TCGA-BP-5196	2.78904	0	0.5465	0.3272	0.2396	0.9331	0.2344	2.87989	high		0.5236	0.3097	0.2947	0.6397	0.4004	3.58725	high		0.049	0.2466	0.9627	0.1737	0.9143	0.75	0.682447	low		0.3272	0.3627	0.0641	0.6548	0.8792	1.48986	high		0.5465	0.8539	0.1022	0.2396	0.1837	0.1618	1.41903	high		0.0211	0.2357	0.139	0.2344
	TCGA-BP-5198	1.65205	0	0.876	0.3957	0.4646	0.9551	0.4415	1.61888	high		0.23	0.2622	0.2828	0.5851	0.1274	1.5669	high		0.0402	0.2559	0.8466	0.3242	0.8995	0.7794	1.20295	high		0.3957	0.4544	0.1226	0.8705	0.8371	1.09818	high		0.876	0.8435	0.121	0.4646	0.1819	0.203	1.4039	high		0.1024	0.1868	0.1167	0.4415
	TCGA-BP-5199	3.71233	0	0.311	0.499	0.4573	0.8696	0.4853	2.98896	high		0.4592	0.4238	0.3051	0.5627	0.2057	1.7466	high		0.1391	0.2822	0.9349	0.6505	0.9793	1	1.33672	high		0.499	0.1879	0.0923	0.4945	0.6727	2.0105	high		0.311	0.8875	0.1318	0.4573	0.2441	0.1485	2.01615	high		0.1765	0.2117	0.361	0.4853
	TCGA-BP-5200	2.91233	0	0.8951	0.6512	0.2083	0.9696	0.7696	0.407928	low		0.1386	0.5307	0.1451	0.4178	0.0773	0.463823	low		0.0812	0.177	0.9721	0.153	0.8974	0.816	0.720831	low		0.6512	0.6058	0.0332	0.892	0.9024	0.405536	low		0.8951	0.9102	0.0811	0.2083	0.2888	0.1322	0.433939	low		0.0402	0.1463	0.0781	0.7696
	TCGA-BP-5201	2.60548	0	0.6808	0.5244	0.4006	0.7541	0.7019	1.39065	high		0.5904	0.4984	0.1906	0.2688	0.2058	0.860251	low		0.0972	0.2118	0.9638	0.3056	0.9255	0.6806	0.660874	low		0.5244	0.4579	0.024	0.7626	0.4353	1.20102	high		0.6808	0.928	0.0523	0.4006	0.2424	0.1243	0.763522	low		0.0795	0.3483	0.3675	0.7019
	TCGA-BP-5202	0.0794521	0	0.857	0.6789	0.3335	0.9451	0.847	0.452632	low		0.1201	0.616	0.0891	0.258	0.1481	0.315358	low		0.0433	0.1822	0.9576	0.4239	0.9583	0.6727	0.545294	low		0.6789	0.6142	0.0233	0.9343	0.8505	0.377801	low		0.857	0.9155	0.0322	0.3335	0.2739	0.1053	0.449583	low		0.0626	0.0925	0.139	0.847
	TCGA-CJ-4634	9.58356	0	0.8435	0.5948	0.4003	0.8868	0.8561	0.638241	low		0.2834	0.6287	0.2629	0.5174	0.3248	1.12557	high		0.1427	0.285	0.9078	0.5592	0.8836	0.6471	1.34226	high		0.5948	0.3107	0.0289	0.7778	0.8505	0.773057	low		0.8435	0.8835	0.0685	0.4003	0.3132	0.1788	0.66101	low		0.1735	0.1356	0.4207	0.8561
	TCGA-CJ-4635	3.87945	0	0.4889	0.3954	0.2951	0.8443	0.922	1.21255	high		0.3295	0.5491	0.1805	0.4694	0.2737	0.923776	high		0.1402	0.3067	0.8504	0.5359	0.9414	0.515	1.03039	high		0.3954	0.4702	0.1496	0.7005	0.8463	1.32765	high		0.4889	0.9053	0.0189	0.2951	0.2725	0.2719	1.34542	high		0.2495	0.2726	0.4321	0.922
	TCGA-CJ-4636	5.27123	0	0.7367	0.712	0.4877	0.7613	0.6337	1.14433	high		0.6176	0.5182	0.2318	0.3554	0.3755	1.49267	high		0.1502	0.2895	0.8092	0.5671	0.8925	0.792	2.13733	high		0.712	0.2642	0.0953	0.4716	0.4735	1.5052	high		0.7367	0.826	0.0625	0.4877	0.2219	0.2996	2.00554	high		0.1205	0.1568	0.361	0.6337
	TCGA-CJ-4637	6.10137	1	0.5713	0.4325	0.6039	0.7267	0.5174	3.51607	high		0.5144	0.3085	0.2242	0.4862	0.2162	1.67342	high		0.2351	0.3917	0.871	0.6707	0.912	0.7776	2.35028	high		0.4325	0.3493	0.1931	0.5239	0.5763	2.50403	high		0.5713	0.8688	0.1117	0.6039	0.175	0.301	3.49272	high		0.1111	0.4551	0.5253	0.5174
	TCGA-CJ-4638	1.18082	1	0.2825	0	0.4181	0.9349	0.7393	4.46697	high		0.9662	0.6137	0.2216	0.7202	0.575	4.18071	high		0.1626	0.4251	0.8	0.6469	0.94275	0.7326	2.18974	high		0	0.1839	0.0359	0.229	0.794	5.83927	high		0.2825	0.9134	0.0644	0.4181	0.1029	0.3339	5.00481	high		0.4418	0.312	1	0.7393
	TCGA-CJ-4639	8.84658	0	0.8023	0.7435	0.298	0.8568	0.8803	0.447659	low		0.2791	0.5933	0.11	0.3915	0.3276	0.685014	low		0.0783	0.362	0.9626	0.4744	0.9698	0.6895	0.778359	low		0.7435	0.5844	0.0472	0.7501	0.8525	0.428258	low		0.8023	0.8995	0.0614	0.298	0.3354	0.1885	0.569329	low		0.0578	0.1114	0.5071	0.8803
	TCGA-CJ-4640	9.53425	0	0.9285	0.4464	0.1478	0.803	0.6905	0.753714	low		0.4997	0.5413	0.3009	0.3297	0.0477	0.773531	low		0.165	0.1148	0.9842	0.2945	0.9257	0.606	0.525522	low		0.4464	0.4586	0.1209	0.7139	0.6473	1.4128	high		0.9285	0.9059	0.0232	0.1478	0.2554	0.1522	0.408691	low		0.0448	0.1363	0.2531	0.6905
	TCGA-CJ-4641	4.55068	1	0.7153	0.4786	0.3343	0.771	0.6861	1.30769	high		0.479	0.4103	0.2979	0.3771	0.4172	2.09374	high		0.1495	0.283	0.8938	0.7748	0.9633	0.6895	1.20537	high		0.4786	0.352	0.11	0.6185	0.743	1.45205	high		0.7153	0.8605	0.0562	0.3343	0.1794	0.3138	1.90583	high		0.056	0.2159	0.4116	0.6861
	TCGA-CJ-4643	4.91233	0	0.7659	0.6093	0.3552	0.8645	0.9023	0.622504	low		0.264	0.5759	0.3578	0.3535	0.1911	0.935522	high		0.1332	0.2052	0.9574	0.6984	0.93794	0.6879	0.90502	low		0.6093	0.4776	0.057	0.6949	0.9031	0.658727	low		0.7659	0.821	0.0854	0.3552	0.2803	0.1986	1.00877	high		0.1393	0.1189	0.3629	0.9023
	TCGA-CJ-4644	0.920548	1	0.9432	0.6641	0.47	0.8362	0.7969	0.645645	low		0.2007	0.4676	0.2512	0.3449	0.0362	0.592271	low		0.0627	0.1094	1	0.1612	0.8566	0.4943	0.45729	low		0.6641	0.6057	0.047	0.8106	0.5623	0.644898	low		0.9432	0.8747	0.0791	0.47	0.198	0.1066	0.729126	low		0.1775	0.1034	0.0539	0.7969
	TCGA-CJ-4868	1.76986	1	0.6448	0.3912	0.3856	0.8443	0.3828	2.55576	high		0.4608	0.1932	0.3151	0.4654	0.3306	2.96869	high		0.193	0.2589	0.9828	0.6915	0.9388	0.8234	1.19972	high		0.3912	0.2412	0.0493	0.5497	0.483	2.54766	high		0.6448	0.8997	0.1789	0.3856	0.2641	0.1679	1.21972	high		0.0857	0.4249	0.139	0.3828
	TCGA-CJ-4869	6.99726	0	0.8599	0.5135	0.406	0.8097	0.6241	1.16499	high		0.5926	0.4121	0.167	0.6002	0.1963	1.47059	high		0.0864	0.1202	0.9235	0.3926	0.9399	0.8724	0.80459	low		0.5135	0.5322	0.1709	0.9064	0.6427	1.02979	high		0.8599	0.8816	0.0509	0.406	0.1999	0.1462	0.809966	low		0	0.2218	0.2664	0.6241
	TCGA-CJ-4870	4.10411	0	0.8508	0.6749	0.404	0.9922	0.8883	0.445334	low		0.3483	0.7089	0.0858	0.2105	0.0393	0.246836	low		0.0573	0.1095	0.9621	0.0865	0.9535	0.6492	0.372018	low		0.6749	0.5997	0.0044	0.9213	0.9844	0.325322	low		0.8508	0.8596	0.0336	0.404	0.2735	0.0499	0.462132	low		0.0885	0.1234	0.1016	0.8883
	TCGA-CJ-4871	6.63836	0	0.8701	0.4689	0.2227	0.8816	0.6291	0.847417	high		0.2032	0.4349	0.1452	0.5914	0.1779	0.901045	high		0.0592	0.1762	1	0.4147	0.878	0.8457	0.89209	low		0.4689	0.5898	0.0487	0.8031	0.7771	0.78657	low		0.8701	0.9277	0.1255	0.2227	0.2229	0.1766	0.706829	low		0.0347	0.1822	0.1041	0.6291
	TCGA-CJ-4872	3.93151	0	0.7041	0.4127	0.5664	0.8404	0.5506	2.31282	high		0.4146	0.2834	0.1626	0.5296	0.1739	1.33872	high		0.075	0.2513	0.8613	0.3166	0.9115	0.7561	1.09932	high		0.4127	0.2249	0.0051	0.4933	0.815	1.65324	high		0.7041	0.8371	0.1061	0.5664	0.1702	0.1466	1.70737	high		0.0757	0.2634	0.0904	0.5506
	TCGA-CJ-4873	4.86575	0	0.4463	0.5842	0.5417	0.5606	0.3449	4.81467	high		0.7959	0.3703	0.2347	0.3335	0.4265	2.43385	high		0.171	0.3656	0.9362	0.7906	0.954	0.6039	1.19773	high		0.5842	0.1729	0.0265	0.2182	0.6498	2.02006	high		0.4463	0.8457	0.0959	0.5417	0.1547	0.3194	4.54654	high		0.1292	0.2606	0.6832	0.3449
	TCGA-CJ-4874	6.25479	0	0.9051	0.4942	0.2218	0.9144	0.8221	0.5489	low		0.2976	0.4703	0.0672	0.2345	0.0311	0.344181	low		0.0453	0.1532	0.9733	0.1339	0.9525	0.6133	0.378313	low		0.4942	0.541	0.0557	0.8441	0.8232	0.732506	low		0.9051	0.8845	0.0613	0.2218	0.2922	0.0673	0.34599	low		0.0753	0.1689	0.0852	0.8221
	TCGA-CJ-4875	9.73699	1	0.6336	0.6631	0.5172	0.8443	0.6844	1.21967	high		0.7806	0.5179	0.2106	0.4911	0.3282	1.8046	high		0.148	0.3591	0.8753	0.4624	0.9152	0.7709	1.59462	high		0.6631	0.2263	0.138	0.596	0.5069	1.62236	high		0.6336	0.8181	0.0475	0.5172	0.2498	0.2824	2.04719	high		0.1821	0.1904	0.4587	0.6844
	TCGA-CJ-4876	5.35616	0	0.8089	0.2822	0.4909	0.7966	0.9736	1.29314	high		0.5641	0.5475	0.2163	0.407	0.3755	1.40004	high		0.1209	0.3191	0.9297	0.2719	0.912	0.7256	1.00539	high		0.2822	0.386	0	0.4569	0.6584	2.18306	high		0.8089	0.9342	0.028	0.4909	0.1876	0.1659	0.908168	high		0.0232	0.3584	0.6115	0.9736
	TCGA-CJ-4878	5.98904	0	0.5438	0.4489	0.4931	0.804	0.92	1.45838	high		0.5645	0.6921	0.405	0.5412	0.3338	1.94935	high		0.3676	0.3483	1	0.7595	0.9138	0.8979	2.28735	high		0.4489	0.3313	0.034	0.479	0.5292	1.99146	high		0.5438	0.8291	0.091	0.4931	0.2504	0.1567	1.56183	high		0.2503	0.2974	0.3262	0.92
	TCGA-CJ-4881	5.51781	0	0.568	0.3478	0.5666	0.7782	0.6782	2.82779	high		0.7119	0.3594	0.3566	0.7827	0.3108	4.65806	high		0.2135	0.3676	0.8219	0.8061	0.9689	0.807	2.21855	high		0.3478	0.1532	0.1969	0.4706	0.5623	4.11229	high		0.568	0.8293	0.0822	0.5666	0.1526	0.2445	3.03133	high		0.1821	0.3664	0.5784	0.6782
	TCGA-CJ-4882	5.1589	0	0.497	0.4199	0.5057	0.8715	0.5247	2.72167	high		0.6412	0.2358	0.4627	0.495	0.1895	3.69666	high		0.1521	0.3784	0.8921	0.7178	0.9518	0.9099	1.94137	high		0.4199	0.1832	0.296	0.3125	0.8137	3.63511	high		0.497	0.8091	0.1473	0.5057	0.2351	0.1551	2.11093	high		0.0588	0.3779	0.6704	0.5247
	TCGA-CJ-4884	4.81918	0	0.6852	0.3874	0.4243	0.7737	0.7998	1.53616	high		0.4272	0.5279	0.2697	0.3787	0.359	1.36166	high		0.0797	0.2287	0.8471	0.6887	0.9557	0.8665	1.38607	high		0.3874	0.5161	0.1346	0.6977	0.7199	1.43259	high		0.6852	0.8984	0.0504	0.4243	0.2311	0.2952	1.58364	high		0.1253	0.2234	0.5848	0.7998
	TCGA-CJ-4885	9.45479	0	0.9048	0.5008	0.2266	0.9273	0.841	0.520649	low		0.3178	0.4296	0.2358	0.1674	0.2312	0.774402	low		0.0577	0.1504	0.8772	0.0753	0.9371	0.7851	0.657535	low		0.5008	0.6381	0.0433	0.9223	0.8426	0.566728	low		0.9048	0.9253	0.0767	0.2266	0.3108	0.122	0.374984	low		0.2316	0.1289	0.1497	0.841
	TCGA-CJ-4886	5.34795	0	0.7879	0.537	0.2549	0.9273	0.7558	0.674034	low		0.3623	0.4277	0.1527	0.3162	0.1243	0.654861	low		0.134	0.1762	0.971	0.467	0.9758	0.4914	0.447205	low		0.537	0.4525	0.011	0.7017	0.8249	0.784136	low		0.7879	0.8824	0.0578	0.2549	0.266	0.1475	0.61937	low		0.0702	0.1302	0.2078	0.7558
	TCGA-CJ-4887	2.55342	1	0.7104	0.5815	0.5153	0.6147	0.9205	1.27121	high		0.5911	0.4549	0.2833	0.3554	0.2527	1.44811	high		0.1322	0.2824	0.9811	0.5948	0.9282	0.876	1.19549	high		0.5815	0.245	0.0834	0.5711	0.2782	2.24254	high		0.7104	0.9122	0.0508	0.5153	0.2401	0.1464	0.941188	high		0.1061	0.1741	0.3584	0.9205
	TCGA-CJ-4888	4.29315	1	0.4983	0.3988	0.3405	0.606	0.3863	4.10902	high		0.5913	0.1367	0.4174	0.4592	0.3823	5.20854	high		0.2652	0.2764	0.9504	0.8769	0.8817	0.7968	2.21721	high		0.3988	0.3128	0.1258	0.5576	0.1075	4.04763	high		0.4983	0.8866	0.0661	0.3405	0.1016	0.2315	2.46454	high		0.2433	0.2573	0.1719	0.3863
	TCGA-CJ-4889	5.33151	0	0.8626	0.715	0.3046	0.9381	0.7255	0.489678	low		0.2935	0.2804	0.2828	0.3644	0.1421	1.21446	high		0.0812	0.217	0.9389	0.2824	0.9484	0.736	0.663934	low		0.715	0.3505	0.1746	0.6469	0.7794	0.937692	high		0.8626	0.8921	0.0399	0.3046	0.2766	0.185	0.60877	low		0.0916	0.1751	0.3526	0.7255
	TCGA-CJ-4890	9.6411	0	0.8571	0.4018	0.2959	0.7995	0.3533	1.86151	high		0.4689	0.1584	0.3129	0.5627	0.2382	3.01215	high		0.1439	0.2523	0.925	0.7759	0.8974	0.8479	1.74405	high		0.4018	0.1766	0.1553	0.5821	0.6255	2.74327	high		0.8571	0.8971	0.0868	0.2959	0.2291	0.1576	0.707408	low		0.0928	0.1958	0.2792	0.3533
	TCGA-CJ-4891	2.24384	1	0.4445	0.2896	0.5807	0.101	0.64457	11.2497	high		0.6845	0.1981	0.5984	0.4911	0.3898	8.50551	high		0.1209	0.466	0.9615	0.9886	0.8632	0.8583	3.06028	high		0.2896	0.155	0.2051	0.5513	0	8.22484	high		0.4445	0.8048	0.1135	0.5807	0.101	0.2895	5.84726	high		0.2835	0.5151	0.8058	0.64457
	TCGA-CJ-4892	4.16712	0	0.7418	0.4557	0.5902	0.8417	0.8968	1.24912	high		0.5955	0.6083	0.2002	0.637	0.2962	1.47142	high		0.1111	0.2259	0.9446	0.5891	0.8502	0.938	1.82594	high		0.4557	0.2475	0.0134	0.4396	0.8955	1.43625	high		0.7418	0.8637	0.0626	0.5902	0.3002	0.1665	0.991975	high		0.1989	0.1403	0.3262	0.8968
	TCGA-CJ-4893	2.05479	0	0.88	0.6272	0.2953	0.9365	0.827	0.476267	low		0.3658	0.3887	0.2879	0.2926	0.134	0.970646	high		0.0541	0.1733	0.9805	0.1814	0.9476	0.6238	0.418333	low		0.6272	0.6112	0.0435	0.7312	0.9643	0.471661	low		0.88	0.8793	0.0823	0.2953	0.2656	0.1553	0.619759	low		0.0837	0.2053	0.094	0.827
	TCGA-CJ-4894	2.30411	1	0.6809	0.625	0.266	0.9325	0.8364	0.591049	low		0.3035	0.462	0.1223	0.1909	0.2159	0.546289	low		0.0911	0.3426	0.917	0.1243	0.9484	0.5973	0.658022	low		0.625	0.4463	0.03	0.6968	0.8126	0.694446	low		0.6809	0.9331	0.0425	0.266	0.2265	0.2298	0.966461	high		0.0691	0.29	0.5476	0.8364
	TCGA-CJ-4895	3.28767	1	0.6542	0.3713	0.308	0.7929	0.3593	2.61992	high		0.4831	0.3499	0.331	0.5174	0.2312	2.13118	high		0.1807	0.2754	0.9638	0.6863	0.9691	0.7196	0.962755	high		0.3713	0.3014	0.1203	0.6183	0.412	2.87483	high		0.6542	0.9082	0.126	0.308	0.1784	0.168	1.26792	high		0.1351	0.3635	0.1949	0.3593
	TCGA-CJ-4897	9.15342	0	0.9022	0.7157	0.2337	0.9496	0.8974	0.317447	low		0.1854	0.6351	0.1102	0.2652	0.1145	0.322379	low		0.0551	0.1083	0.9912	0.093	0.9739	0.6256	0.300437	low		0.7157	0.6881	0.0284	0.8862	0.913	0.314777	low		0.9022	0.9023	0.0496	0.2337	0.289	0.0961	0.368931	low		0.0186	0.078	0.2933	0.8974
	TCGA-CJ-4899	4.1863	0	0.8215	0.7418	0.3718	0.8645	0.825	0.523689	low		0.2667	0.4511	0.2153	0.4003	0.1397	0.783723	low		0.1105	0.3581	0.9579	0.4718	0.9271	0.7921	1.15361	high		0.7418	0.4531	0.0312	0.7663	0.7357	0.550192	low		0.8215	0.9258	0.0615	0.3718	0.2565	0.2086	0.790589	low		0.0627	0.1917	0.2007	0.825
	TCGA-CJ-4900	4.69589	1	0.6891	0.6748	0.4719	0.7613	0.4466	1.68809	high		0.8563	0.3238	0.2537	0.2785	0.2832	2.03229	high		0.1801	0.4604	0.928	0.6419	0.9227	0.9478	2.39359	high		0.6748	0.2297	0.1374	0.4721	0.4304	1.93702	high		0.6891	0.8828	0.1094	0.4719	0.1312	0.3233	3.02092	high		0.1691	0.273	0.4822	0.4466
	TCGA-CJ-4901	3.9726	0	0.6608	0.6029	0.7359	0.8217	0.1588	4.12425	high		0.6622	0.3912	0.4249	0.5296	0.4751	4.86007	high		0.2409	0.3368	0.9599	0.8728	0.8557	1	3.4	high		0.6029	0.2576	0.2029	0.3726	0.7199	1.96821	high		0.6608	0.8088	0.1852	0.7359	0.1672	0.1376	2.76864	high		0.0512	0.2693	0.4524	0.1588
	TCGA-CJ-4902	4.16438	0	0.5961	0.7058	0.387	0.8722	0.6273	1.02399	high		0.4234	0.4817	0.3017	0.6833	0.3187	2.25129	high		0.1585	0.3598	0.8695	0.7706	0.9384	0.7477	1.81493	high		0.7058	0.2471	0.0528	0.4411	0.522	1.39689	high		0.5961	0.9131	0.1402	0.387	0.2493	0.1935	1.34359	high		0.0759	0.2677	0.2174	0.6273
	TCGA-CJ-4903	4.27397	0	0.7591	0.7247	0.2445	0.9684	0.8283	0.413098	low		0.3519	0.5735	0.1462	0.4554	0.2987	0.854957	low		0.1028	0.2478	0.9092	0.2497	0.9246	0.8029	0.94243	high		0.7247	0.5961	0.0392	0.8039	0.9529	0.366186	low		0.7591	0.8915	0.119	0.2445	0.2945	0.2088	0.812547	low		0.0709	0.1361	0.128	0.8283
	TCGA-CJ-4904	9.04658	0	0.8716	0.6913	0.2158	0.97	0.8323	0.359744	low		0.1786	0.5341	0.1221	0.2844	0.072	0.370304	low		0.0711	0.1373	0.9427	0.1753	0.9729	0.798	0.502152	low		0.6913	0.6252	0.041	0.8436	0.8525	0.409841	low		0.8716	0.9041	0.0465	0.2158	0.3046	0.1276	0.397462	low		0.0498	0.1969	0.108	0.8323
	TCGA-CJ-4905	4.09863	0	0.8463	0.5066	0.2888	0.9921	0.634	0.75332	low		0.17	0.4886	0.1303	0.3997	0.076	0.48028	low		0.0738	0.2071	0.9298	0.0784	0.9491	0.6477	0.502743	low		0.5066	0.3349	0.0224	0.8811	0.96	0.712537	low		0.8463	0.8663	0.06	0.2888	0.3277	0.1278	0.468844	low		0.061	0.0584	0.0428	0.634
	TCGA-CJ-4907	4.10685	0	0.813	0.6082	0.2541	0.9496	0.7387	0.567613	low		0.3388	0.4209	0.1464	0.3867	0.184	0.793488	low		0.0988	0.2262	0.9772	0.1921	0.9612	0.578	0.441404	low		0.6082	0.4736	0.0504	0.7952	0.876	0.61238	low		0.813	0.911	0.0676	0.2541	0.2978	0.1772	0.571233	low		0.0837	0.2325	0.1233	0.7387
	TCGA-CJ-4908	4.19452	0	0.7108	0.578	0.265	0.8984	0.5738	0.966665	high		0.2643	0.3928	0.254	0.4566	0.258	1.30154	high		0.1015	0.2885	0.8888	0.6848	0.9207	0.7956	1.50585	high		0.578	0.3757	0.0605	0.7048	0.8181	0.87611	high		0.7108	0.9066	0.0896	0.265	0.2487	0.2266	1.00194	high		0.1042	0.3672	0.1523	0.5738
	TCGA-CJ-4912	4.53973	0	0.6588	0.4135	0.4236	0.9054	0.5919	1.69257	high		0.5514	0.3631	0.2028	0.7128	0.2739	2.30141	high		0.2533	0.5436	0.7746	0.644	0.9484	0.7547	3.33494	high		0.4135	0.196	0.0573	0.3781	0.8107	2.13176	high		0.6588	0.9037	0.1339	0.4236	0.2144	0.3032	2.13091	high		0.2223	0.4568	0.0787	0.5919
	TCGA-CJ-4916	3.76164	0	0.6732	0.6678	0.3819	0.8188	0.8328	0.783615	low		0.5106	0.4836	0.193	0.378	0.2615	1.07568	high		0.1284	0.266	0.8735	0.559	0.9481	0.7142	1.13209	high		0.6678	0.5102	0.0777	0.527	0.7449	0.820717	low		0.6732	0.9133	0.0652	0.3819	0.1714	0.199	1.32439	high		0.0724	0.3635	0.3651	0.8328
	TCGA-CJ-4918	0.254795	1	0.7261	0.6196	0.2676	0.9571	0.4477	0.974223	high		0.253	0.3518	0.1501	0.3375	0.2485	0.885019	high		0.1054	0.211	0.9833	0.6331	0.9469	0.8015	0.860112	low		0.6196	0.2225	0.0134	0.6642	0.9235	0.816413	low		0.7261	0.9083	0.062	0.2676	0.2258	0.1377	0.722885	low		0.0714	0.2685	0.0665	0.4477
	TCGA-CJ-4920	0.380822	1	0.7578	0.5277	0.3302	0.8804	0.6542	0.997047	high		0.2261	0.438	0.2502	0.3335	0.3229	1.10379	high		0.1665	0.251	0.855	0.4239	0.9274	0.6186	1.08325	high		0.5277	0.4997	0.036	0.7007	0.8459	0.774607	low		0.7578	0.8786	0.1202	0.3302	0.219	0.1963	1.1395	high		0.1341	0.1634	0.2933	0.6542
	TCGA-CJ-4923	1.56712	1	0.6282	0.5592	0.5323	0.6568	0.4197	3.01239	high		0.4508	0.1711	0.2595	0.5174	0.3025	2.70534	high		0.1429	0.29	0.8366	0.7423	0.9275	0.8403	2.01573	high		0.5592	0.2559	0.1325	0.6737	0.4532	1.89667	high		0.6282	0.9017	0.0797	0.5323	0.1587	0.2205	2.01746	high		0.153	0.5615	0.5784	0.4197
	TCGA-CJ-5671	10.9233	0	0.7241	0.4568	0.3367	0.9461	0.5428	1.27906	high		0.3201	0.2263	0.3853	0.4974	0.0973	1.94299	high		0.0669	0.2096	0.8637	0.2539	0.9499	0.6413	0.684893	low		0.4568	0.3266	0.1371	0.853	0.8999	1.10265	high		0.7241	0.8962	0.163	0.3367	0.2085	0.1358	1.06557	high		0.0818	0.2248	0.0844	0.5428
	TCGA-CJ-5672	5.40274	1	0.8708	0.7045	0.4823	0.5662	0.7836	1.03867	high		0.4859	0.5531	0.3236	0.2729	0.0911	0.79754	low		0.0885	0.1938	0.9319	0.3884	0.8638	0.7636	1.105	high		0.7045	0.4613	0.142	0.7919	0.5209	0.911357	high		0.8708	0.8709	0.052	0.4823	0.2652	0.1275	0.676023	low		0.0275	0.1308	0.4657	0.7836
	TCGA-CJ-5675	10.7836	0	0.8517	0.8	0.3695	0.9449	0.6731	0.501331	low		0.4245	0.5054	0.1096	0.0604	0.0059	0.300801	low		0.0812	0.1315	0.9744	0.0959	0.9056	0.6652	0.499127	low		0.8	0.7062	0.0764	0.9276	0.8808	0.282215	low		0.8517	0.9302	0.0466	0.3695	0.2241	0.1137	0.572735	low		0	0.3206	0.1949	0.6731
	TCGA-CJ-5676	11.1425	0	0.8113	0.7448	0.5191	0.9461	0.6094	0.798698	low		0.4639	0.2666	0.083	0.5775	0.0518	0.990873	high		0.1	0.1749	0.8892	0.3163	0.8996	0.4951	0.690731	low		0.7448	0.4449	0.0808	0.845	0.9204	0.457803	low		0.8113	0.9161	0.1549	0.5191	0.2424	0.1458	1.00747	high		0.1061	0.445	0.0619	0.6094
	TCGA-CJ-5677	2.14247	1	0.5405	0.4351	0.5227	0.7362	0.5916	2.85324	high		0.4249	0.3098	0.3549	0.4237	0.2028	1.90615	high		0.1854	0.1935	0.8815	0.3386	0.7716	0.841	2.45789	high		0.4351	0.1896	0.1173	0.7226	0.677987	1.91876	high		0.5405	0.8887	0.0871	0.5227	0.2575	0.2022	1.61388	high		0.0407	0.1545	0.492	0.5916
	TCGA-CJ-5678	1.5726	1	0.8721	0.5283	0.5344	0.9623	0.9406	0.661113	low		0.7648	0.4099	0.0672	0.3915	0.15916	0.930056	high		0.0434	0.1829	1	0.2889	0.91	0.6338	0.518968	low		0.5283	0.4108	0.1416	0.7257	0.5639	1.4273	high		0.8721	0.9398	0.0683	0.5344	0.2881	0.0951	0.525094	low		0.05525	0.2257	0.1949	0.9406
	TCGA-CJ-5679	1.86027	1	0.401	0.5865	0.2194	0.7052	0.7447	1.39475	high		0.4541	0.2571	0.3301	0.6389	0.1483	2.44238	high		0.0903	0.23	0.9682	0.507	0.8735	0.7703	1.11846	high		0.5865	0.3448	0.0088	0.644	0.2998	1.53889	high		0.401	0.9483	0.0378	0.2194	0.1463	0.2896	2.13946	high		0.1143	0.3179	0.27644	0.7447
	TCGA-CJ-5680	2.10411	1	0.7946	0.7112	0.3414	0.9273	0.703	0.598569	low		0.3963	0.6839	0.2407	0.1643	0.129	0.443243	low		0.0795	0.2742	0.9761	0.2299	0.958	0.8253	0.677118	low		0.7112	0.6143	0.1195	0.7958	0.878	0.473411	low		0.7946	0.9234	0.0824	0.3414	0.2038	0.1424	0.786316	low		0.1182	0.1083	0.1771	0.703
	TCGA-CJ-5681	1.51233	1	0.805	0.3493	0.4381	0.3333	0.7876	2.87458	high		0.1787	0.4431	0.3222	0.0604	0.0618	0.510352	low		0.1196	0.1062	0.9593	0.1326	0.9447	0.8862	0.608076	low		0.3493	0.7874	0	0.9668	0.0803	1.34867	high		0.805	0.973	0.0787	0.4381	0.2	0.2709	1.22733	high		0.0765	0.0446	0.27847	0.7876
	TCGA-CJ-5682	10.2356	0	0.8656	0.8502	0.4453	1	0.7703	0.398449	low		0.3792	0.4604	0.1633	0.4502	0.2245	0.950229	high		0.1803	0.243	1	0.1441	0.9168	0.888	0.866211	low		0.8502	0.4672	0.0441	0.6117	1	0.380758	low		0.8656	0.8733	0.1053	0.4453	0.2621	0.1634	0.839092	high		0.1367	0.2458	0.0809	0.7703
	TCGA-CJ-5683	5.17534	0	0.8445	0.6736	0.3157	0.9396	0.7674	0.51464	low		0.5131	0.5502	0.1721	0.55	0.1179	0.874823	high		0.06	0.2726	0.9559	0.1401	0.9233	0.4601	0.470857	low		0.6736	0.4659	0.0695	0.7858	0.7199	0.673444	low		0.8445	0.8838	0.0569	0.3157	0.2981	0.1152	0.487775	low		0.0842	0.1441	0.113	0.7674
	TCGA-CJ-5684	6.11233	0	0.8721	0.7537	0.3949	0.9863	0.9006	0.366947	low		0.2091	0.5275	0.0523	0.3915	0.0394	0.352156	low		0.0537	0.1615	0.9428	0.1929	0.9709	0.3658	0.293585	low		0.7537	0.5206	0.0062	0.787	0.9658	0.355048	low		0.8721	0.9337	0.0499	0.3949	0.267	0.1011	0.475035	low		0.0825	0.1444	0.1268	0.9006
	TCGA-CJ-5686	5.58356	0	0.7965	0.6942	0.2505	0.1731	0.7435	1.61782	high		0.399	0.4429	0.1811	0.0985	0.0977	0.494805	low		0.089	0.2403	0.973	0.2718	0.9374	0.7806	0.701681	low		0.6942	0.5982	0.0747	0.5798	0.0724	1.40572	high		0.7965	0.9086	0.0545	0.2505	0.2148	0.1758	0.743962	low		0.1393	0.1911	0.2023	0.7435
	TCGA-CJ-5689	0.00273973	1	0.7794	0.4348	0.3675	0.8383	0.5696	1.46724	high		0.445	0.3173	0.2368	0.5682	0.0847	1.38256	high		0.0873	0.1369	0.9827	0.4629	0.9521	0.5648	0.461442	low		0.4348	0.3217	0.0272	0.5994	0.4559	1.97865	high		0.7794	0.8902	0.1232	0.3675	0.2335	0.108	0.787084	low		0.0311	0.1772	0.0844	0.5696
	TCGA-CJ-6027	9.90411	1	0.3949	0.4236	0.4781	0.9146	0.7651	1.93643	high		0.5537	0.5543	0.1558	0.4986	0.0681	0.729101	low		0.1381	0.2035	0.9268	0.8488	0.8227	0.6838	1.91313	high		0.4236	0.5167	0.0319	0.5918	0.5241	1.49859	high		0.3949	0.9227	0.0862	0.4781	0.1639	0.1916	2.30221	high		0	0.2522	0.1537	0.7651
	TCGA-CJ-6028	4.45205	1	0.7035	0.7414	0.1947	0.896	0.4685	0.770472	low		0.2925	0.3176	0.1124	0.2434	0.1074	0.586103	low		0.3402	0.3349	0.9438	0.7101	0.8981	0.6862	1.97767	high		0.7414	0.4735	0.028	0.7823	0.6727	0.564061	low		0.7035	0.9235	0.0569	0.1947	0.2184	0.2086	0.864112	high		0.0453	0.2987	0.2251	0.4685
	TCGA-CJ-6030	6.29863	1	0.832	0.5783	0.2412	0.8437	0.5672	0.873663	high		0.4744	0.2854	0.249	0.2633	0.1875	1.23487	high		0.1667	0.2863	0.96	0.373	0.8489	0.8263	1.55378	high		0.5783	0.6903	0.1509	0.7939	0.6514	0.784979	low		0.832	0.9149	0.0877	0.2412	0.2073	0.1778	0.764821	low		0.0653	0.2481	0.1552	0.5672
	TCGA-CJ-6031	5.22192	0	0.8427	0.5222	0.2677	0.5901	0.6867	1.22287	high		0.439	0.3453	0.2143	0.6542	0.1476	1.58384	high		0.0979	0.2143	0.9785	0.2876	0.9237	0.8015	0.743283	low		0.5222	0.3035	0.0526	0.6825	0.2704	2.01287	high		0.8427	0.9189	0.052	0.2677	0.2481	0.0792	0.43748	low		0.015	0.2178	0.139	0.6867
	TCGA-CJ-6032	9.96986	0	0.9246	0.7037	0.2203	0.963	0.8872	0.307259	low		0.1703	0.5378	0.2392	0.2489	0.0585	0.453347	low		0.0505	0.1157	0.9757	0.1977	0.9173	0.7503	0.528064	low		0.7037	0.6905	0.022	0.9159	0.9391	0.29979	low		0.9246	0.8811	0.0548	0.2203	0.2516	0.1287	0.473592	low		0.0648	0.1139	0.1552	0.8872
	TCGA-CJ-6033	0.613699	1	0.8004	0.4326	0.3709	0.8977	0.459	1.55236	high		0.652	0.3284	0.1497	0.5096	0.281	1.78399	high		0.0988	0.1853	0.9166	0.6173	0.9265	0.8366	1.12919	high		0.4326	0.1255	0.0186	0.7763	0.7499	1.50367	high		0.8004	0.8722	0.1083	0.3709	0.1262	0.1498	1.27379	high		0.0172	0.1816	0.0747	0.459
	TCGA-CW-5580	5.38082	1	0.8218	0.7246	0.3281	0.9602	0.5304	0.68142	low		0.2773	0.4923	0.2089	0.3375	0.1705	0.706416	low		0.0773	0.2436	0.9327	0.3211	0.9298	0.7291	0.783934	low		0.7246	0.5311	0.0828	0.8421	0.9168	0.434083	low		0.8218	0.8807	0.0925	0.3281	0.2303	0.2501	1.12717	high		0.0691	0.3927	0.022	0.5304
	TCGA-CW-5581	7.66849	0	0.8844	0.6429	0.2634	0.9686	0.8299	0.416315	low		0.1443	0.53	0.1729	0.1962	0.0836	0.371246	low		0.1047	0.191	0.9887	0.1247	0.962	0.5433	0.366352	low		0.6429	0.7107	0.0186	0.9526	0.9491	0.314921	low		0.8844	0.9178	0.0501	0.2634	0.2978	0.141	0.431991	low		0.0549	0.1631	0.1552	0.8299
	TCGA-CW-5583	6.81918	0	0.854	0.773	0.3044	0.9848	0.8586	0.33953	low		0.1969	0.6418	0.0987	0.1997	0.0964	0.275367	low		0.0486	0.1347	0.9343	0.0849	0.94349	0.5157	0.364729	low		0.773	0.5763	0.0068	0.8806	0.9643	0.291296	low		0.854	0.9295	0.063	0.3044	0.2681	0.165	0.570718	low		0.0675	0.1242	0.0971	0.8586
	TCGA-CW-5584	0.449315	1	0.9135	0.5002	0.4542	0.9895	0.7502	0.748393	low		0.144	0.4182	0.2006	0.316	0.103	0.591636	low		0.0637	0.1734	0.9611	0.1112	0.9405	0.547	0.397993	low		0.5002	0.5745	0.0616	0.9463	0.9809	0.531752	low		0.9135	0.8937	0.0579	0.4542	0.2125	0.1384	0.729363	low		0	0.2243	0.0262	0.7502
	TCGA-CW-5585	7.14795	0	0.8702	0.5265	0.3395	0.9337	0.9621	0.506147	low		0.3255	0.6557	0.0804	0.2764	0.082	0.311872	low		0.0517	0.1621	0.975	0.0868	0.9612	0.5168	0.314469	low		0.5265	0.641	0.0192	0.8808	0.7825	0.568523	low		0.8702	0.944	0.0466	0.3395	0.3082	0.0936	0.368085	low		0.0577	0.0622	0.1233	0.9621
	TCGA-CW-5587	6.09863	0	0.8867	0.8414	0.176	0.8886	0.8062	0.298825	low		0.2347	0.4999	0.1143	0.124	0.1141	0.351292	low		0.1587	0.115	0.956	0.155	0.934662	0.6109	0.490459	low		0.8414	0.5236	0.0206	0.8388	0.7573	0.364081	low		0.8867	0.9277	0.0279	0.176	0.2453	0.128	0.410035	low		0.0608	0.2438	0.0334	0.8062
	TCGA-CW-5588	5.52603	0	0.9259	0.6463	0.1529	0.9217	0.533	0.560179	low		0.2021	0.3941	0.1383	0.3358	0.0862	0.552632	low		0.0308	0.1473	0.9822	0.0915	0.8264	0.754	0.755342	low		0.6463	0.5836	0.1891	0.8451	0.8977	0.602739	low		0.9259	0.8977	0.0841	0.1529	0.3546	0.1304	0.322069	low		0	0.2869	0.1268	0.533
	TCGA-CW-5589	6.51507	0	0.8978	0.7709	0.266	0.9387	0.8895	0.311655	low		0.2565	0.4995	0.0694	0.363	0.0412	0.387784	low		0.0683	0.2006	0.9347	0.1062	0.8874	0.5444	0.579175	low		0.7709	0.5976	0.0145	0.8057	0.8571	0.351356	low		0.8978	0.9263	0.0561	0.266	0.2605	0.1283	0.456093	low		0.0125	0.0693	0.0693	0.8895
	TCGA-CW-5590	2.94521	1	0.7475	0.671	0.2681	0.9322	0.6768	0.635517	low		0.2404	0.4687	0.1664	0.4862	0.1582	0.769335	low		0.0643	0.1945	0.9691	0.5172	0.9019	0.8052	0.930038	high		0.671	0.5393	0.06	0.9226	0.8068	0.481437	low		0.7475	0.8961	0.0667	0.2681	0.268	0.1455	0.651627	low		0.108	0.3123	0.2149	0.6768
	TCGA-CW-5591	6.22192	0	0.9324	0.7839	0.1736	0.5939	0.7288	0.549973	low		0.1502	0.5599	0.2949	0.2507	0.0399	0.476225	low		0.1047	0.1562	0.9783	0.1223	0.9296	0.7518	0.545845	low		0.7839	0.6041	0.0201	0.8692	0.386	0.548863	low		0.9324	0.9211	0.0425	0.1736	0.205	0.1438	0.483671	low		0.0246	0.062	0.1569	0.7288
	TCGA-CW-6087	0.112329	1	0.8945	0.4604	0.2703	0.6422	0.1431	2.68253	high		0.3437	0.1474	0.3023	0.495	0.2563	2.51935	high		0.2093	0.2481	0.9727	0.3406	0.8019	0.7782	1.71236	high		0.4604	0.371	0.1019	0.6705	0.3551	2.13709	high		0.8945	0.8935	0.1781	0.2703	0.1674	0.2012	1.14827	high		0.1407	0.3214	0.3675	0.1431
	TCGA-CW-6088	8.8274	0	0.8664	0.8811	0.2109	0.7554	0.879	0.330589	low		0.1942	0.5055	0.1601	0.2614	0.0801	0.426555	low		0.0794	0.1781	0.9778	0.132	0.9483	0.578	0.399501	low		0.8811	0.4808	0.0325	0.7828	0.5171	0.500805	low		0.8664	0.9212	0.0361	0.2109	0.3588	0.19	0.390932	low		0.0837	0.1074	0.139	0.879
	TCGA-CW-6090	6.99178	0	0.762	0.7249	0.2853	0.9738	0.2301	1.06548	high		0.5833	0.427	0.0882	0.584	0.167	1.07713	high		0.2189	0.1146	1	0.1161	0.9496	0.7191	0.494229	low		0.7249	0.3192	0.0851	0.7485	0.9498	0.597721	low		0.762	0.939	0.0624	0.2853	0.2612	0.1376	0.580703	low		0.0381	0.4551	0.139	0.2301
	TCGA-CW-6093	8.61918	0	0.8253	0.9136	0.145	0.9681	0.8571	0.222728	low		0.184	0.5971	0.1273	0.3915	0.1132	0.426915	low		0.0985	0.1854	0.9647	0.1797	0.9333	0.6224	0.511492	low		0.9136	0.5086	0.0382	0.8148	0.9161	0.282189	low		0.8253	0.8966	0.0546	0.145	0.2769	0.1581	0.49575	low		0.0996	0.0807	0.0925	0.8571
	TCGA-CW-6097	1.56438	1	0.7652	0.5689	0.1481	0.8736	0.2353	1.33354	high		0.3411	0.3137	0.2799	0.2147	0.1768	1.03202	high		0.1074	0.2578	0.9418	0.3217	0.8697	0.8034	1.20261	high		0.5689	0.2699	0.2377	0.7047	0.6314	1.78289	high		0.7652	0.9126	0.1022	0.1481	0.2356	0.1958	0.764494	low		0.0319	0.3252	0.0294	0.2353
	TCGA-CZ-4853	2.12055	0	0.8239	0.4342	0.4771	0.874	0.8977	0.938917	high		0.3179	0.7704	0.1254	0.1338	0.1545	0.26942	low		0.064	0.1848	0.9737	0.1956	0.9208	0.6578	0.530668	low		0.4342	0.6783	0.0313	0.8806	0.8344	0.636938	low		0.8239	0.9405	0.113	0.4771	0.2463	0.1351	0.770072	low		0.0894	0.148	0.1557	0.8977
	TCGA-CZ-4854	3.84658	1	0.5954	0.3866	0.2825	0.787	0.664	1.69251	high		0.39	0.5316	0.2235	0.407	0.4372	1.41671	high		0.1738	0.4475	0.9877	0.4299	0.8912	0.7758	1.52848	high		0.3866	0.4484	0.0766	0.6675	0.815	1.28721	high		0.5954	0.9252	0.1311	0.2825	0.2897	0.2968	1.43386	high		0.0803	0.3089	0.4626	0.664
	TCGA-CZ-4856	0.0493151	0	0.8998	0.6539	0.1787	0.9609	0.7065	0.430587	low		0.1446	0.3994	0.1186	0.2568	0.0446	0.408244	low		0.0958	0.1587	0.9919	0.0789	0.93684	0.5328	0.363121	low		0.6539	0.6803	0.0313	0.8577	0.8875	0.385275	low		0.8998	0.9135	0.0413	0.1787	0.2918	0.0789	0.309543	low		0.0576	0.1948	0.0844	0.7065
	TCGA-CZ-4857	3.92329	1	0.2315	0.2449	0.368	0.9509	0.6952	2.97108	high		0.2633	0.2837	0.2065	0.3726	0.2739	1.27586	high		0.1573	0.314	0.8245	0.7758	0.8833	0.587	2.01076	high		0.2449	0.2821	0.139	0.8924	0.9353	1.68911	high		0.2315	0.8576	0.1941	0.368	0.3211	0.2108	2.44031	high		0.0619	0.326	0.3262	0.6952
	TCGA-CZ-4858	5.76712	1	0.3524	0.1423	0.4171	0.8886	0.570767	4.34951	high		0.6525	0.06	0.2945	0.2785	0.3981	3.69298	high		0.2813	0.3083	0.974	0.7819	0.6658	0.9062	6.68692	high		0.1423	0.1883	0.14956	0.5863	0.8525	3.55775	high		0.3524	0.942	0.3284	0.4171	0.0927	0.2725	6.33189	high		0.0603	0.3092	0.26608	0.570767
	TCGA-CZ-4859	4.89589	0	0.9165	0.6664	0.3046	0.9634	0.9696	0.331743	low		0.2039	0.8029	0.1571	0.3172	0.0208	0.247328	low		0.0493	0.0781	0.9851	0.0481	0.962	0.872	0.40797	low		0.6664	0.7296	0.0158	0.9432	0.8941	0.312709	low		0.9165	0.913	0.0759	0.3046	0.3338	0.0858	0.337987	low		0	0.1021	0.0747	0.9696
	TCGA-CZ-4860	0.564384	1	0.2301	0.1061	0.7408	0.7002	0.088	24.1878	high		0.5222	0.09	0.046	0.6881	0.3804	2.87929	high		0.2495	0.403	0.7408	0.446	0.6745	0.8694	10.5015	high		0.1061	0.145	0.3076	0.8195	0.1674	9.55709	high		0.2301	0.2324	0.4903	0.7408	0.2245	0.1539	34.5547	high		0.0974	0.472	0.20627	0.088
	TCGA-CZ-4861	1.22192	1	0.7735	0.3043	0.3774	0.9403	0.4188	2.03853	high		0.3834	0.267	0.1068	0.2245	0.1997	0.798913	low		0.0569	0.2302	0.885	0.6946	0.935067	0.7744	1.17575	high		0.3043	0.4511	0.1444	0.8414	0.8623	1.39525	high		0.7735	0.7438	0.0942	0.3774	0.2743	0.1757	1.17154	high		0.0275	0.1696	0.3262	0.4188
	TCGA-CZ-4862	8.96164	0	0.8187	0.5971	0.2685	0.9011	0.8261	0.554499	low		0.3242	0.4367	0.2832	0.1726	0.0953	0.666637	low		0.0916	0.2923	0.9376	0.4639	0.9799	0.5748	0.616123	low		0.5971	0.5098	0.118	0.6296	0.8371	0.841137	high		0.8187	0.8706	0.0664	0.2685	0.2812	0.1985	0.717879	low		0.0724	0.2229	0.4587	0.8261
	TCGA-CZ-4863	5.28219	0	0.8552	0.6511	0.3224	0.9461	0.799	0.503879	low		0.3165	0.54	0.2222	0.2739	0.2554	0.754512	low		0.1424	0.243	0.9281	0.3631	0.9453	0.5942	0.705083	low		0.6511	0.4335	0.0583	0.7592	0.8477	0.638599	low		0.8552	0.8727	0.0224	0.3224	0.2387	0.2264	0.829068	low		0.0523	0.1348	0.257	0.799
	TCGA-CZ-4864	3.60274	1	0.8418	0.5534	0.2961	0.9511	0.8302	0.5578	low		0.2725	0.5642	0.1844	0.3752	0.2334	0.698965	low		0.1209	0.2543	0.9072	0.3902	0.9638	0.6426	0.737286	low		0.5534	0.624	0.0655	0.8435	0.9204	0.533407	low		0.8418	0.9266	0.0525	0.2961	0.3357	0.1997	0.512827	low		0.1139	0.2123	0.3131	0.8302
	TCGA-CZ-4865	0.454795	1	0.886	0.7176	0.1878	0.894	0.859	0.348814	low		0.4625	0.4971	0.3953	0.2868	0.3898	1.89394	high		0.1226	0.1487	0.9889	0.4608	0.9546	0.7118	0.586038	low		0.7176	0.4951	0.0671	0.6679	0.7869	0.612904	low		0.886	0.8805	0.0288	0.1878	0.3147	0.0965	0.330771	low		0.1402	0.1899	0.204	0.859
	TCGA-CZ-4866	8.95068	0	0.7882	0.6938	0.2102	0.7887	0.719	0.621438	low		0.2963	0.7922	0.2784	0.1076	0.2608	0.44404	low		0.0668	0.2296	0.9429	0.6777	0.9598	0.7235	0.826172	low		0.6938	0.5549	0.0485	0.7147	0.6463	0.646088	low		0.7882	0.9293	0.1148	0.2102	0.2786	0.3076	1.01626	high		0.0271	0.1477	0.5137	0.719
	TCGA-CZ-5451	5.28493	0	0.8267	0.6098	0.2802	0.9558	0.8891	0.456067	low		0.2812	0.5639	0.0988	0.0569	0.0187	0.237986	low		0.0728	0.1369	0.9774	0.15	0.94436	0.5353	0.359914	low		0.6098	0.674	0.0192	0.942	0.9415	0.360502	low		0.8267	0.9382	0.0525	0.2802	0.3293	0.1257	0.393548	low		0.0231	0.1511	0.1058	0.8891
	TCGA-CZ-5452	4.90137	0	0.8362	0.3862	0.3716	0.8383	0.555	1.52876	high		0.5364	0.4616	0.1816	0.3149	0.1376	0.79539	low		0.0586	0.2787	0.9723	0.4907	0.8951	0.807	1.07071	high		0.3862	0.5047	0.2315	0.8262	0.6665	1.65239	high		0.8362	0.937	0.1265	0.3716	0.1309	0.207	1.30926	high		0.0393	0.4628	0.3102	0.555
	TCGA-CZ-5453	6.6274	1	0.8406	0.5039	0.2263	0.9394	0.8813	0.52033	low		0.3702	0.6668	0.1816	0.2263	0.1283	0.419004	low		0.0521	0.153	0.968	0.1824	0.975	0.6039	0.357725	low		0.5039	0.6157	0.0218	0.6882	0.9138	0.643234	low		0.8406	0.8836	0.0321	0.2263	0.3192	0.0862	0.351909	low		0.0275	0.0473	0.1537	0.8813
	TCGA-CZ-5454	1.97808	1	0.8968	0.6455	0.1671	0.977	0.7262	0.408703	low		0.411	0.5348	0.0748	0.3915	0.1282	0.525336	low		0.1153	0.2154	0.9057	0.3343	0.9452	0.6899	0.764895	low		0.6455	0.4786	0.0719	0.9347	0.9759	0.457646	low		0.8968	0.8331	0.1014	0.1671	0.2294	0.1112	0.580916	low		0.0365	0.1634	0.1268	0.7262
	TCGA-CZ-5455	1.53699	1	0.9359	0.8078	0.2618	0.8938	0.786	0.344973	low		0.1345	0.4871	0.118	0.229	0.1549	0.416262	low		0.0812	0.2005	0.954	0.2656	0.8927	0.6881	0.744206	low		0.8078	0.5435	0.0391	0.8926	0.728	0.387858	low		0.9359	0.92	0.0353	0.2618	0.2906	0.1713	0.438201	low		0.0266	0.1954	0.1771	0.786
	TCGA-CZ-5456	6.63562	0	0.8349	0.3217	0.3884	0.7882	0.8939	1.14393	high		0.3729	0.4615	0.1589	0.5335	0.1396	0.886157	high		0.0702	0.2351	0.9506	0.3639	0.7493	0.7241	1.74614	high		0.3217	0.5263	0.13	0.9046	0.3414	2.01788	high		0.8349	0.8754	0.2209	0.3884	0.2346	0.1743	1.20554	high		0.0288	0.2311	0.108	0.8939
	TCGA-CZ-5457	7.54521	0	0.8534	0.8316	0.2843	0.7704	0.7845	0.461293	low		0.2841	0.532	0.0679	0.2481	0.2014	0.437939	low		0.0753	0.1355	0.9251	0.1039	0.95	0.4347	0.345673	low		0.8316	0.6119	0.0417	0.8643	0.8027	0.321912	low		0.8534	0.8945	0.027	0.2843	0.2443	0.111	0.497682	low		0.0943	0.0754	0.094	0.7845
	TCGA-CZ-5458	7.6411	0	0.8628	0.5794	0.2263	0.9068	0.7653	0.551756	low		0.3568	0.5214	0.1127	0.2186	0.1957	0.504889	low		0.0563	0.2076	0.9807	0.247	0.9627	0.609	0.427172	low		0.5794	0.7487	0.0704	0.7905	0.7499	0.558018	low		0.8628	0.9349	0.0825	0.2263	0.3129	0.0846	0.343942	low		0.1372	0.1822	0.212	0.7653
	TCGA-CZ-5459	4.61096	0	0.889	0.6925	0.5216	0.8922	0.7341	0.716262	low		0.3381	0.5097	0.0968	0.1743	0.0852	0.367541	low		0.0691	0.2396	0.9791	0.4789	0.9717	0.7415	0.630987	low		0.6925	0.5922	0.0184	0.6063	0.8059	0.541082	low		0.889	0.8841	0.0939	0.5216	0.2741	0.1287	0.716029	low		0.0322	0.1409	0.1288	0.7341
	TCGA-CZ-5460	7.87123	0	0.8385	0.4887	0.5673	0.9201	0.7314	1.13889	high		0.4783	0.5347	0.2486	0.2161	0.1307	0.676866	low		0.0957	0.2363	0.9599	0.523	0.8624	0.6809	1.10693	high		0.4887	0.7023	0.0456	0.8582	0.7532	0.635274	low		0.8385	0.856	0.1869	0.5673	0.2102	0.1268	1.3111	high		0.1393	0.1463	0.139	0.7314
	TCGA-CZ-5461	0.90411	1	0.8779	0.4544	0.442	0.8977	0.6063	1.19731	high		0.2295	0.3461	0.0908	0.3915	0.0303	0.528328	low		0.1059	0.1752	0.9366	0.1759	0.9522	0.5299	0.44533	low		0.4544	0.6838	0.1199	0.814	0.8893	0.724147	low		0.8779	0.8857	0.0853	0.442	0.285	0.1705	0.725517	low		0.0603	0.3302	0.0422	0.6063
	TCGA-CZ-5462	0.852055	1	0.8719	0.4825	0.1854	0.4977	0.6357	1.39559	high		0.4642	0.3321	0.1966	0.1416	0.1977	0.85282	low		0.0812	0.211	0.9133	0.4381	0.913	0.6694	0.863265	low		0.4825	0.7204	0.0533	0.738	0.2393	1.28416	high		0.8719	0.9289	0.051	0.1854	0.1123	0.2184	0.950083	high		0.118	0.2932	0.244	0.6357
	TCGA-CZ-5463	1.8137	0	0.9122	0.7667	0.343	0.9621	0.8943	0.330198	low		0.2413	0.6461	0.0672	0.1437	0.1116	0.250451	low		0.0403	0.1538	0.949	0.2447	0.939078	0.8117	0.608887	low		0.7667	0.7127	0.0192	0.7691	0.9655	0.284522	low		0.9122	0.9643	0.0243	0.343	0.3418	0.2263	0.452418	low		0.0241	0.1247	0.1537	0.8943
	TCGA-CZ-5464	5.83014	0	0.8715	0.5466	0.3534	0.8816	0.6242	0.895792	high		0.3498	0.4186	0.155	0.5046	0.2235	1.0487	high		0.0732	0.3654	1	0.2571	0.8845	0.7233	0.922849	high		0.5466	0.49	0.0578	0.7555	0.815	0.772026	low		0.8715	0.9078	0.0892	0.3534	0.2813	0.161	0.619568	low		0.0484	0.317	0.1719	0.6242
	TCGA-CZ-5465	7.02466	1	0.8226	0.5939	0.4136	0.8829	0.8907	0.639861	low		0.1605	0.6983	0.1047	0.2513	0.3326	0.421792	low		0.0597	0.1075	0.9804	0.1546	0.9521	0.6892	0.394346	low		0.5939	0.6787	0.0409	0.899	0.794	0.47655	low		0.8226	0.8195	0.0939	0.4136	0.2443	0.2246	1.25299	high		0.0572	0.2181	0.1497	0.8907
	TCGA-CZ-5466	1.87671	0	0.8236	0.4462	0.5089	0.6422	0.7394	1.74495	high		0.4179	0.3326	0.2083	0.4871	0.0943	1.1137	high		0.0825	0.2694	0.885	0.3776	0.9199	0.4578	0.725316	low		0.4462	0.51	0.0674	0.9263	0.454	1.20708	high		0.8236	0.8825	0.0844	0.5089	0.2163	0.1157	0.882383	high		0.0445	0.1851	0.19129	0.7394
	TCGA-CZ-5467	0.2	1	0.8215	0.4766	0.192	1	0.659	0.678919	low		0.4131	0.5432	0.0805	0.3531	0.0968	0.46861	low		0.0772	0.2144	0.9424	0.2094	0.9513	0.8714	0.72597	low		0.4766	0.4971	0.042	0.8887	0.9822	0.624915	low		0.8215	0.8731	0.0897	0.192	0.2551	0.1289	0.58237	low		0.1919	0.183	0.0802	0.659
	TCGA-CZ-5468	0.161644	1	0.3052	0.316	0.6294	0.854	0.6435	4.35449	high		0.5822	0.1943	0.3017	0.651	0.1768	3.05534	high		0.129	0.2954	0.9637	0.4588	0.8175	0.9207	2.06624	high		0.316	0.4279	0.1019	0.7958	0.702	1.61433	high		0.3052	0.8586	0.2218	0.6294	0.2006	0.1852	4.27514	high		0.09	0.259	0.4089	0.6435
	TCGA-CZ-5469	2.59178	1	0.2576	0.2338	0.6182	0.8383	0.0903	12.4714	high		0.8119	0.4505	0.1405	0.7605	0.3321	2.56941	high		0.1047	0.402	0.8128	0.6727	0.9024	0.9541	3.06596	high		0.2338	0.1655	0.1016	0.4767	0.5623	4.24144	high		0.2576	0.7967	0.0975	0.6182	0.2153	0.1793	3.68807	high		0.0665	0.5754	0.5158	0.0903
	TCGA-CZ-5470	1.05753	0	0.8652	0.649	0.5601	0.7452	0.832	0.91518	high		0.3967	0.3916	0.1967	0.185	0.0673	0.595662	low		0.1555	0.2222	0.9339	0.3771	0.9598	0.7857	0.83078	low		0.649	0.4902	0.0328	0.8539	0.4323	0.829106	high		0.8652	0.8965	0.0359	0.5601	0.2657	0.1525	0.741257	low		0.09	0.0973	0.3074	0.832
	TCGA-CZ-5982	6.68219	0	0.8874	0.8498	0.2596	0.9853	0.8347	0.274282	low		0.2103	0.5925	0.2386	0.349	0.105	0.539236	low		0.1131	0.1886	0.946	0.1824	0.9659	0.5486	0.432929	low		0.8498	0.5991	0.0347	0.8423	0.9161	0.279023	low		0.8874	0.8988	0.0761	0.2596	0.3558	0.1673	0.430219	low		0.0403	0.1956	0.1258	0.8347
	TCGA-CZ-5984	5.66301	0	0.845	0.4581	0.2113	0.8989	0.6158	0.872759	high		0.263	0.5871	0.1656	0.4093	0.1651	0.582688	low		0.071	0.2562	0.9768	0.273	0.8192	0.6909	1.07708	high		0.4581	0.6269	0.0608	0.7051	0.8735	0.776707	low		0.845	0.9189	0.0632	0.2113	0.2803	0.1933	0.56481	low		0.0426	0.3849	0.2068	0.6158
	TCGA-CZ-5985	5.47123	0	0.9068	0.6887	0.1941	0.9668	0.7246	0.395054	low		0.2785	0.6519	0.1137	0.0439	0.1857	0.289907	low		0.1352	0.2991	0.9538	0.3375	0.9198	0.7901	1.02165	high		0.6887	0.6697	0.052	0.5808	0.955	0.458704	low		0.9068	0.9365	0.0823	0.1941	0.2529	0.2307	0.632241	low		0.0396	0.3605	0.2251	0.7246
	TCGA-CZ-5986	1.02192	0	0.8616	0.9228	0.2081	0.8769	0.8473	0.267325	low		0.208	0.5986	0.0627	0.3398	0.1435	0.3656	low		0.0387	0.2595	0.962	0.1313	0.9495	0.6051	0.465331	low		0.9228	0.6933	0.0136	0.422	0.8126	0.345985	low		0.8616	0.9289	0.0552	0.2081	0.3051	0.2409	0.575291	low		0.0087	0.1463	0.0511	0.8473
	TCGA-CZ-5987	1.21918	1	0.7952	0.3934	0.3174	0.9644	0.7707	0.876195	high		0.5797	0.5516	0.2667	0.2161	0.2109	0.882974	high		0.0698	0.2248	0.9461	0.427	0.9102	0.8583	1.0183	high		0.3934	0.5633	0.0533	0.6149	0.6817	1.2867	high		0.7952	0.8548	0.1597	0.3174	0.2088	0.2076	1.31827	high		0	0.3179	0.25462	0.7707
	TCGA-CZ-5988	1.89863	0	0.7293	0.8516	0.2214	0.9651	0.7089	0.397088	low		0.2664	0.5075	0.1798	0.4093	0.0274	0.528012	low		0.1416	0.2154	0.9587	0.4175	0.9405	0.7377	0.791923	low		0.8516	0.4444	0	0.411	0.9204	0.476338	low		0.7293	0.9103	0.0701	0.2214	0.3293	0.1702	0.551993	low		0.0167	0.227	0.108	0.7089
	TCGA-CZ-5989	5.21918	0	0.9439	1	0.0228	0.7882	0.5181	0.299298	low		0.3522	0.5865	0.1889	0.4923	0.3022	0.986878	high		0.0823556	0.3794	0.9434	0.5181	0.893914	1	1.90838	high		1	0.432	0.0078	0.6051	0.794	0.343062	low		0.9439	0.9035	0.0161	0.0228	0.2736	0.2348	0.431328	low		0.1821	0.1814	0.273433	0.5181
	TCGA-DV-5565	3.6411	0	0.8709	0.5017	0.3841	1	0.4889	1.03927	high		0.3932	0.3921	0.3404	0.4661	0.2312	1.74364	high		0.1024	0.123	0.9485	0.2545	0.9643	0.4145	0.336371	low		0.5017	0.4012	0.0294	0.9478	0.6782	0.866416	high		0.8709	0.8208	0.055	0.3841	0.258	0.1086	0.651262	low		0.0808	0.1851	0.0826	0.4889
	TCGA-DV-5566	3.83014	0	0.9054	0.7031	0.3739	0.9162	0.8276	0.464043	low		0.2033	0.4746	0.2009	0.5046	0.0362	0.647228	low		0.0459	0.1437	0.9096	0.301	0.9473	0.4586	0.425824	low		0.7031	0.6516	0.0112	0.9026	0.794	0.367997	low		0.9054	0.8865	0.047	0.3739	0.2588	0.1029	0.504696	low		0.0311	0.0821	0.2251	0.8276
	TCGA-DV-5567	5.49041	0	0.8771	0.5046	0.1527	0.9634	0.6587	0.599306	low		0.1382	0.8146	0.139	0.1512	0.0496	0.183287	low		0.0585	0.1756	0.9581	0.0693	0.9619	0.5932	0.372079	low		0.5046	0.5551	0.0042	0.8411	0.9113	0.577639	low		0.8771	0.9085	0.1012	0.1527	0.3095	0.1394	0.420387	low		0.0275	0.2168	0.0952	0.6587
	TCGA-DV-5568	1.0137	0	0.7321	0.6076	0.4228	0.8977	0.686	0.948262	high		0.468	0.4134	0.2655	0.378	0.1954	1.22729	high		0.0819	0.1842	0.9696	0.5927	0.9377	0.5958	0.63524	low		0.6076	0.2904	0.0673	0.5301	0.6163	1.38086	high		0.7321	0.9013	0.0438	0.4228	0.1817	0.0771	0.781247	low		0.0867	0.3082	0.2906	0.686
	TCGA-DV-5569	0.972603	0	0.8439	0.7737	0.3769	0.8777	0.8244	0.474184	low		0.3283	0.5726	0.1006	0.2956	0.1686	0.462065	low		0.1253	0.1518	0.896	0.615	0.9454	0.6642	0.857132	low		0.7737	0.3913	0.071	0.7859	0.8716	0.505383	low		0.8439	0.8769	0.0601	0.3769	0.2682	0.1103	0.581876	low		0.0194	0.102	0.139	0.8244
	TCGA-DV-5573	3.09589	0	0.8429	0.7614	0.4687	0.7722	0.6926	0.796156	low		0.4693	0.5732	0.2175	0.4911	0.195	0.971877	high		0.0865	0.1978	0.9139	0.2949	0.9307	0.7273	0.75632	low		0.7614	0.5341	0.0908	0.7246	0.5024	0.728287	low		0.8429	0.9232	0.047	0.4687	0.2762	0.1651	0.670832	low		0.0393	0.2914	0.492	0.6926
	TCGA-DV-5574	5.52329	0	0.8766	0.663	0.2146	0.8271	0.3728	0.934205	high		0.3325	0.1826	0.1741	0.3721	0.0809	1.01392	high		0.0741	0.1613	0.9253	0.4635	0.9176	0.7463	0.835997	low		0.663	0.3283	0.0307	0.7012	0.5928	0.9481	high		0.8766	0.8724	0.0528	0.2146	0.2026	0.0984	0.541365	low		0.0912	0.1517	0.0986	0.3728
	TCGA-DV-5575	4.73699	0	0.8531	0.7016	0.3137	0.9381	0.6651	0.563834	low		0.2744	0.5721	0.1611	0.2224	0.0833	0.390703	low		0.0698	0.1513	0.9837	0.4117	0.9766	0.5815	0.401871	low		0.7016	0.5339	0.0437	0.7393	0.8852	0.481574	low		0.8531	0.8721	0.0911	0.3137	0.2803	0.1314	0.59831	low		0.0424	0.1841	0.0647	0.6651
	TCGA-DV-5576	1.99178	1	0.8429	0.6872	0.1862	0.9476	0.5493	0.571297	low		0.2733	0.7266	0.3029	0.349	0.1498	0.582425	low		0.0676	0.2146	0.9418	0.0963	0.9423	0.7652	0.595763	low		0.6872	0.509	0.0085	0.7207	0.8222	0.522213	low		0.8429	0.9191	0.0596	0.1862	0.2546	0.1651	0.536896	low		0.1578	0.227	0.204	0.5493
	TCGA-DV-A4VX	4.45479	1	0.775	0.5641	0.6547	0.2339	0.8706	2.85864	high		0.8381	0.658	0.4567	0.49371	0.1044	1.78269	high		0.1825	0.2875	0.9139	0.8166	0.9172	1	2.33755	high		0.5641	0.302	0.1787	0.648	0.1466	2.8163	high		0.775	0.7872	0.2196	0.6547	0.1848	0.1798	2.64088	high		0.3682	0.1725	1	0.8706
	TCGA-DV-A4VZ	1	0	0.7511	0.4472	0.5632	0.9276	0.5085	1.89377	high		0.7508	0.746	0.2661	0.2087	0.2454	0.781433	low		0.1328	0.3765	0.7976	0.599	0.9748	0.849	1.87219	high		0.4472	0.2565	0	0.2898	0.460117	2.6657	high		0.7511	0.8183	0.1138	0.5632	0.196	0.1371	1.4959	high		0.2234	0.4853	0.6755	0.5085
	TCGA-DV-A4W0	6.76712	0	0.7603	0.8743	0.3548	0.6515	0.6885	0.74228	low		0.3401	0.4992	0.2705	0.322	0.1114	0.749668	low		0.1319	0.3636	0.9392	0.5231	0.9621	0.8803	1.26053	high		0.8743	0.3487	0.0133	0.8432	0.4558	0.581931	low		0.7603	0.9153	0.1114	0.3548	0.2782	0.2273	0.968212	high		0.0769	0.3068	0.2844	0.6885
	TCGA-EU-5904	1.50959	0	0.8233	0.668	0.2823	0.9803	0.834	0.432684	low		0.3134	0.5385	0.074	0.2004	0.0628	0.320844	low		0.041	0.2723	0.9638	0.3677	0.957	0.6986	0.62152	low		0.668	0.6716	0.0062	0.8036	0.9002	0.373882	low		0.8233	0.8566	0.0535	0.2823	0.2978	0.1158	0.512983	low		0.0503	0.1333	0.1642	0.834
	TCGA-EU-5905	0.326027	0	0.8765	0.6016	0.4541	0.9796	0.6404	0.783188	low		0.5179	0.6745	0.0345	0.363	0.1946	0.451324	low		0.067	0.2218	0.9083	0.522	0.9134	0.367	0.621709	low		0.6016	0.5648	0.1162	0.934	0.9415	0.512281	low		0.8765	0.9382	0.089	0.4541	0.2131	0.1111	0.675893	low		0.0204	0.2131	0.1591	0.6404
	TCGA-EU-5906	0.564384	0	0.8714	0.7974	0.1881	0.9536	0.8003	0.306853	low		0.1875	0.4341	0.1191	0.2768	0.0637	0.427586	low		0.0892	0.1608	0.9614	0.1491	0.9513	0.4226	0.335793	low		0.7974	0.4728	0.034	0.7793	0.9237	0.383465	low		0.8714	0.9118	0.0417	0.1881	0.3099	0.134	0.376106	low		0.0283	0.1299	0.1826	0.8003
	TCGA-EU-5907	0.347945	0	0.8969	0.5551	0.4271	0.8546	0.6408	0.965739	high		0.2043	0.6868	0.1074	0.31535	0.1192	0.322831	low		0.0898	0.1947	0.9213	0.4189	0.7733	0.4602	1.20055	high		0.5551	0.7915	0.0648	0.9382	0.7746	0.463881	low		0.8969	0.8979	0.044	0.4271	0.3326	0.1809	0.545226	low		0.1876	0.3881	0.3557	0.6408
	TCGA-G6-A8L6	0.857534	1	0.5509	0.5087	0.7062	0.8697	0.5373	2.84535	high		0.8719	0.5395	0.0879	1	0.1627	2.04322	high		0.1395	0.2778	0.9285	0.7455	0.8509	0.7251	1.85239	high		0.5087	0.0683	0.2121	0.3621	0.563	3.72543	high		0.5509	0.8069	0.1306	0.7062	0.21	0.1579	2.61594	high		0.2798	0.2985	0.5867	0.5373
	TCGA-G6-A8L8	2.98904	1	0.6948	0.3568	0.5792	0.7966	0.9056	1.65482	high		0.753	0.6152	0.1405	0.5587	0.2633	1.21038	high		0.1227	0.4048	0.8196	0.6328	0.930883	0.7873	2.11039	high		0.3568	0.2739	0	0.5782	0.617	1.99517	high		0.6948	0.9069	0.0851	0.5792	0.2508	0.1546	1.12822	high		0.2057	0.0773	0.2358	0.9056
	TCGA-GK-A6C7	0.167123	0	0.809	0.7079	0.2295	0.9674	0.652	0.509435	low		0.2645	0.509	0.1263	0.322	0.0589	0.433164	low		0.0823	0.1888	0.9076	0.1648	0.9348	0.3183	0.388888	low		0.7079	0.5451	0.0525	0.8572	0.9601	0.390597	low		0.809	0.9216	0.0657	0.2295	0.34	0.1678	0.456866	low		0.1469	0.2664	0.1571	0.652
	TCGA-MM-A563	1.61918	0	0.7235	0.4771	0.5959	0.662	0.7817	1.94583	high		0.7609	0.4836	0.2683	0.5587	0.111	1.55271	high		0.0937	0.2917	0.8716	0.3976	0.8825	0.7186	1.36656	high		0.4771	0.2523	0.0322	0.456	0.5863	1.97689	high		0.7235	0.8745	0.1371	0.5959	0.2068	0.1546	1.54111	high		0.2256	0.3346	0.3212	0.7817
	TCGA-MM-A564	1.66301	0	0.6672	0.4333	0.4566	0.686	0.2546	3.94527	high		0.8981	0.2954	0.1275	0.7064	0.1679	2.34305	high		0.1637	0.2648	0.9359	0.674	0.9512	0.749	1.12003	high		0.4333	0.1957	0	0.3754	0.659	2.17424	high		0.6672	0.8788	0.1619	0.4566	0.1872	0.1387	1.50215	high		0.1147	0.5187	0.1913	0.2546
	TCGA-MM-A84U	1.91781	0	0.6946	0.3348	0.4658	0.7485	0.4459	3.13997	high		0.7299	0.4306	0.3099	0.4472	0.1272	1.61978	high		0.1181	0.3549	1	0.2668	0.9337	0.9214	1.00976	high		0.3348	0.2928	0.0236	0.6406	0.3005	2.87777	high		0.6946	0.8268	0.1203	0.4658	0.1337	0.25	2.6488	high		0.1817	0.0882	0.6883	0.4459
	TCGA-MW-A4EC	1.36438	0	0.8744	0.6832	0.3213	0.9439	0.8715	0.416335	low		0.4243	0.6235	0.1347	0.3339	0.1032	0.465935	low		0.0882	0.2164	0.8584	0.1645	0.9464	0.4312	0.522818	low		0.6832	0.3746	0.049	0.6552	0.8501	0.695681	low		0.8744	0.8778	0.0387	0.3213	0.3771	0.1035	0.33821	low		0.04	0.165	0.4645	0.8715
	TCGA-T7-A92I	0.975342	0	0.592	0.6022	0.2656	0.708	0.7601	1.09659	high		0.2194	0.3467	0.378	0.0418	0.0713	0.711901	low		0.0679	0.1768	0.9555	0.7867	0.9535	0.754	0.849081	low		0.6022	0.8	0.0127	0.5287	0.5956	0.684619	low		0.592	0.9617	0.0296	0.2656	0.2015	0.1634	0.86068	high		0.13	0.0556	0.4862	0.7601
[truncated: 25 more columns]
